# Supplementary material for: A YAP/TAZ-TEAD signalling module links endothelial nutrient acquisition to angiogenic growth
Source: Nat Metab. 2022 Jun 20;4(6):672–82. doi: 10.1038/s42255-022-00584-y (PMC9236904; doi:10.1038/s42255-022-00584-y)
Supplement: Source Data Extended Data Fig. 1 — Statistical source data. [file 42255_2022_584_MOESM17_ESM.xlsx]

## Sheet: Extended Data Fig.1c
Extended Data Fig.1c
	EC Coverage			EC Number/Field			EC Proliferation (%)
	Ctrl	YAP/TAZ iECKO		Ctrl	YAP/TAZ iECKO		Ctrl	YAP/TAZ iECKO
	53.07	31.2		68	52.43		41.78	25.56
	47.82	33.69		70.13	51.63		37.76	33.74
	49.91	27.45		67.29	39.25		39.81	23.78
	42.62	29.69		71.57	50.375		36.02	12.76
	44.84	26.24		67.625	54.33		38.59
	48.99	27.43		72.38	46.86		38.83
	43.74			61			36.05
	47.11			60.5
	40.47			73
	43.95
	46.98
	46.62
	Table Analyzed	EC coverage		Table Analyzed	EC number per field		Table Analyzed	EC proliferation (%)
	Column B	YAP/TAZ iECKO		Column B	YAP/TAZ iECKO		Column B	YAP/TAZ iECKO
	vs.	vs,		vs.	vs,		vs.	vs,
	Column A	Ctrl		Column A	Ctrl		Column A	Ctrl
	Unpaired t test			Unpaired t test			Unpaired t test
	P value	<0,0001		P value	<0,0001		P value	0.0018
	P value summary	****		P value summary	****		P value summary	**
	Significantly different (P < 0.05)?	Yes		Significantly different (P < 0.05)?	Yes		Significantly different (P < 0.05)?	Yes
	One- or two-tailed P value?	Two-tailed		One- or two-tailed P value?	Two-tailed		One- or two-tailed P value?	Two-tailed
	t, df	t=10,45, df=16		t, df	t=7,236, df=13		t, df	t=4,382, df=9
	How big is the difference?			How big is the difference?			How big is the difference?
	Mean of column A	46.34		Mean of column A	67.94		Mean of column A	38.41
	Mean of column B	29.28		Mean of column B	49.15		Mean of column B	23.96
	Difference between means (B - A) ± SEM	-17,06 ± 1,633		Difference between means (B - A) ± SEM	-18,80 ± 2,598		Difference between means (B - A) ± SEM	-14,45 ± 3,296
	95% confidence interval	-20,52 to -13,60		95% confidence interval	-24,41 to -13,19		95% confidence interval	-21,90 to -6,989
	R squared (eta squared)	0.8721		R squared (eta squared)	0.8011		R squared (eta squared)	0.6809
	F test to compare variances			F test to compare variances			F test to compare variances
	F, DFn, Dfd	1,519, 11, 5		F, DFn, Dfd	1,420, 5, 8		F, DFn, Dfd	17,73, 3, 6
	P value	0.6758		P value	0.627		P value	0.0044
	P value summary	ns		P value summary	ns		P value summary	**
	Significantly different (P < 0.05)?	No		Significantly different (P < 0.05)?	No		Significantly different (P < 0.05)?	Yes
	Data analyzed			Data analyzed			Data analyzed
	Sample size, column A	12		Sample size, column A	9		Sample size, column A	7
	Sample size, column B	6		Sample size, column B	6		Sample size, column B	4

## Sheet: Extended Data Fig.1f
Extended Data Fig.1f
	EC Coverage (%)			EC Number/Field
	Ctrl	Yap iEC-KO		Ctrl	Yap iEC-KO
	47.84	38.85		63.5	60.5
	39.88	39.24		69	61.5
	56.27	39.74		68.25	47.17
	53.37	44.64		62.71	58.17
		46.09			47.71
		39.29			63.17
		47.84
		45.49
	Table Analyzed	EC Coverage (%)		Table Analyzed	EC Number/Field
	Column B	Yap iEC-KO		Column B	Yap iEC-KO
	vs.	vs,		vs.	vs,
	Column A	Ctrl		Column A	Ctrl
	Unpaired t test			Unpaired t test
	P value	0.0548		P value	0.0387
	P value summary	ns		P value summary	*
	Significantly different (P < 0.05)?	No		Significantly different (P < 0.05)?	Yes
	One- or two-tailed P value?	Two-tailed		One- or two-tailed P value?	Two-tailed
	t, df	t=2,174, df=10		t, df	t=2,471, df=8
	How big is the difference?			How big is the difference?
	Mean of column A	49.34		Mean of column A	65.87
	Mean of column B	42.65		Mean of column B	56.37
	Difference between means (B - A) ± SEM	-6,693 ± 3,078		Difference between means (B - A) ± SEM	-9,495 ± 3,843
	95% confidence interval	-13,55 to 0,1655		95% confidence interval	-18,36 to -0,6331
	R squared (eta squared)	0.321		R squared (eta squared)	0.4328
	F test to compare variances			F test to compare variances
	F, DFn, Dfd	3,767, 3, 7		F, DFn, Dfd	4,877, 5, 3
	P value	0.1349		P value	0.2224
	P value summary	ns		P value summary	ns
	Significantly different (P < 0.05)?	No		Significantly different (P < 0.05)?	No
	Data analyzed			Data analyzed
	Sample size, column A	4		Sample size, column A	4
	Sample size, column B	8		Sample size, column B	6

## Sheet: Extended Data Fig.1i
Extended Data Fig.1i
	EC Coverage (%)			EC Number/Field
	Ctrl	Taz iEC-KO		Ctrl	Taz iEC-KO
	41.6243	28.2843		66.6	42.14
	37.7178	24.75		83	38
	37.8853	33.1547		67.67	30.67
	35.0409	26.8087		72.5	53.88
	44.1986	25.935		81.67	49.63
	43.1899	25.6228		56.67	59.29
	40.4219	22.9003		78.67	54.5
	40.4392	24.94			58.75
		26.3179			36
		27.369			45.67
		31.4583
	Table Analyzed	EC Coverage (%)		Table Analyzed	EC Number/Field
	Column B	Taz iEC-KO		Column B	Taz iEC-KO
	vs.	vs,		vs.	vs,
	Column A	Ctrl		Column A	Ctrl
	Unpaired t test			Unpaired t test
	P value	<0,0001		P value	<0,0001
	P value summary	****		P value summary	****
	Significantly different (P < 0.05)?	Yes		Significantly different (P < 0.05)?	Yes
	One- or two-tailed P value?	Two-tailed		One- or two-tailed P value?	Two-tailed
	t, df	t=9,300, df=17		t, df	t=5,300, df=15
	How big is the difference?			How big is the difference?
	Mean of column A	40.06		Mean of column A	72.4
	Mean of column B	27.05		Mean of column B	46.85
	Difference between means (B - A) ± SEM	-13,02 ± 1,400		Difference between means (B - A) ± SEM	-25,54 ± 4,819
	95% confidence interval	-15,97 to -10,06		95% confidence interval	-35,82 to -15,27
	R squared (eta squared)	0.8357		R squared (eta squared)	0.6519
	F test to compare variances			F test to compare variances
	F, DFn, Dfd	1,042, 7, 10		F, DFn, Dfd	1,101, 9, 6
	P value	0.9209		P value	0.9412
	P value summary	ns		P value summary	ns
	Significantly different (P < 0.05)?	No		Significantly different (P < 0.05)?	No
	Data analyzed			Data analyzed
	Sample size, column A	8		Sample size, column A	7
	Sample size, column B	11		Sample size, column B	10
