# Supplementary material for: A YAP/TAZ-TEAD signalling module links endothelial nutrient acquisition to angiogenic growth
Source: Nat Metab. 2022 Jun 20;4(6):672–82. doi: 10.1038/s42255-022-00584-y (PMC9236904; doi:10.1038/s42255-022-00584-y)
Supplement: Source Data Extended Data Fig. 2 — Statistical source data. [file 42255_2022_584_MOESM19_ESM.xlsx]

## Sheet: Extended Data Fig.2a
Extended Data Fig.2a
		YAP			TAZ
	HAEC	2529	3572	1931	13210	17679	9745
	HMVEC	1589	1424	1439	12575	11198	10972
	HUVEC	3099	3583	3236	15760	17908	18276
	HDLEC	8998	7855	8752	35224	33168	36803
	Table Analyzed	HAEC		Table Analyzed	HMVEC		Table Analyzed	HUVEC		Table Analyzed	HDLEC
	Column B	TAZ		Column B	TAZ		Column B	TAZ		Column B	TAZ
	vs.	vs,		vs.	vs,		vs.	vs,		vs.	vs,
	Column A	YAP		Column A	YAP		Column A	YAP		Column A	YAP
	Unpaired t test			Unpaired t test			Unpaired t test			Unpaired t test
	P value	0.0098		P value	<0,0001		P value	<0,0001		P value	<0,0001
	P value summary	**		P value summary	****		P value summary	****		P value summary	****
	Significantly different (P < 0.05)?	Yes		Significantly different (P < 0.05)?	Yes		Significantly different (P < 0.05)?	Yes		Significantly different (P < 0.05)?	Yes
	One- or two-tailed P value?	Two-tailed		One- or two-tailed P value?	Two-tailed		One- or two-tailed P value?	Two-tailed		One- or two-tailed P value?	Two-tailed
	t, df	t=4,632, df=4		t, df	t=20,05, df=4		t, df	t=17,56, df=4		t, df	t=23,94, df=4
	How big is the difference?			How big is the difference?			How big is the difference?			How big is the difference?
	Mean of column A	2677		Mean of column A	1484		Mean of column A	3306		Mean of column A	8535
	Mean of column B	13545		Mean of column B	11582		Mean of column B	17315		Mean of column B	35065
	Difference between means (B - A) ± SEM	10867 ± 2346		Difference between means (B - A) ± SEM	10098 ± 503,7		Difference between means (B - A) ± SEM	14009 ± 797,7		Difference between means (B - A) ± SEM	26530 ± 1108
	95% confidence interval	4354 to 17381		95% confidence interval	8699 to 11496		95% confidence interval	11794 to 16223		95% confidence interval	23453 to 29607
	R squared (eta squared)	0.8429		R squared (eta squared)	0.9901		R squared (eta squared)	0.9872		R squared (eta squared)	0.9931
	F test to compare variances			F test to compare variances			F test to compare variances			F test to compare variances
	F, DFn, Dfd	22,94, 2, 2		F, DFn, Dfd	90,43, 2, 2		F, DFn, Dfd	29,67, 2, 2		F, DFn, Dfd	9,179, 2, 2
	P value	0.0835		P value	0.0219		P value	0.0652		P value	0.1965
	P value summary	ns		P value summary	*		P value summary	ns		P value summary	ns
	Significantly different (P < 0.05)?	No		Significantly different (P < 0.05)?	Yes		Significantly different (P < 0.05)?	No		Significantly different (P < 0.05)?	No
	Data analyzed			Data analyzed			Data analyzed			Data analyzed
	Sample size, column A	3		Sample size, column A	3		Sample size, column A	3		Sample size, column A	3
	Sample size, column B	3		Sample size, column B	3		Sample size, column B	3		Sample size, column B	3

## Sheet: Extended Data Fig.2e
Extended Data Fig.2e
	Ctgf mRNA
	Taz wt/wt	Taz tag/tag
	1.11	0.59
	0.9	1.06
		1.21
	Table Analyzed	Ctgf mRNA
	Column B	Taz tag/tag
	vs.	vs,
	Column A	Taz wt/wt
	Unpaired t test
	P value	0.8515
	P value summary	ns
	Significantly different (P < 0.05)?	No
	One- or two-tailed P value?	Two-tailed
	t, df	t=0,2038, df=3
	How big is the difference?
	Mean of column A	1.005
	Mean of column B	0.9533
	Difference between means (B - A) ± SEM	-0,05167 ± 0,2535
	95% confidence interval	-0,8584 to 0,7550
	R squared (eta squared)	0.01366
	F test to compare variances
	F, DFn, Dfd
	P value
	P value summary
	Significantly different (P < 0.05)?
	Data analyzed
	Sample size, column A	2
	Sample size, column B	3

## Sheet: Extended Data Fig.2g
Extended Data Fig.2g
	EC area (%)			Number of Ecs
	Taz wt/wt	Taz tag/tag		Taz wt/wt	Taz tag/tag
	46.11	51.35		64.6	73
	45.32	53.72		68.5	75
	56.24	46.14		59.5	71
	49.61	47.74			67
		41.19			55
		53.74			48.5
		49.17			63
		55.53			65.5
					59.33
	Table Analyzed	EC area (%)		Table Analyzed	Endothelial cell number
	Column B	Taz tag/tag		Column B	Taz tag/tag
	vs.	vs,		vs.	vs,
	Column A	Taz wt/wt		Column A	Taz wt/wt
	Unpaired t test			Unpaired t test
	P value	0.8683		P value	0.9924
	P value summary	ns		P value summary	ns
	Significantly different (P < 0.05)?	No		Significantly different (P < 0.05)?	No
	One- or two-tailed P value?	Two-tailed		One- or two-tailed P value?	Two-tailed
	t, df	t=0,1702, df=10		t, df	t=0,009740, df=10
	How big is the difference?			How big is the difference?
	Mean of column A	49.32		Mean of column A	64.2
	Mean of column B	49.82		Mean of column B	64.15
	Difference between means (B - A) ± SEM	0,5025 ± 2,953		Difference between means (B - A) ± SEM	-0,05222 ± 5,362
	95% confidence interval	-6,078 to 7,083		95% confidence interval	-12,00 to 11,89
	R squared (eta squared)	0.002887		R squared (eta squared)	9.486e-06
	F test to compare variances			F test to compare variances
	F, DFn, Dfd	1,095, 3, 7		F, DFn, Dfd	3,719, 8, 2
	P value	0.8246		P value	0.4582
	P value summary	ns		P value summary	ns
	Significantly different (P < 0.05)?	No		Significantly different (P < 0.05)?	No
	Data analyzed			Data analyzed
	Sample size, column A	4		Sample size, column A	3
	Sample size, column B	8		Sample size, column B	9
