# Supplementary material for: A YAP/TAZ-TEAD signalling module links endothelial nutrient acquisition to angiogenic growth
Source: Nat Metab. 2022 Jun 20;4(6):672–82. doi: 10.1038/s42255-022-00584-y (PMC9236904; doi:10.1038/s42255-022-00584-y)
Supplement: Source Data Extended Data Fig. 3 — Statistical source data. [file 42255_2022_584_MOESM21_ESM.xlsx]

## Sheet: Extended Data Fig.3c
Extended Data Fig.3c
		Ctgf mRNA
		Ctrl	TAZ iEC-GOF
		0.98	1.99
		1.18	3.71
		0.86	1.91
		1.33	2.04
		Table Analyzed	Ctgf mRNA
		Column B	TAZ iEC-GOF
		vs.	vs,
		Column A	Ctrl
		Unpaired t test
		P value	0.0249
		P value summary	*
		Significantly different (P < 0.05)?	Yes
		One- or two-tailed P value?	Two-tailed
		t, df	t=2,973, df=6
		How big is the difference?
		Mean of column A	1.088
		Mean of column B	2.413
		Difference between means (B - A) ± SEM	1,325 ± 0,4457
		95% confidence interval	0,2344 to 2,416
		R squared (eta squared)	0.5956
		F test to compare variances
		F, DFn, Dfd	17,24, 3, 3
		P value	0.0428
		P value summary	*
		Significantly different (P < 0.05)?	Yes
		Data analyzed
		Sample size, column A	4
		Sample size, column B	4

## Sheet: Extendend Data Fig.3g
Extended Data Fig.3g
		EC coverage (%)
		Ctrl	Yap/Taz iECKO	Yap/Taz iECKO;Taz iECGOF
		46.11	25.97	41.65
		48.24	38.52	48.31
		40.39	25.61	47.76
		49.4	31.4	35.41
		49.21	29.8	47.1
		49.73	36.5	41.2
		51.71	25.9	34.1
		49.95		39.6
		39.63
		41.53
		36.74
		41.3
		40.41
		41.5
		43.6
		46.1
		Table Analyzed	EC coverage		Table Analyzed	EC coverage
		Column B	Yap/Taz iECKO		Column C	Yap/Taz iECKO;Taz iECGOF
		vs.	vs,		vs.	vs,
		Column A	Ctrl		Column B	Yap/Taz iECKO
		Unpaired t test			Unpaired t test
		P value	<0,0001		P value	0.0013
		P value summary	****		P value summary	**
		Significantly different (P < 0.05)?	Yes		Significantly different (P < 0.05)?	Yes
		One- or two-tailed P value?	Two-tailed		One- or two-tailed P value?	Two-tailed
		t, df	t=6,502, df=21		t, df	t=4,069, df=13
		How big is the difference?			How big is the difference?
		Mean of column A	44.72		Mean of column B	30.53
		Mean of column B	30.53		Mean of column C	41.89
		Difference between means (B - A) ± SEM	-14,19 ± 2,183		Difference between means (C - B) ± SEM	11,36 ± 2,793
		95% confidence interval	-18,73 to -9,654		95% confidence interval	5,330 to 17,40
		R squared (eta squared)	0.6682		R squared (eta squared)	0.5602
		F test to compare variances			F test to compare variances
		F, DFn, Dfd	1,306, 6, 15		F, DFn, Dfd	1,083, 7, 6
		P value	0.6264		P value	0.9387
		P value summary	ns		P value summary	ns
		Significantly different (P < 0.05)?	No		Significantly different (P < 0.05)?	No
		Data analyzed			Data analyzed
		Sample size, column A	16		Sample size, column B	7
		Sample size, column B	7		Sample size, column C	8
