# Supplementary material for: A YAP/TAZ-TEAD signalling module links endothelial nutrient acquisition to angiogenic growth
Source: Nat Metab. 2022 Jun 20;4(6):672–82. doi: 10.1038/s42255-022-00584-y (PMC9236904; doi:10.1038/s42255-022-00584-y)
Supplement: Source Data Extended Data Fig. 4 — Statistical source data. [file 42255_2022_584_MOESM22_ESM.xlsx]

## Sheet: Extended Data Fig.4d
Extended Data Fig.4d
		EC area (%)			EC area (%)			EC area (%)
		Ctrl	Tead2 KO		Ctrl	Tead4 iECKO		Ctrl	Tead1/4 iECKO
		38.89	43.38		34.12	39.06		43.89	34.96
		39.81	42.25		44.36	35.69		37.24	34.81
		38.12	42.81		43.26	36.18		43.25	35.47
			36.46					39.55	36.06
		Table Analyzed	Tead2 KO EC area (%)		Table Analyzed	Tead4 iECKO		Table Analyzed	Tead1/4 iECKO
		Column B	Tead2 KO		Column B	Tead4 iECKO		Column B	Tead1/4 iECKO
		vs.	vs,		vs.	vs,		vs.	vs,
		Column A	Ctrl		Column A	Ctrl		Column A	Ctrl
		Unpaired t test			Unpaired t test			Unpaired t test
		P value	0.2924		P value	0.3504		P value	0.0122
		P value summary	ns		P value summary	ns		P value summary	*
		Significantly different (P < 0.05)?	No		Significantly different (P < 0.05)?	No		Significantly different (P < 0.05)?	Yes
		One- or two-tailed P value?	Two-tailed		One- or two-tailed P value?	Two-tailed		One- or two-tailed P value?	Two-tailed
		t, df	t=1,176, df=5		t, df	t=1,056, df=4		t, df	t=3,542, df=6
		How big is the difference?			How big is the difference?			How big is the difference?
		Mean of column A	38.94		Mean of column A	40.58		Mean of column A	40.98
		Mean of column B	41.23		Mean of column B	36.98		Mean of column B	35.33
		Difference between means (B - A) ± SEM	2,285 ± 1,943		Difference between means (B - A) ± SEM	-3,603 ± 3,412		Difference between means (B - A) ± SEM	-5,658 ± 1,597
		95% confidence interval	-2,708 to 7,278		95% confidence interval	-13,08 to 5,869		95% confidence interval	-9,566 to -1,749
		R squared (eta squared)	0.2168		R squared (eta squared)	0.2181		R squared (eta squared)	0.6765
		F test to compare variances			F test to compare variances			F test to compare variances
		F, DFn, Dfd	14,39, 3, 2		F, DFn, Dfd	9,532, 2, 2		F, DFn, Dfd	30,90, 3, 3
		P value	0.1313		P value	0.1899		P value	0.0187
		P value summary	ns		P value summary	ns		P value summary	*
		Significantly different (P < 0.05)?	No		Significantly different (P < 0.05)?	No		Significantly different (P < 0.05)?	Yes
		Data analyzed			Data analyzed			Data analyzed
		Sample size, column A	3		Sample size, column A	3		Sample size, column A	4
		Sample size, column B	4		Sample size, column B	3		Sample size, column B	4
