# Supplementary material for: A YAP/TAZ-TEAD signalling module links endothelial nutrient acquisition to angiogenic growth
Source: Nat Metab. 2022 Jun 20;4(6):672–82. doi: 10.1038/s42255-022-00584-y (PMC9236904; doi:10.1038/s42255-022-00584-y)
Supplement: Source Data Extended Data Fig. 5 — Statistical source data. [file 42255_2022_584_MOESM24_ESM.xlsx]

## Sheet: Extended Data Fig.5b
Extended Data Fig.5b
		ANKRD1			CTGF			CYR61
		Ctrl	iYAPS127A	iTAZS89A	Ctrl	iYAPS127A	iTAZS89A	Ctrl	iYAPS127A	iTAZS89A
		1.62259	4.2472	4.34723	1.55119	1.43557	1.64695	1.08431	3.13273	2.61946
		1.28524	5.26049	4.2231	1.41362	1.50889	2.39176	0.9469	3.66157	2.82606
		2.1719	2.00032	2.47902	1.49468	1.56654	2.37867	1.12502	2.37676	2.83408
		0.752693	3.77337	5.21725	0.832124	2.09219	4.90242	1.17336	1.7034	2.45952
		0.579178	4.94303	5.75658	0.603189	4.25265	3.74344	0.812562	3.018	2.77624
		1.00741	2.3362	3.22328	0.853894	2.30176	1.74613	0.794824	3.52333	2.57081
		0.950769	2.75965	3.18208	1.02439	1.88626	1.35729	0.851107	3.07492	2.36809
		0.973876	2.47163	3.13452	0.953705	1.7837	1.57725	0.827147	3.13265	2.20938
		Table Analyzed	YAP ANKRD1		Table Analyzed	TAZ ANKRD1		Table Analyzed	YAP CTGF		Table Analyzed	TAZ CTGF		Table Analyzed	YAP CYR61		Table Analyzed	TAZ CYR61
		Column B	iYAPS127A		Column B	iTAZS89A		Column B	iYAPS127A		Column B	iTAZS89A		Column B	iYAPS127A		Column B	iTAZS89A
		vs.	vs,		vs.	vs,		vs.	vs,		vs.	vs,		vs.	vs,		vs.	vs,
		Column A	Ctrl		Column A	Ctrl		Column A	Ctrl		Column A	Ctrl		Column A	Ctrl		Column A	Ctrl
		Unpaired t test			Unpaired t test			Unpaired t test			Unpaired t test			Unpaired t test			Unpaired t test
		P value	0.0003		P value	<0,0001		P value	0.0113		P value	0.0092		P value	<0,0001		P value	<0,0001
		P value summary	***		P value summary	****		P value summary	*		P value summary	**		P value summary	****		P value summary	****
		Significantly different (P < 0.05)?	Yes		Significantly different (P < 0.05)?	Yes		Significantly different (P < 0.05)?	Yes		Significantly different (P < 0.05)?	Yes		Significantly different (P < 0.05)?	Yes		Significantly different (P < 0.05)?	Yes
		One- or two-tailed P value?	Two-tailed		One- or two-tailed P value?	Two-tailed		One- or two-tailed P value?	Two-tailed		One- or two-tailed P value?	Two-tailed		One- or two-tailed P value?	Two-tailed		One- or two-tailed P value?	Two-tailed
		t, df	t=4,809, df=14		t, df	t=6,294, df=14		t, df	t=2,915, df=14		t, df	t=3,019, df=14		t, df	t=8,688, df=14		t, df	t=16,79, df=14
		How big is the difference?			How big is the difference?			How big is the difference?			How big is the difference?			How big is the difference?			How big is the difference?
		Mean of column A	1.168		Mean of column A	1.168		Mean of column A	1.091		Mean of column A	1.091		Mean of column A	0.9519		Mean of column A	0.9519
		Mean of column B	3.474		Mean of column B	3.945		Mean of column B	2.103		Mean of column B	2.468		Mean of column B	2.953		Mean of column B	2.583
		Difference between means (B - A) ± SEM	2,306 ± 0,4795		Difference between means (B - A) ± SEM	2,777 ± 0,4413		Difference between means (B - A) ± SEM	1,013 ± 0,3474		Difference between means (B - A) ± SEM	1,377 ± 0,4562		Difference between means (B - A) ± SEM	2,001 ± 0,2303		Difference between means (B - A) ± SEM	1,631 ± 0,09713
		95% confidence interval	1,278 to 3,334		95% confidence interval	1,831 to 3,724		95% confidence interval	0,2675 to 1,758		95% confidence interval	0,3988 to 2,356		95% confidence interval	1,507 to 2,495		95% confidence interval	1,423 to 1,839
		R squared (eta squared)	0.6229		R squared (eta squared)	0.7388		R squared (eta squared)	0.3776		R squared (eta squared)	0.3943		R squared (eta squared)	0.8435		R squared (eta squared)	0.9527
		F test to compare variances			F test to compare variances			F test to compare variances			F test to compare variances			F test to compare variances			F test to compare variances
		F, DFn, Dfd	5,930, 7, 7		F, DFn, Dfd	4,870, 7, 7		F, DFn, Dfd	6,829, 7, 7		F, DFn, Dfd	12,50, 7, 7		F, DFn, Dfd	16,86, 7, 7		F, DFn, Dfd	2,175, 7, 7
		P value	0.0316		P value	0.0534		P value	0.0214		P value	0.0036		P value	0.0014		P value	0.3268
		P value summary	*		P value summary	ns		P value summary	*		P value summary	**		P value summary	**		P value summary	ns
		Significantly different (P < 0.05)?	Yes		Significantly different (P < 0.05)?	No		Significantly different (P < 0.05)?	Yes		Significantly different (P < 0.05)?	Yes		Significantly different (P < 0.05)?	Yes		Significantly different (P < 0.05)?	No
		Data analyzed			Data analyzed			Data analyzed			Data analyzed			Data analyzed			Data analyzed
		Sample size, column A	8		Sample size, column A	8		Sample size, column A	8		Sample size, column A	8		Sample size, column A	8		Sample size, column A	8
		Sample size, column B	8		Sample size, column B	8		Sample size, column B	8		Sample size, column B	8		Sample size, column B	8		Sample size, column B	8
