# Supplementary material for: A YAP/TAZ-TEAD signalling module links endothelial nutrient acquisition to angiogenic growth
Source: Nat Metab. 2022 Jun 20;4(6):672–82. doi: 10.1038/s42255-022-00584-y (PMC9236904; doi:10.1038/s42255-022-00584-y)
Supplement: Source Data Extended Data Fig. 6 — Statistical source data. [file 42255_2022_584_MOESM25_ESM.xlsx]

## Sheet: Extended Data Fig.6a
Extended Data Fig.6a
		pS6KThr389/S6K
		Ctrl	iYAP S127A	iTAZ S89A
		1.14565	3.13	1.90884
		1.28279	3.838	3.99781
		1.54737	2.306	2.02204
		0.727	3.837	3.069
		0.865	3.3966	2.86816
		0.432509	2.838	1.68758
		Table Analyzed	pS6K/S6K		Table Analyzed	pS6K/S6K
		Column B	iYAP S127A		Column C	iTAZ S89A
		vs.	vs,		vs.	vs,
		Column A	Ctrl		Column A	Ctrl
		Unpaired t test			Unpaired t test
		P value	<0,0001		P value	0.0024
		P value summary	****		P value summary	**
		Significantly different (P < 0.05)?	Yes		Significantly different (P < 0.05)?	Yes
		One- or two-tailed P value?	Two-tailed		One- or two-tailed P value?	Two-tailed
		t, df	t=7,557, df=10		t, df	t=4,020, df=10
		How big is the difference?			How big is the difference?
		Mean of column A	1		Mean of column A	1
		Mean of column B	3.224		Mean of column C	2.592
		Difference between means (B - A) ± SEM	2,224 ± 0,2943		Difference between means (C - A) ± SEM	1,592 ± 0,3960
		95% confidence interval	1,568 to 2,880		95% confidence interval	0,7098 to 2,475
		R squared (eta squared)	0.851		R squared (eta squared)	0.6178
		F test to compare variances			F test to compare variances
		F, DFn, Dfd	2,186, 5, 5		F, DFn, Dfd	4,769, 5, 5
		P value	0.4108		P value	0.1115
		P value summary	ns		P value summary	ns
		Significantly different (P < 0.05)?	No		Significantly different (P < 0.05)?	No
		Data analyzed			Data analyzed
		Sample size, column A	6		Sample size, column A	6
		Sample size, column B	6		Sample size, column C	6

## Sheet: Extended Data Fig.6b
Extended Data Fig.6b
		pS6235/236
		iCtrl	iYAP S127A	iTAZ S89A
		0.702878	4.95145	2.87743
		1.29712	6.66705	3.27597
		1	1.80678	1.53454
		1.28937	1.88635	1.77136
		Table Analyzed	pS6235/236		Table Analyzed	pS6235/236
		Column B	iYAP S127A		Column C	iTAZ S89A
		vs.	vs,		vs.	vs,
		Column A	iCtrl		Column A	iCtrl
		Unpaired t test			Unpaired t test
		P value	0.0622		P value	0.0271
		P value summary	ns		P value summary	*
		Significantly different (P < 0.05)?	No		Significantly different (P < 0.05)?	Yes
		One- or two-tailed P value?	Two-tailed		One- or two-tailed P value?	Two-tailed
		t, df	t=2,287, df=6		t, df	t=2,906, df=6
		How big is the difference?			How big is the difference?
		Mean of column A	1.072		Mean of column A	1.072
		Mean of column B	3.828		Mean of column C	2.365
		Difference between means (B - A) ± SEM	2,756 ± 1,205		Difference between means (C - A) ± SEM	1,292 ± 0,4448
		95% confidence interval	-0,1923 to 5,703		95% confidence interval	0,2042 to 2,381
		R squared (eta squared)	0.4658		R squared (eta squared)	0.5846
		F test to compare variances			F test to compare variances
		F, DFn, Dfd	71,76, 3, 3		F, DFn, Dfd	8,918, 3, 3
		P value	0.0054		P value	0.1054
		P value summary	**		P value summary	ns
		Significantly different (P < 0.05)?	Yes		Significantly different (P < 0.05)?	No
		Data analyzed			Data analyzed
		Sample size, column A	4		Sample size, column A	4
		Sample size, column B	4		Sample size, column C	4

## Sheet: Extended Data Fig.6c
Extended Data Fig.6c
		pS6 240/244
		iCtrl	iYAP S127A	iTAZ S89A
		0.998721	2.37227	1.90387
		1.00128	2.61469	1.48186
		1	1.3295	1.28582
		1.08215	1.32905	1.28288
		Table Analyzed	pS6240/244		Table Analyzed	pS6240/244
		Column B	iYAP S127A		Column C	iTAZ S89A
		vs.	vs,		vs.	vs,
		Column A	iCtrl		Column A	iCtrl
		Unpaired t test			Unpaired t test
		P value	0.0397		P value	0.0192
		P value summary	*		P value summary	*
		Significantly different (P < 0.05)?	Yes		Significantly different (P < 0.05)?	Yes
		One- or two-tailed P value?	Two-tailed		One- or two-tailed P value?	Two-tailed
		t, df	t=2,618, df=6		t, df	t=3,174, df=6
		How big is the difference?			How big is the difference?
		Mean of column A	1.021		Mean of column A	1.021
		Mean of column B	1.911		Mean of column C	1.489
		Difference between means (B - A) ± SEM	0,8908 ± 0,3403		Difference between means (C - A) ± SEM	0,4681 ± 0,1475
		95% confidence interval	0,05810 to 1,724		95% confidence interval	0,1072 to 0,8289
		R squared (eta squared)	0.5331		R squared (eta squared)	0.6267
		F test to compare variances			F test to compare variances
		F, DFn, Dfd	273,4, 3, 3		F, DFn, Dfd	50,53, 3, 3
		P value	0.0007		P value	0.0091
		P value summary	***		P value summary	**
		Significantly different (P < 0.05)?	Yes		Significantly different (P < 0.05)?	Yes
		Data analyzed			Data analyzed
		Sample size, column A	4		Sample size, column A	4
		Sample size, column B	4		Sample size, column C	4

## Sheet: Extended Data Fig.6d
Extended Data Fig.6d
		DNA Synthesis
		Ctrl	iYAP S127A	iTAZ S89A
		0.93	1.02	0.92
		0.91	1.26	0.94
		1.15	1.24	0.75
		0.96	1.61	2.15
		1.29	2.01	1.62
		0.75	1.82	1.94
		0.91	1.08	2.49
		0.97	1.08	2.76
		1.12	0.99	0.75
		1.14	1.27	1.22
		0.33		0.86
		1.53
		Table Analyzed	DNA synthesis		Table Analyzed	DNA synthesis
		Column B	iYAP S127A		Column C	iTAZ S89A
		vs.	vs,		vs.	vs,
		Column A	Ctrl		Column A	Ctrl
		Unpaired t test			Unpaired t test
		P value	0.0237		P value	0.0451
		P value summary	*		P value summary	*
		Significantly different (P < 0.05)?	Yes		Significantly different (P < 0.05)?	Yes
		One- or two-tailed P value?	Two-tailed		One- or two-tailed P value?	Two-tailed
		t, df	t=2,448, df=20		t, df	t=2,131, df=21
		How big is the difference?			How big is the difference?
		Mean of column A	0.9992		Mean of column A	0.9992
		Mean of column B	1.338		Mean of column C	1.491
		Difference between means (B - A) ± SEM	0,3388 ± 0,1384		Difference between means (C - A) ± SEM	0,4917 ± 0,2307
		95% confidence interval	0,05010 to 0,6276		95% confidence interval	0,01189 to 0,9716
		R squared (eta squared)	0.2305		R squared (eta squared)	0.1778
		F test to compare variances			F test to compare variances
		F, DFn, Dfd	1,448, 9, 11		F, DFn, Dfd	6,280, 10, 11
		P value	0.554		P value	0.0055
		P value summary	ns		P value summary	**
		Significantly different (P < 0.05)?	No		Significantly different (P < 0.05)?	Yes
		Data analyzed			Data analyzed
		Sample size, column A	12		Sample size, column A	12
		Sample size, column B	10		Sample size, column C	11

## Sheet: Extended Data Fig.6e
Extended Data Fig.6e
		Protein synthesis
		Ctrl	iYAP S127A	iTAZ S89A
		0.85	0.98	1.18
		1.03	1.4	1.14
		1.12	1.33	1.36
		0.94	1.05	1.37
		1.02	1.31	1.77
		1.05	1.23	1.44
		0.91	1.19	1.2
		1.05	1.36	1.23
		1.04	1.24	1.51
		0.75	1.64	1.54
		1.01	1.58	1.46
		1.24	1.34	2.3
		0.67	1.59	1.84
		1.05	1.5	1.39
		1.27	1.6	1.5
		0.68	1.32	1.88
		1.07
		1.25
		Table Analyzed	Protein synthesis		Table Analyzed	Protein synthesis
		Column B	iYAP S127A		Column C	iTAZ S89A
		vs.	vs,		vs.	vs,
		Column A	Ctrl		Column A	Ctrl
		Unpaired t test			Unpaired t test
		P value	<0,0001		P value	<0,0001
		P value summary	****		P value summary	****
		Significantly different (P < 0.05)?	Yes		Significantly different (P < 0.05)?	Yes
		One- or two-tailed P value?	Two-tailed		One- or two-tailed P value?	Two-tailed
		t, df	t=5,566, df=32		t, df	t=5,971, df=32
		How big is the difference?			How big is the difference?
		Mean of column A	1		Mean of column A	1
		Mean of column B	1.354		Mean of column C	1.507
		Difference between means (B - A) ± SEM	0,3538 ± 0,06355		Difference between means (C - A) ± SEM	0,5069 ± 0,08489
		95% confidence interval	0,2243 to 0,4832		95% confidence interval	0,3340 to 0,6798
		R squared (eta squared)	0.4919		R squared (eta squared)	0.527
		F test to compare variances			F test to compare variances
		F, DFn, Dfd	1,204, 15, 17		F, DFn, Dfd	3,037, 15, 17
		P value	0.7069		P value	0.0304
		P value summary	ns		P value summary	*
		Significantly different (P < 0.05)?	No		Significantly different (P < 0.05)?	Yes
		Data analyzed			Data analyzed
		Sample size, column A	18		Sample size, column A	18
		Sample size, column B	16		Sample size, column C	16

## Sheet: Extended Data Fig.6f
Extended Data Fig.6f
		Cell proliferation
		Ctrl	iYAP S127A	iTAZ S89A
		1.01	1.77	1.65
		1	1.77	1.63
		0.98	1.56	1.93
		0.92	0.79	1.17
		0.92	1	1.4
		1.16	1.1	1.3
		1.05	1.3	2
		1.16	1.52	1.51
		0.78	1.38	1.45
		1	1.35	1.75
		1.11	1.43	1.65
		0.89	1.25	1.52
		1.01	1.45	1.65
		0.97	1.36	1.62
		1.02	1.46	1.66
		Table Analyzed	Cell proliferation		Table Analyzed	Cell proliferation
		Column B	iYAP S127A		Column C	iTAZ S89A
		vs.	vs,		vs.	vs,
		Column A	Ctrl		Column A	Ctrl
		Unpaired t test			Unpaired t test
		P value	<0,0001		P value	<0,0001
		P value summary	****		P value summary	****
		Significantly different (P < 0.05)?	Yes		Significantly different (P < 0.05)?	Yes
		One- or two-tailed P value?	Two-tailed		One- or two-tailed P value?	Two-tailed
		t, df	t=5,067, df=28		t, df	t=9,649, df=28
		How big is the difference?			How big is the difference?
		Mean of column A	0.9987		Mean of column A	0.9987
		Mean of column B	1.366		Mean of column C	1.593
		Difference between means (B - A) ± SEM	0,3673 ± 0,07249		Difference between means (C - A) ± SEM	0,5940 ± 0,06156
		95% confidence interval	0,2188 to 0,5158		95% confidence interval	0,4679 to 0,7201
		R squared (eta squared)	0.4784		R squared (eta squared)	0.7688
		F test to compare variances			F test to compare variances
		F, DFn, Dfd	6,828, 14, 14		F, DFn, Dfd	4,646, 14, 14
		P value	0.0009		P value	0.0069
		P value summary	***		P value summary	**
		Significantly different (P < 0.05)?	Yes		Significantly different (P < 0.05)?	Yes
		Data analyzed			Data analyzed
		Sample size, column A	15		Sample size, column A	15
		Sample size, column B	15		Sample size, column C	15

## Sheet: Extended Data Fig.6g
Extended Data Fig.6g
			LentiCtrl									LentiYAP S127A									LentiTAZ S89A
		0	13750	12500	18750	13750	10000	11250	18750	17500	18750	12500	21250	13750	13750	20000	12500	18750	21250	18750	17500	20000	16250	12500	10000	13750	21250	16250	16250
		24	31250	31250	35000	25000	18750	23750	21250	36250	23750	30000	25000	25000	20000	25000	18750	42500	37500	40000	36250	38750	35000	18750	30000	32500	42500	36250	37500
		48	73750	81250	67500	43750	31250	28750	61250	41250	48750	105000	87500	88750	31250	32500	43750	66250	75000	80000	107500	128750	112500	48750	47500	47500	112500	130000	123750
		72	112500	108750	113750	45000	38750	46250	106250	108750	98750	190000	198750	212500	93750	85000	98750	156250	137500	165000	421250	373750	362500	115000	125000	137500	290000	302500	297500
		96	212500	186250	183750	93750	90000	85000	193750	170000	172500	457500	498750	456250	238750	191250	223750	342500	358750	336250	837500	812500	878750	321250	330000	280000	695000	681250	742500
		Table Analyzed	24 hrs		Table Analyzed	24 hrs		Table Analyzed	48 hrs		Table Analyzed	48 hrs		Table Analyzed	72 hrs		Table Analyzed	72 hrs		Table Analyzed	96 hrs		Table Analyzed	96 hrs
		Column A	CTL		Column A	CTL		Column A	CTL		Column A	CTL		Column A	CTL		Column A	CTL		Column A	CTL		Column A	CTL
		vs.	vs,		vs.	vs,		vs.	vs,		vs.	vs,		vs.	vs,		vs.	vs,		vs.	vs,		vs.	vs,
		Column B	YAP		Column C	TAZ		Column B	YAP		Column C	TAZ		Column B	YAP		Column C	TAZ		Column B	YAP		Column C	TAZ
		Unpaired t test			Unpaired t test			Unpaired t test			Unpaired t test			Unpaired t test			Unpaired t test			Unpaired t test			Unpaired t test
		P value	0.5941		P value	0.0416		P value	0.1914		P value	0.0068		P value	0.0054		P value	0.0003		P value	0.0002		P value	<0,0001
		P value summary	ns		P value summary	*		P value summary	ns		P value summary	**		P value summary	**		P value summary	***		P value summary	***		P value summary	****
		Significantly different (P < 0.05)?	No		Significantly different (P < 0.05)?	Yes		Significantly different (P < 0.05)?	No		Significantly different (P < 0.05)?	Yes		Significantly different (P < 0.05)?	Yes		Significantly different (P < 0.05)?	Yes		Significantly different (P < 0.05)?	Yes		Significantly different (P < 0.05)?	Yes
		One- or two-tailed P value?	Two-tailed		One- or two-tailed P value?	Two-tailed		One- or two-tailed P value?	Two-tailed		One- or two-tailed P value?	Two-tailed		One- or two-tailed P value?	Two-tailed		One- or two-tailed P value?	Two-tailed		One- or two-tailed P value?	Two-tailed		One- or two-tailed P value?	Two-tailed
		t, df	t=0,5438, df=16		t, df	t=2,215, df=16		t, df	t=1,364, df=16		t, df	t=3,103, df=16		t, df	t=3,214, df=16		t, df	t=4,565, df=16		t, df	t=4,699, df=16		t, df	t=5,676, df=16
		How big is the difference?			How big is the difference?			How big is the difference?			How big is the difference?			How big is the difference?			How big is the difference?			How big is the difference?			How big is the difference?
		Mean of column A	27361		Mean of column A	27361		Mean of column A	53056		Mean of column A	53056		Mean of column A	86528		Mean of column A	86528		Mean of column A	154167		Mean of column A	154167
		Mean of column B	29306		Mean of column C	34167		Mean of column B	67778		Mean of column C	95417		Mean of column B	148611		Mean of column C	269444		Mean of column B	344861		Mean of column C	619861
		Difference between means (A - B) ± SEM	-1944 ± 3576		Difference between means (A - C) ± SEM	-6806 ± 3072		Difference between means (A - B) ± SEM	-14722 ± 10791		Difference between means (A - C) ± SEM	-42361 ± 13652		Difference between means (A - B) ± SEM	-62083 ± 19319		Difference between means (A - C) ± SEM	-182917 ± 40067		Difference between means (A - B) ± SEM	-190694 ± 40584		Difference between means (A - C) ± SEM	-465694 ± 82045
		95% confidence interval	-9524 to 5635		95% confidence interval	-13318 to -293,0		95% confidence interval	-37598 to 8154		95% confidence interval	-71302 to -13420		95% confidence interval	-103038 to -21129		95% confidence interval	-267854 to -97979		95% confidence interval	-276728 to -104661		95% confidence interval	-639622 to -291767
		R squared (eta squared)	0.01815		R squared (eta squared)	0.2347		R squared (eta squared)	0.1042		R squared (eta squared)	0.3757		R squared (eta squared)	0.3923		R squared (eta squared)	0.5657		R squared (eta squared)	0.5798		R squared (eta squared)	0.6682
		F test to compare variances			F test to compare variances			F test to compare variances			F test to compare variances			F test to compare variances			F test to compare variances			F test to compare variances			F test to compare variances
		F, DFn, Dfd	1,962, 8, 8		F, DFn, Dfd	1,187, 8, 8		F, DFn, Dfd	1,984, 8, 8		F, DFn, Dfd	3,776, 8, 8		F, DFn, Dfd	2,135, 8, 8		F, DFn, Dfd	12,49, 8, 8		F, DFn, Dfd	4,926, 8, 8		F, DFn, Dfd	23,22, 8, 8
		P value	0.3599		P value	0.8147		P value	0.3521		P value	0.078		P value	0.3039		P value	0.0018		P value	0.0369		P value	0.0002
		P value summary	ns		P value summary	ns		P value summary	ns		P value summary	ns		P value summary	ns		P value summary	**		P value summary	*		P value summary	***
		Significantly different (P < 0.05)?	No		Significantly different (P < 0.05)?	No		Significantly different (P < 0.05)?	No		Significantly different (P < 0.05)?	No		Significantly different (P < 0.05)?	No		Significantly different (P < 0.05)?	Yes		Significantly different (P < 0.05)?	Yes		Significantly different (P < 0.05)?	Yes
		Data analyzed			Data analyzed			Data analyzed			Data analyzed			Data analyzed			Data analyzed			Data analyzed			Data analyzed
		Sample size, column A	9		Sample size, column A	9		Sample size, column A	9		Sample size, column A	9		Sample size, column A	9		Sample size, column A	9		Sample size, column A	9		Sample size, column A	9
		Sample size, column B	9		Sample size, column C	9		Sample size, column B	9		Sample size, column C	9		Sample size, column B	9		Sample size, column C	9		Sample size, column B	9		Sample size, column C	9

## Sheet: Extended Data Fig.6h
Extended Data Fig.6h
		pThr389-S6K/S6K
		siCtrl	siYAP/TAZ
		0.521	0.314
		0.397	0.529773
		1.23	0.351
		1.206	0.27266
		1.6	0.088
		0.487	0.184612
		1.405	0.388
		1.154	0.679273
		Table Analyzed	pThr389-S6K/S6K
		Column B	siYAP/TAZ
		vs.	vs,
		Column A	siCtrl
		Unpaired t test
		P value	0.0025
		P value summary	**
		Significantly different (P < 0.05)?	Yes
		One- or two-tailed P value?	Two-tailed
		t, df	t=3,677, df=14
		How big is the difference?
		Mean of column A	1
		Mean of column B	0.3509
		Difference between means (B - A) ± SEM	-0,6491 ± 0,1765
		95% confidence interval	-1,028 to -0,2705
		R squared (eta squared)	0.4913
		F test to compare variances
		F, DFn, Dfd	6,108, 7, 7
		P value	0.0292
		P value summary	*
		Significantly different (P < 0.05)?	Yes
		Data analyzed
		Sample size, column A	8
		Sample size, column B	8

## Sheet: Extended Data Fig.6i
Extended Data Fig.6i
		pSer235/236-S6/S6
		siCtrl	siYAP/TAZ
		1.576	0.098
		1.747	0.114365
		0.772	0.211
		0.883	0.238891
		0.874	0.154
		0.782	0.257712
		0.702	0.277
		0.663	0.379569
		Table Analyzed	pSer235/236-S6/S6
		Column B	siYAP/TAZ
		vs.	vs,
		Column A	siCtrl
		Unpaired t test
		P value	0.0001
		P value summary	***
		Significantly different (P < 0.05)?	Yes
		One- or two-tailed P value?	Two-tailed
		t, df	t=5,179, df=14
		How big is the difference?
		Mean of column A	0.9999
		Mean of column B	0.2163
		Difference between means (B - A) ± SEM	-0,7836 ± 0,1513
		95% confidence interval	-1,108 to -0,4590
		R squared (eta squared)	0.657
		F test to compare variances
		F, DFn, Dfd	20,07, 7, 7
		P value	0.0008
		P value summary	***
		Significantly different (P < 0.05)?	Yes
		Data analyzed
		Sample size, column A	8
		Sample size, column B	8

## Sheet: Extended Data Fig.6j
Extended Data Fig.6j
		pSer240/244-S6/S6
		siCtrl	siYAP/TAZ
		1.03917	0.282107
		0.960826	0.334678
		1.07245	0.679732
		0.927553	0.631845
		1	0.0901744
		1	0.195216
		Table Analyzed	pSer240/244-S6/S6
		Column A	siCTL
		vs.	vs,
		Column B	siYAP/TAZ
		Unpaired t test
		P value	<0,0001
		P value summary	****
		Significantly different (P < 0.05)?	Yes
		One- or two-tailed P value?	Two-tailed
		t, df	t=6,354, df=10
		How big is the difference?
		Mean of column A	1
		Mean of column B	0.369
		Difference between means (A - B) ± SEM	0,6310 ± 0,09931
		95% confidence interval	0,4098 to 0,8523
		R squared (eta squared)	0.8015
		F test to compare variances
		F, DFn, Dfd	20,81, 5, 5
		P value	0.0047
		P value summary	**
		Significantly different (P < 0.05)?	Yes
		Data analyzed
		Sample size, column A	6
		Sample size, column B	6

[truncated: 7 more sheets: Extended Data Fig.6k, Extended Data Fig.6l, Extended Data Fig.6m, Extended Data Fig.6n, Extended Data Fig.6o, Extended Data Fig.6p, Extended Data Fig.6q]
