# Supplementary material for: A YAP/TAZ-TEAD signalling module links endothelial nutrient acquisition to angiogenic growth
Source: Nat Metab. 2022 Jun 20;4(6):672–82. doi: 10.1038/s42255-022-00584-y (PMC9236904; doi:10.1038/s42255-022-00584-y)
Supplement: Source Data Extended Data Fig. 7 — Statistical source data. [file 42255_2022_584_MOESM26_ESM.xlsx]

## Sheet: Extended Data Fig.7d
Extended Data Fig.7d
		pSer235/236-S6+ ECs
		Control	Taz iECGOF
		1.74	1.2
		1.48	1.7
		0.96	2.22
		0.77	1.38
		0.62	0.84
		0.71	3.01
		1.52	1.89
		0.54	0.95
		0.77	1.84
		0.58	2.32
		0.56
		0.64
		0.96
		0.53
		Table Analyzed	pSer235/236-S6+ Ecs
		Column A	Control
		vs	vs
		Column B	TAZ iECGOF
		Unpaired t test
		P value	0.0008
		P value summary	***
		Are means signif. different? (P < 0.05)	Yes
		One- or two-tailed P value?	Two-tailed
		t, df	t=3,871 df=22
		How big is the difference?
		Mean ± SEM of column A	0,8843 ± 0,1082 N=14
		Mean ± SEM of column B	1,735 ± 0,2126 N=10
		Difference between means	-0,8507 ± 0,2198
		95% confidence interval	-1,307 to -0,3949
		R square	0.4051
		F test to compare variances
		F,DFn, Dfd	2,759, 9, 13
		P value	0.0948
		P value summary	ns
		Are variances significantly different?	No

## Sheet: Extended Data Fig.7e
Extended Data Fig.7e
		pSer235/236-S6+ ECs
		Control	Yap/Taz iECKO
		1.07	0.6
		0.76	0.51
		1.42	0.6
		0.7	0.82
		1.33	0.51
		0.97	0.72
		0.75	0.59
			0.83
		Table Analyzed	pSer235/236-S6+ ECs
		Column B	Yap/Taz iECKO
		vs.	vs,
		Column A	Control
		Unpaired t test
		P value	0.008
		P value summary	**
		Significantly different (P < 0.05)?	Yes
		One- or two-tailed P value?	Two-tailed
		t, df	t=3,131, df=13
		How big is the difference?
		Mean of column A	1
		Mean of column B	0.6475
		Difference between means (B - A) ± SEM	-0,3525 ± 0,1126
		95% confidence interval	-0,5957 to -0,1093
		R squared (eta squared)	0.4299
		F test to compare variances
		F, DFn, Dfd	5,131, 6, 7
		P value	0.0497
		P value summary	*
		Significantly different (P < 0.05)?	Yes
		Data analyzed
		Sample size, column A	7
		Sample size, column B	8

## Sheet: Extended Data Fig.7f
Extended Data Fig.7f
		pSer235/236-S6+ ECs
		Ctrl	Tead1/2/4 iEC-KO
		1.51	0.68
		0.95	0.712
		0.908	0.457
		1.25	0.742
		1.08
		1.11
		1.36
		0.83
		1.1
		0.774
		Table Analyzed	pSer235/236-S6+ ECs
		Column B	Tead1/2/4 iEC-KO
		vs.	vs,
		Column A	Ctrl
		Unpaired t test
		P value	0.0045
		P value summary	**
		Significantly different (P < 0.05)?	Yes
		One- or two-tailed P value?	Two-tailed
		t, df	t=3,482, df=12
		How big is the difference?
		Mean of column A	1.087
		Mean of column B	0.6478
		Difference between means (B - A) ± SEM	-0,4395 ± 0,1262
		95% confidence interval	-0,7144 to -0,1645
		R squared (eta squared)	0.5026
		F test to compare variances
		F, DFn, Dfd	3,275, 9, 3
		P value	0.3579
		P value summary	ns
		Significantly different (P < 0.05)?	No
		Data analyzed
		Sample size, column A	10
		Sample size, column B	4
