# Supplementary material for: A YAP/TAZ-TEAD signalling module links endothelial nutrient acquisition to angiogenic growth
Source: Nat Metab. 2022 Jun 20;4(6):672–82. doi: 10.1038/s42255-022-00584-y (PMC9236904; doi:10.1038/s42255-022-00584-y)
Supplement: Source Data Extended Data Fig. 8 — Statistical source data. [file 42255_2022_584_MOESM28_ESM.xlsx]

## Sheet: Extended Data Fig.8d
Extended Data Fig.8d
	Glycine		Alanine		Serine		Threonine		Cysteine		Valine		Leucine		Isoleucine		Methionine		Proline
	siCtrl	siYAP/TAZ	siCtrl	siYAP/TAZ	siCtrl	siYAP/TAZ	siCtrl	siYAP/TAZ	siCtrl	siYAP/TAZ	siCtrl	siYAP/TAZ	siCtrl	siYAP/TAZ	siCtrl	siYAP/TAZ	siCtrl	siYAP/TAZ	siCtrl	siYAP/TAZ
	0.36	0.9	42.91	143.79	-25.5	-17.9	-33.85	5.74	-8.45	-11.39	-375.46	-224.2	-1297.62	-2663.41	136.55	464.66	-107.11	-61.48	160.59	353.89
	0.09	0.16	45.1	72.11	-14.9	-8.31	-29.08	26.46	-9.19	-4.58	-164.14	-281.48	-860.64	-1862.64	-93.29	412.41	-102.67	-50.65	118.63	392.29
	0.93	0.7	42.82	105.22	-15.24	-13.67	-2.27	2.22	-5.88	-11.82	-138.33	-84.35	-1314.56	-2049.84	2.52	313.49	-60.12	-90.82	207.17	347.96
	Phenylalanine		Tyrosine		Tryptophan		Aspartate		Glutamate		Asparagine		Glutamine		Histidine		Lysine		Arginine
	siCtrl	siYAP/TAZ	siCtrl	siYAP/TAZ	siCtrl	siYAP/TAZ	siCtrl	siYAP/TAZ	siCtrl	siYAP/TAZ	siCtrl	siYAP/TAZ	siCtrl	siYAP/TAZ	siCtrl	siYAP/TAZ	siCtrl	siYAP/TAZ	siCtrl	siYAP/TAZ
	-184.94	-48.21	-40.95	-25.08	-25.71	-4.86	2.56	-36.13	86.36	156.44	-5.39	-2.15	-1012.56	-375.45	-474.78	-344.76	-30.84	-5.54	51.72	145.97
	-176.19	140.5	-34.1	1.17	-18.48	-9	-7.2	-4.78	67.75	119.41	-2.8	-2.86	-309.43	-545.66	-348.51	285.71	32.64	266.36	136.4	591.2
	-83.31	-59.69	-17.8	-19.7	-18.48	-14.41	13.67	-21.39	64.87	109.65	-3.61	-3.25	-104.26	-452.51	-79.91	-280	9.92	101.87	174.79	148.56
	Table Analyzed	Glycine	Table Analyzed	Alanine	Table Analyzed	Serine	Table Analyzed	Threonine	Table Analyzed	Cysteine	Table Analyzed	Valine	Table Analyzed	Leucine	Table Analyzed	Isoleucine	Table Analyzed	Methionine	Table Analyzed	Proline
	Column B	siYAP/TAZ	Column B	siYAP/TAZ	Column B	siYAP/TAZ	Column B	siYAP/TAZ	Column B	siYAP/TAZ	Column B	siYAP/TAZ	Column B	siYAP/TAZ	Column B	siYAP/TAZ	Column B	siYAP/TAZ	Column B	siYAP/TAZ
	vs.	vs,	vs.	vs,	vs.	vs,	vs.	vs,	vs.	vs,	vs.	vs,	vs.	vs,	vs.	vs,	vs.	vs,	vs.	vs,
	Column A	siCtrl	Column A	siCtrl	Column A	siCtrl	Column A	siCtrl	Column A	siCtrl	Column A	siCtrl	Column A	siCtrl	Column A	siCtrl	Column A	siCtrl	Column A	siCtrl
	Unpaired t test		Unpaired t test		Unpaired t test		Unpaired t test		Unpaired t test		Unpaired t test		Unpaired t test		Unpaired t test		Unpaired t test		Unpaired t test
	P value	0.7221	P value	0.0376	P value	0.3031	P value	0.0554	P value	0.6066	P value	0.7737	P value	0.0219	P value	0.0089	P value	0.3096	P value	0.0022
	P value summary	ns	P value summary	*	P value summary	ns	P value summary	ns	P value summary	ns	P value summary	ns	P value summary	*	P value summary	**	P value summary	ns	P value summary	**
	Significantly different (P < 0.05)?	No	Significantly different (P < 0.05)?	Yes	Significantly different (P < 0.05)?	No	Significantly different (P < 0.05)?	No	Significantly different (P < 0.05)?	No	Significantly different (P < 0.05)?	No	Significantly different (P < 0.05)?	Yes	Significantly different (P < 0.05)?	Yes	Significantly different (P < 0.05)?	No	Significantly different (P < 0.05)?	Yes
	One- or two-tailed P value?	Two-tailed	One- or two-tailed P value?	Two-tailed	One- or two-tailed P value?	Two-tailed	One- or two-tailed P value?	Two-tailed	One- or two-tailed P value?	Two-tailed	One- or two-tailed P value?	Two-tailed	One- or two-tailed P value?	Two-tailed	One- or two-tailed P value?	Two-tailed	One- or two-tailed P value?	Two-tailed	One- or two-tailed P value?	Two-tailed
	t, df	t=0,3817, df=4	t, df	t=3,060, df=4	t, df	t=1,181, df=4	t, df	t=2,678, df=4	t, df	t=0,5581, df=4	t, df	t=0,3077, df=4	t, df	t=3,644, df=4	t, df	t=4,767, df=4	t, df	t=1,163, df=4	t, df	t=6,961, df=4
	How big is the difference?		How big is the difference?		How big is the difference?		How big is the difference?		How big is the difference?		How big is the difference?		How big is the difference?		How big is the difference?		How big is the difference?		How big is the difference?
	Mean of column A	0.46	Mean of column A	43.61	Mean of column A	-18.55	Mean of column A	-21.73	Mean of column A	-7.84	Mean of column A	-226	Mean of column A	-1158	Mean of column A	15.26	Mean of column A	-89.97	Mean of column A	162.1
	Mean of column B	0.5867	Mean of column B	107	Mean of column B	-13.29	Mean of column B	11.47	Mean of column B	-9.263	Mean of column B	-196.7	Mean of column B	-2192	Mean of column B	396.9	Mean of column B	-67.65	Mean of column B	364.7
	Difference between means (B - A) ± SEM	0,1267 ± 0,3319	Difference between means (B - A) ± SEM	63,43 ± 20,73	Difference between means (B - A) ± SEM	5,253 ± 4,449	Difference between means (B - A) ± SEM	33,21 ± 12,40	Difference between means (B - A) ± SEM	-1,423 ± 2,550	Difference between means (B - A) ± SEM	29,30 ± 95,23	Difference between means (B - A) ± SEM	-1034 ± 283,8	Difference between means (B - A) ± SEM	381,6 ± 80,05	Difference between means (B - A) ± SEM	22,32 ± 19,19	Difference between means (B - A) ± SEM	202,6 ± 29,10
	95% confidence interval	-0,7948 to 1,048	95% confidence interval	5,886 to 121,0	95% confidence interval	-7,100 to 17,61	95% confidence interval	-1,224 to 67,64	95% confidence interval	-8,505 to 5,658	95% confidence interval	-235,1 to 293,7	95% confidence interval	-1822 to -246,3	95% confidence interval	159,3 to 603,8	95% confidence interval	-30,97 to 75,60	95% confidence interval	121,8 to 283,4
	R squared (eta squared)	0.03514	R squared (eta squared)	0.7007	R squared (eta squared)	0.2584	R squared (eta squared)	0.6419	R squared (eta squared)	0.07224	R squared (eta squared)	0.02312	R squared (eta squared)	0.7685	R squared (eta squared)	0.8503	R squared (eta squared)	0.2526	R squared (eta squared)	0.9237
	F test to compare variances		F test to compare variances		F test to compare variances		F test to compare variances		F test to compare variances		F test to compare variances		F test to compare variances		F test to compare variances		F test to compare variances		F test to compare variances
	F, DFn, Dfd	1,255, 2, 2	F, DFn, Dfd	772,0, 2, 2	F, DFn, Dfd	1,571, 2, 2	F, DFn, Dfd	1,689, 2, 2	F, DFn, Dfd	5,466, 2, 2	F, DFn, Dfd	1,646, 2, 2	F, DFn, Dfd	2,650, 2, 2	F, DFn, Dfd	2,261, 2, 2	F, DFn, Dfd	1,558, 2, 2	F, DFn, Dfd	3,387, 2, 2
	P value	0.8869	P value	0.0026	P value	0.7779	P value	0.7437	P value	0.3093	P value	0.7559	P value	0.548	P value	0.6133	P value	0.7818	P value	0.4559
	P value summary	ns	P value summary	**	P value summary	ns	P value summary	ns	P value summary	ns	P value summary	ns	P value summary	ns	P value summary	ns	P value summary	ns	P value summary	ns
	Significantly different (P < 0.05)?	No	Significantly different (P < 0.05)?	Yes	Significantly different (P < 0.05)?	No	Significantly different (P < 0.05)?	No	Significantly different (P < 0.05)?	No	Significantly different (P < 0.05)?	No	Significantly different (P < 0.05)?	No	Significantly different (P < 0.05)?	No	Significantly different (P < 0.05)?	No	Significantly different (P < 0.05)?	No
	Data analyzed		Data analyzed		Data analyzed		Data analyzed		Data analyzed		Data analyzed		Data analyzed		Data analyzed		Data analyzed		Data analyzed
	Sample size, column A	3	Sample size, column A	3	Sample size, column A	3	Sample size, column A	3	Sample size, column A	3	Sample size, column A	3	Sample size, column A	3	Sample size, column A	3	Sample size, column A	3	Sample size, column A	3
	Sample size, column B	3	Sample size, column B	3	Sample size, column B	3	Sample size, column B	3	Sample size, column B	3	Sample size, column B	3	Sample size, column B	3	Sample size, column B	3	Sample size, column B	3	Sample size, column B	3
	Table Analyzed	Phenylalanine	Table Analyzed	Tyrosine	Table Analyzed	Tryptophan	Table Analyzed	Aspartate	Table Analyzed	Glutamate	Table Analyzed	Asparagine	Table Analyzed	Glutamine	Table Analyzed	Histidine	Table Analyzed	Lysine	Table Analyzed	Arginine
	Column B	siYAP/TAZ	Column B	siYAP/TAZ	Column B	siYAP/TAZ	Column B	siYAP/TAZ	Column B	siYAP/TAZ	Column B	siYAP/TAZ	Column B	siYAP/TAZ	Column B	siYAP/TAZ	Column B	siYAP/TAZ	Column B	siYAP/TAZ
	vs.	vs,	vs.	vs,	vs.	vs,	vs.	vs,	vs.	vs,	vs.	vs,	vs.	vs,	vs.	vs,	vs.	vs,	vs.	vs,
	Column A	siCtrl	Column A	siCtrl	Column A	siCtrl	Column A	siCtrl	Column A	siCtrl	Column A	siCtrl	Column A	siCtrl	Column A	siCtrl	Column A	siCtrl	Column A	siCtrl
	Unpaired t test		Unpaired t test		Unpaired t test		Unpaired t test		Unpaired t test		Unpaired t test		Unpaired t test		Unpaired t test		Unpaired t test		Unpaired t test
	P value	0.0936	P value	0.1946	P value	0.0353	P value	0.0942	P value	0.0244	P value	0.2282	P value	0.9529	P value	0.4624	P value	0.2232	P value	0.3166
	P value summary	ns	P value summary	ns	P value summary	*	P value summary	ns	P value summary	*	P value summary	ns	P value summary	ns	P value summary	ns	P value summary	ns	P value summary	ns
	Significantly different (P < 0.05)?	No	Significantly different (P < 0.05)?	No	Significantly different (P < 0.05)?	Yes	Significantly different (P < 0.05)?	No	Significantly different (P < 0.05)?	Yes	Significantly different (P < 0.05)?	No	Significantly different (P < 0.05)?	No	Significantly different (P < 0.05)?	No	Significantly different (P < 0.05)?	No	Significantly different (P < 0.05)?	No
	One- or two-tailed P value?	Two-tailed	One- or two-tailed P value?	Two-tailed	One- or two-tailed P value?	Two-tailed	One- or two-tailed P value?	Two-tailed	One- or two-tailed P value?	Two-tailed	One- or two-tailed P value?	Two-tailed	One- or two-tailed P value?	Two-tailed	One- or two-tailed P value?	Two-tailed	One- or two-tailed P value?	Two-tailed	One- or two-tailed P value?	Two-tailed
	t, df	t=2,191, df=4	t, df	t=1,556, df=4	t, df	t=3,126, df=4	t, df	t=2,186, df=4	t, df	t=3,521, df=4	t, df	t=1,422, df=4	t, df	t=0,06279, df=4	t, df	t=0,8119, df=4	t, df	t=1,440, df=4	t, df	t=1,144, df=4
	How big is the difference?		How big is the difference?		How big is the difference?		How big is the difference?		How big is the difference?		How big is the difference?		How big is the difference?		How big is the difference?		How big is the difference?		How big is the difference?
	Mean of column A	-148.1	Mean of column A	-30.95	Mean of column A	-20.89	Mean of column A	3.01	Mean of column A	72.99	Mean of column A	-3.933	Mean of column A	-475.4	Mean of column A	-301.1	Mean of column A	3.907	Mean of column A	121
	Mean of column B	10.87	Mean of column B	-14.54	Mean of column B	-9.423	Mean of column B	-20.77	Mean of column B	128.5	Mean of column B	-2.753	Mean of column B	-457.9	Mean of column B	-113	Mean of column B	120.9	Mean of column B	295.2
	Difference between means (B - A) ± SEM	159,0 ± 72,59	Difference between means (B - A) ± SEM	16,41 ± 10,55	Difference between means (B - A) ± SEM	11,47 ± 3,668	Difference between means (B - A) ± SEM	-23,78 ± 10,88	Difference between means (B - A) ± SEM	55,51 ± 15,76	Difference between means (B - A) ± SEM	1,180 ± 0,8300	Difference between means (B - A) ± SEM	17,54 ± 279,4	Difference between means (B - A) ± SEM	188,1 ± 231,6	Difference between means (B - A) ± SEM	117,0 ± 81,22	Difference between means (B - A) ± SEM	174,3 ± 152,4
	95% confidence interval	-42,53 to 360,6	95% confidence interval	-12,87 to 45,69	95% confidence interval	1,283 to 21,65	95% confidence interval	-53,98 to 6,427	95% confidence interval	11,74 to 99,27	95% confidence interval	-1,124 to 3,484	95% confidence interval	-758,2 to 793,3	95% confidence interval	-455,1 to 831,2	95% confidence interval	-108,5 to 342,5	95% confidence interval	-248,8 to 597,3
	R squared (eta squared)	0.5454	R squared (eta squared)	0.3771	R squared (eta squared)	0.7096	R squared (eta squared)	0.5443	R squared (eta squared)	0.7561	R squared (eta squared)	0.3357	R squared (eta squared)	0.0009847	R squared (eta squared)	0.1415	R squared (eta squared)	0.3416	R squared (eta squared)	0.2464
	F test to compare variances		F test to compare variances		F test to compare variances		F test to compare variances		F test to compare variances		F test to compare variances		F test to compare variances		F test to compare variances		F test to compare variances		F test to compare variances
	F, DFn, Dfd	3,984, 2, 2	F, DFn, Dfd	1,359, 2, 2	F, DFn, Dfd	1,316, 2, 2	F, DFn, Dfd	2,256, 2, 2	F, DFn, Dfd	4,478, 2, 2	F, DFn, Dfd	5,644, 2, 2	F, DFn, Dfd	31,24, 2, 2	F, DFn, Dfd	2,958, 2, 2	F, DFn, Dfd	18,13, 2, 2	F, DFn, Dfd	16,57, 2, 2
	P value	0.4013	P value	0.8476	P value	0.8635	P value	0.6143	P value	0.3651	P value	0.301	P value	0.062	P value	0.5053	P value	0.1046	P value	0.1138
	P value summary	ns	P value summary	ns	P value summary	ns	P value summary	ns	P value summary	ns	P value summary	ns	P value summary	ns	P value summary	ns	P value summary	ns	P value summary	ns
	Significantly different (P < 0.05)?	No	Significantly different (P < 0.05)?	No	Significantly different (P < 0.05)?	No	Significantly different (P < 0.05)?	No	Significantly different (P < 0.05)?	No	Significantly different (P < 0.05)?	No	Significantly different (P < 0.05)?	No	Significantly different (P < 0.05)?	No	Significantly different (P < 0.05)?	No	Significantly different (P < 0.05)?	No
	Data analyzed		Data analyzed		Data analyzed		Data analyzed		Data analyzed		Data analyzed		Data analyzed		Data analyzed		Data analyzed		Data analyzed
	Sample size, column A	3	Sample size, column A	3	Sample size, column A	3	Sample size, column A	3	Sample size, column A	3	Sample size, column A	3	Sample size, column A	3	Sample size, column A	3	Sample size, column A	3	Sample size, column A	3
	Sample size, column B	3	Sample size, column B	3	Sample size, column B	3	Sample size, column B	3	Sample size, column B	3	Sample size, column B	3	Sample size, column B	3	Sample size, column B	3	Sample size, column B	3	Sample size, column B	3
