# Supplementary material for: A YAP/TAZ-TEAD signalling module links endothelial nutrient acquisition to angiogenic growth
Source: Nat Metab. 2022 Jun 20;4(6):672–82. doi: 10.1038/s42255-022-00584-y (PMC9236904; doi:10.1038/s42255-022-00584-y)
Supplement: Source Data Extended Data Fig. 9 — Statistical source data. [file 42255_2022_584_MOESM30_ESM.xlsx]

## Sheet: Extended Data Fig.9c
Extended Data Fig.9c
		Slc7a5
		AdNull	AdCre
		1.01179	1.66814
		0.829949	1.92242
		1.19086	2.22561
		0.928939	1.38858
		0.993237	1.46035
		1.08383	1.42442
		Table Analyzed	Slc7a5
		Column B	AdCre
		vs.	vs,
		Column A	AdNull
		Unpaired t test
		P value	0.0009
		P value summary	***
		Significantly different (P < 0.05)?	Yes
		One- or two-tailed P value?	Two-tailed
		t, df	t=4,650, df=10
		How big is the difference?
		Mean of column A	1.006
		Mean of column B	1.682
		Difference between means (B - A) ± SEM	0,6752 ± 0,1452
		95% confidence interval	0,3516 to 0,9987
		R squared (eta squared)	0.6838
		F test to compare variances
		F, DFn, Dfd	7,176, 5, 5
		P value	0.0496
		P value summary	*
		Significantly different (P < 0.05)?	Yes
		Data analyzed
		Sample size, column A	6
		Sample size, column B	6

## Sheet: Extended Data Fig.9d
Extended Data Fig.9d
		Slc7a5
		AdNull	AdCre
		1.13058	0.483772
		0.884498	0.404629
		1.16952	0.766774
		1	0.319827
		0.855051	0.56867
		Table Analyzed	Slc7a5
		Column B	AdCre
		vs.	vs,
		Column A	AdNull
		Unpaired t test
		P value	0.001
		P value summary	**
		Significantly different (P < 0.05)?	Yes
		One- or two-tailed P value?	Two-tailed
		t, df	t=5,028, df=8
		How big is the difference?
		Mean of column A	1.008
		Mean of column B	0.5087
		Difference between means (B - A) ± SEM	-0,4992 ± 0,09928
		95% confidence interval	-0,7281 to -0,2702
		R squared (eta squared)	0.7596
		F test to compare variances
		F, DFn, Dfd	1,470, 4, 4
		P value	0.7181
		P value summary	ns
		Significantly different (P < 0.05)?	No
		Data analyzed
		Sample size, column A	5
		Sample size, column B	5

## Sheet: Extended Data Fig.9e
Extended Data Fig.9e
		Cell Proliferation
		gCtrl	gSLC7A5
		0.95	0.43
		0.85	0.64
		1.21	0.48
		0.92	0.57
		1.05	0.52
		1.03	0.52
		1.07	0.07
		0.95	0.08
		Table Analyzed	Cell proliferation
		Column B	gSLC7A5
		vs.	vs,
		Column A	gCtrl
		Unpaired t test
		P value	<0,0001
		P value summary	****
		Significantly different (P < 0.05)?	Yes
		One- or two-tailed P value?	Two-tailed
		t, df	t=6,824, df=14
		How big is the difference?
		Mean of column A	1.004
		Mean of column B	0.4138
		Difference between means (B - A) ± SEM	-0,5900 ± 0,08646
		95% confidence interval	-0,7754 to -0,4046
		R squared (eta squared)	0.7689
		F test to compare variances
		F, DFn, Dfd	3,857, 7, 7
		P value	0.0957
		P value summary	ns
		Significantly different (P < 0.05)?	No
		Data analyzed
		Sample size, column A	8
		Sample size, column B	8

## Sheet: Extended Data Fig.9G
Extended Data Fig.9f
		EC area (%)			EC number / field			EC proliferation
		Ctrl	Slc7a5 iECKO		Ctrl	Slc7a5 iECKO		Ctrl	Slc7a5 iECKO
		52.52	34.21		80.67	56.38		43.56	15.77
		47.65	34.29		74	57.14		33.22	19.55
		50.73	34		79	58.57		38.17	16.06
		45.87	31.22		68.71	56.5		30.59	17.26
		42.59	36.33		75.14	67.5		27.2	17.78
		43.92	30.98		73	48.75		39.55	25.13
		41.19	27.95		77	51		34.09	23.04
		44.21	33.13		75	56.5		42.67	15.49
			38.94		90.75	66.75		37.19	24.72
			35.88			66.75			14.23
						59			24.15
		Table Analyzed	EC area		Table Analyzed	EC number per field		Table Analyzed	EC proliferation
		Column B	Slc7a5 iECKO		Column B	Slc7a5 iECKO		Column B	Slc7a5 iECKO
		vs.	vs,		vs.	vs,		vs.	vs,
		Column A	Ctrl		Column A	Ctrl		Column A	Ctrl
		Unpaired t test			Unpaired t test			Unpaired t test
		P value	<0,0001		P value	<0,0001		P value	<0,0001
		P value summary	****		P value summary	****		P value summary	****
		Significantly different (P < 0.05)?	Yes		Significantly different (P < 0.05)?	Yes		Significantly different (P < 0.05)?	Yes
		One- or two-tailed P value?	Two-tailed		One- or two-tailed P value?	Two-tailed		One- or two-tailed P value?	Two-tailed
		t, df	t=7,452, df=16		t, df	t=6,612, df=18		t, df	t=7,879, df=18
		How big is the difference?			How big is the difference?			How big is the difference?
		Mean of column A	46.09		Mean of column A	77.03		Mean of column A	36.25
		Mean of column B	33.69		Mean of column B	58.62		Mean of column B	19.38
		Difference between means (B - A) ± SEM	-12,39 ± 1,663		Difference between means (B - A) ± SEM	-18,41 ± 2,784		Difference between means (B - A) ± SEM	-16,87 ± 2,141
		95% confidence interval	-15,92 to -8,867		95% confidence interval	-24,26 to -12,56		95% confidence interval	-21,37 to -12,37
		R squared (eta squared)	0.7763		R squared (eta squared)	0.7084		R squared (eta squared)	0.7752
		F test to compare variances			F test to compare variances			F test to compare variances
		F, DFn, Dfd	1,628, 7, 9		F, DFn, Dfd	1,005, 8, 10		F, DFn, Dfd	1,744, 8, 10
		P value	0.4862		P value	0.9746		P value	0.4039
		P value summary	ns		P value summary	ns		P value summary	ns
		Significantly different (P < 0.05)?	No		Significantly different (P < 0.05)?	No		Significantly different (P < 0.05)?	No
		Data analyzed			Data analyzed			Data analyzed
		Sample size, column A	8		Sample size, column A	9		Sample size, column A	9
		Sample size, column B	10		Sample size, column B	11		Sample size, column B	11
