# Supplementary material for: A YAP/TAZ-TEAD signalling module links endothelial nutrient acquisition to angiogenic growth
Source: Nat Metab. 2022 Jun 20;4(6):672–82. doi: 10.1038/s42255-022-00584-y (PMC9236904; doi:10.1038/s42255-022-00584-y)
Supplement: Source Data Extended Data Fig. 10 — Statistical source data. [file 42255_2022_584_MOESM32_ESM.xlsx]

## Sheet: Extended Data Fig.10a
Extended Data Fig.10a
		MTOR
		gCtl	gRagA/B
		1.07265	1.06733
		1.04999	0.854468
		0.952386	0.874029
		Table Analyzed	MTOR
		Column B	gRAGA/B
		vs.	vs,
		Column A	gCtrl
		Unpaired t test
		P value	0.295
		P value summary	ns
		Significantly different (P < 0.05)?	No
		One- or two-tailed P value?	Two-tailed
		t, df	t=1,204, df=4
		How big is the difference?
		Mean of column A	1.025
		Mean of column B	0.9319
		Difference between means (B - A) ± SEM	-0,09307 ± 0,07730
		95% confidence interval	-0,3077 to 0,1216
		R squared (eta squared)	0.266
		F test to compare variances
		F, DFn, Dfd	3,389, 2, 2
		P value	0.4556
		P value summary	ns
		Significantly different (P < 0.05)?	No
		Data analyzed
		Sample size, column A	3
		Sample size, column B	3

## Sheet: Extended Data Fig.10c
Extended Data Fig.10c
		MTOR
		gCtl	gRagA/B
		1.0528	1.12176
		0.947196	1.12296
		1.02797	0.999704
		0.97203	0.797132
		Table Analyzed	mTOR
		Column A	gCtl
		vs.	vs,
		Column B	gRagA/B
		Unpaired t test
		P value	0.9016
		P value summary	ns
		Significantly different (P < 0.05)?	No
		One- or two-tailed P value?	Two-tailed
		t, df	t=0,1290, df=6
		How big is the difference?
		Mean of column A	1
		Mean of column B	1.01
		Difference between means (A - B) ± SEM	-0,01039 ± 0,08052
		95% confidence interval	-0,2074 to 0,1866
		R squared (eta squared)	0.002766
		F test to compare variances
		F, DFn, Dfd	9,896, 3, 3
		P value	0.0918
		P value summary	ns
		Significantly different (P < 0.05)?	No
		Data analyzed
		Sample size, column A	4
		Sample size, column B	4

## Sheet: Extended Data Fig.10d
Extended Data Fig.10d
		mTOR/LAMP2 colocalization
		gCtrl	gRagA/B
		0.896	0.566
		0.715	0.484
		0.825	0.348
		0.757	0.487
		0.726	0.224
		Table Analyzed	mTOR/LAMP2 colocalization
		Column B	gRagA/B
		vs.	vs,
		Column A	gCtrl
		Unpaired t test
		P value	0.0008
		P value summary	***
		Significantly different (P < 0.05)?	Yes
		One- or two-tailed P value?	Two-tailed
		t, df	t=5,210, df=8
		How big is the difference?
		Mean of column A	0.7838
		Mean of column B	0.4218
		Difference between means (B - A) ± SEM	-0,3620 ± 0,06949
		95% confidence interval	-0,5222 to -0,2018
		R squared (eta squared)	0.7723
		F test to compare variances
		F, DFn, Dfd	3,184, 4, 4
		P value	0.2881
		P value summary	ns
		Significantly different (P < 0.05)?	No
		Data analyzed
		Sample size, column A	5
		Sample size, column B	5

## Sheet: Extended Data Fig.10h
Extended Data Fig.10h
		DNA synthesis
		gCtrl					gRagA/B
	iCtrl	0.65	1.15	1.25	1.67	0.63	0.4	0.29	0.48	0.67	0.68
	iYAP S127A	2.36	1.84	1.27	2.85	1.43	0.12	0.2	0.06	0.32	0.14
	iTAZ S89A	2.8	4.2	3.39	2.59	1.72	0.59	0.64	0.2	0.17	0.06
	Table Analyzed	DNA synthesis - iCtrl		Table Analyzed	DNA synthesis - iYAP S127A		Table Analyzed	DNA synthesis - iTAZ S89A
	Column B	gRagAB		Column B	gRagAB		Column B	gRagAB
	vs.	vs,		vs.	vs,		vs.	vs,
	Column A	gCtrl		Column A	gCtrl		Column A	gCtrl
	Unpaired t test			Unpaired t test			Unpaired t test
	P value	0.0274		P value	0.0003		P value	0.0003
	P value summary	*		P value summary	***		P value summary	***
	Significantly different (P < 0.05)?	Yes		Significantly different (P < 0.05)?	Yes		Significantly different (P < 0.05)?	Yes
	One- or two-tailed P value?	Two-tailed		One- or two-tailed P value?	Two-tailed		One- or two-tailed P value?	Two-tailed
	t, df	t=2,691, df=8		t, df	t=6,004, df=8		t, df	t=6,064, df=8
	How big is the difference?			How big is the difference?			How big is the difference?
	Mean of column A	1.07		Mean of column A	1.95		Mean of column A	2.94
	Mean of column B	0.504		Mean of column B	0.168		Mean of column B	0.332
	Difference between means (B - A) ± SEM	-0,5660 ± 0,2103		Difference between means (B - A) ± SEM	-1,782 ± 0,2968		Difference between means (B - A) ± SEM	-2,608 ± 0,4301
	95% confidence interval	-1,051 to -0,08105		95% confidence interval	-2,466 to -1,098		95% confidence interval	-3,600 to -1,616
	R squared (eta squared)	0.4752		R squared (eta squared)	0.8184		R squared (eta squared)	0.8213
	F test to compare variances			F test to compare variances			F test to compare variances
	F, DFn, Dfd	6,644, 4, 4		F, DFn, Dfd	44,32, 4, 4		F, DFn, Dfd	12,26, 4, 4
	P value	0.0937		P value	0.0029		P value	0.0324
	P value summary	ns		P value summary	**		P value summary	*
	Significantly different (P < 0.05)?	No		Significantly different (P < 0.05)?	Yes		Significantly different (P < 0.05)?	Yes
	Data analyzed			Data analyzed			Data analyzed
	Sample size, column A	5		Sample size, column A	5		Sample size, column A	5
	Sample size, column B	5		Sample size, column B	5		Sample size, column B	5

## Sheet: Extended Data Fig.10i
Extended Data Fig.10i
		Protein Synthesis
		gCtrl									gRagA/B
	iCtrl	0.87	1.1	1.03	1.2	0.96	0.84	0.98	0.91	1.1	0.58	0.95	0.89	1.02	0.89	0.88	0.43	0.41	0.42
	iYAP S127A	1.88	2.24	2.56	1.94	1.54	1.89	1.67	1.92	1.77	0.62	0.64	0.69	0.58	0.72	0.72	0.42	0.49	0.52
	iTAZ S89A	1.69	2.41	2.16	1.89	1.76	1.75	1.48	1.42	1.48	0.96	0.89	0.98	0.89	0.82	0.94	0.67	0.71	0.73
	Table Analyzed	Protein synthesis - iCtrl		Table Analyzed	Protein synthesis - iYAP S127A			Table Analyzed	Protein synthesis - iTAZ S89A
	Column B	gRagAB		Column B	gRagAB			Column B	gRagAB
	vs.	vs,		vs.	vs,			vs.	vs,
	Column A	gCtrl		Column A	gCtrl			Column A	gCtrl
	Unpaired t test			Unpaired t test				Unpaired t test
	P value	0.0086		P value	<0,0001			P value	<0,0001
	P value summary	**		P value summary	****			P value summary	****
	Significantly different (P < 0.05)?	Yes		Significantly different (P < 0.05)?	Yes			Significantly different (P < 0.05)?	Yes
	One- or two-tailed P value?	Two-tailed		One- or two-tailed P value?	Two-tailed			One- or two-tailed P value?	Two-tailed
	t, df	t=2,994, df=16		t, df	t=12,41, df=16			t, df	t=8,049, df=16
	How big is the difference?			How big is the difference?				How big is the difference?
	Mean of column A	0.9989		Mean of column A	1.934			Mean of column A	1.782
	Mean of column B	0.7189		Mean of column B	0.6			Mean of column B	0.8433
	Difference between means (B - A) ± SEM	-0,2800 ± 0,09351		Difference between means (B - A) ± SEM	-1,334 ± 0,1075			Difference between means (B - A) ± SEM	-0,9389 ± 0,1166
	95% confidence interval	-0,4782 to -0,08177		95% confidence interval	-1,562 to -1,106			95% confidence interval	-1,186 to -0,6916
	R squared (eta squared)	0.3591		R squared (eta squared)	0.9059			R squared (eta squared)	0.802
	F test to compare variances			F test to compare variances				F test to compare variances
	F, DFn, Dfd	4,547, 8, 8		F, DFn, Dfd	8,231, 8, 8			F, DFn, Dfd	8,138, 8, 8
	P value	0.0465		P value	0.0074			P value	0.0076
	P value summary	*		P value summary	**			P value summary	**
	Significantly different (P < 0.05)?	Yes		Significantly different (P < 0.05)?	Yes			Significantly different (P < 0.05)?	Yes
	Data analyzed			Data analyzed				Data analyzed
	Sample size, column A	9		Sample size, column A	9			Sample size, column A	9
	Sample size, column B	9		Sample size, column B	9			Sample size, column B	9
