# Supplementary material for: A YAP/TAZ-TEAD signalling module links endothelial nutrient acquisition to angiogenic growth
Source: Nat Metab. 2022 Jun 20;4(6):672–82. doi: 10.1038/s42255-022-00584-y (PMC9236904; doi:10.1038/s42255-022-00584-y)
Supplement: Source Data Fig. 1 — Statistical source data. [file 42255_2022_584_MOESM11_ESM.xlsx]

## Sheet: Figure 1a
Figure 1a
		Retinal ECs (P6)
		Yap1	Taz
		1198	7538
		1322	7499
		1315	7611
		1111	7320
		Table Analyzed	Yap/Taz mRNA expression - P6
		Column B	Taz
		vs.	vs,
		Column A	Yap1
		Unpaired t test
		P value	<0,0001
		P value summary	****
		Significantly different (P < 0.05)?	Yes
		One- or two-tailed P value?	Two-tailed
		t, df	t=78,29, df=6
		How big is the difference?
		Mean of column A	1237
		Mean of column B	7492
		Difference between means (B - A) ± SEM	6256 ± 79,90
		95% confidence interval	6060 to 6451
		R squared (eta squared)	0.999
		F test to compare variances
		F, DFn, Dfd	1,495, 3, 3
		P value	0.749
		P value summary	ns
		Significantly different (P < 0.05)?	No
		Data analyzed
		Sample size, column A	4
		Sample size, column B	4

## Sheet:  Figure 1e
Figure 1e
		% ECs per field
		Nuclear										nucleo-cyto										Cytoplasmic
	Front (AF)	54.44	28.82	43.16	31.19	28.05	57.21	54.88	61.44	51.97	59.23	37.1	56.65	52.11	59.66	66.97	41.08	42.38	35.64	44.88	35.59	8.47	14.53	4.74	9.15	4.98	1.71	2.74	2.93	3.15	5.18
	Plexus (RP)	27.8	3.9	1.67	4.06	3.32	1.04	0.42	1.97	0	0.77	43.63	39.04	44.15	49.88	56.46	51.56	34.6	38.42	20	26.82	28.57	57.06	54.18	46.06	40.22	47.4	64.98	59.61	80	72.41
		Table Analyzed	Nuclear_AF vs RP		Table Analyzed	NC_AF vs RP		Table Analyzed	Cyto_AF vs RP
		Column A	AF		Column A	AF		Column A	AF
		vs	vs		vs	vs		vs	vs
		Column B	RP		Column B	RP		Column B	RP
		Unpaired t test			Unpaired t test			Unpaired t test
		P value	< 0,0001		P value	0.1921		P value	< 0,0001
		P value summary	****		P value summary	ns		P value summary	****
		Are means signif. different? (P < 0.05)	Yes		Are means signif. different? (P < 0.05)	No		Are means signif. different? (P < 0.05)	Yes
		One- or two-tailed P value?	Two-tailed		One- or two-tailed P value?	Two-tailed		One- or two-tailed P value?	Two-tailed
		t, df	t=8,643 df=18		t, df	t=1,355 df=18		t, df	t=9,866 df=18
		How big is the difference?			How big is the difference?			How big is the difference?
		Mean ± SEM of column A	47,04 ± 4,162 N=10		Mean ± SEM of column A	47,21 ± 3,490 N=10		Mean ± SEM of column A	5,758 ± 1,239 N=10
		Mean ± SEM of column B	4,495 ± 2,629 N=10		Mean ± SEM of column B	40,46 ± 3,554 N=10		Mean ± SEM of column B	55,05 ± 4,840 N=10
		Difference between means	42,54 ± 4,923		Difference between means	6,750 ± 4,981		Difference between means	-49,29 ± 4,996
		95% confidence interval	32,20 to 52,89		95% confidence interval	-3,715 to 17,21		95% confidence interval	-59,79 to -38,79
		R square	0.8058		R square	0.09258		R square	0.8439
		F test to compare variances			F test to compare variances			F test to compare variances
		F,DFn, Dfd	2,506, 9, 9		F,DFn, Dfd	1,037, 9, 9		F,DFn, Dfd	15,27, 9, 9
		P value	0.1873		P value	0.9575		P value	0.0004
		P value summary	ns		P value summary	ns		P value summary	***
		Are variances significantly different?	No		Are variances significantly different?	No		Are variances significantly different?	Yes

## Sheet: Figure 1i
Figure 1i
		EC Area (%)			EC number / field			EC proliferation (%)
		Ctrl	Taz iEC-GOF		Ctrl	Taz iEC-GOF		Ctrl	Taz iEC-GOF
		31.38	50.67		68	85.88		28.92	34.82
		42.07	45.63		60.14	90.43		32.3	35.5
		47.23	49.32		61.875	82		33.61	35.58
		43.96	48.31		60.25	89.5		33.01	37.24
		49.9	55.94		58.83	61.75		30.88	36.21
		47.27	54		68.2	60.43		31.38	40.74
		39.87	59.35		61	65		25.4
		42.6	50.62		61.86	72.5		23.76
		40.76	51.12		67	75.25		29.07
		41.67	53.34		62	77.14		25.64
		40.71	45.5		64			23.85
		40.6	49.22		72			26.17
		44.56	67.68					30.9
		41.43	58.59
		44.06
		48.49
		Table Analyzed	EC area (%)		Table Analyzed	EC number / field		Table Analyzed	EC proliferation (%)
		Column B	Taz iEC-GOF		Column B	Taz iEC-GOF		Column B	Taz iEC-GOF
		vs.	vs,		vs.	vs,		vs.	vs,
		Column A	Ctrl		Column A	Ctrl		Column A	Ctrl
		Unpaired t test			Unpaired t test			Unpaired t test
		P value	<0,0001		P value	0.002		P value	0.0001
		P value summary	****		P value summary	**		P value summary	***
		Significantly different (P < 0.05)?	Yes		Significantly different (P < 0.05)?	Yes		Significantly different (P < 0.05)?	Yes
		One- or two-tailed P value?	Two-tailed		One- or two-tailed P value?	Two-tailed		One- or two-tailed P value?	Two-tailed
		t, df	t=5,205, df=28		t, df	t=3,557, df=20		t, df	t=5,026, df=17
		How big is the difference?			How big is the difference?			How big is the difference?
		Mean of column A	42.91		Mean of column A	63.76		Mean of column A	28.84
		Mean of column B	52.81		Mean of column B	75.99		Mean of column B	36.68
		Difference between means (B - A) ± SEM	9,896 ± 1,901		Difference between means (B - A) ± SEM	12,23 ± 3,437		Difference between means (B - A) ± SEM	7,844 ± 1,561
		95% confidence interval	6,002 to 13,79		95% confidence interval	5,056 to 19,39		95% confidence interval	4,551 to 11,14
		R squared (eta squared)	0.4918		R squared (eta squared)	0.3875		R squared (eta squared)	0.5977
		F test to compare variances			F test to compare variances			F test to compare variances
		F, DFn, Dfd	1,913, 13, 15		F, DFn, Dfd	7,348, 9, 11		F, DFn, Dfd	2,653, 12, 5
		P value	0.2299		P value	0.0031		P value	0.29
		P value summary	ns		P value summary	**		P value summary	ns
		Significantly different (P < 0.05)?	No		Significantly different (P < 0.05)?	Yes		Significantly different (P < 0.05)?	No
		Data analyzed			Data analyzed			Data analyzed
		Sample size, column A	16		Sample size, column A	12		Sample size, column A	13
		Sample size, column B	14		Sample size, column B	10		Sample size, column B	6
