# Supplementary material for: A YAP/TAZ-TEAD signalling module links endothelial nutrient acquisition to angiogenic growth
Source: Nat Metab. 2022 Jun 20;4(6):672–82. doi: 10.1038/s42255-022-00584-y (PMC9236904; doi:10.1038/s42255-022-00584-y)
Supplement: Source Data Fig. 2 — Statistical source data. [file 42255_2022_584_MOESM13_ESM.xlsx]

## Sheet: Figure 2e
Figure 2e
		Retinal ECs (P6)
		Norm. Counts
		Tead1	Tead2	Tead3	Tead4
		619	2007	4	427
		596	2017	25	423
		689	2092	27	470
		497	1999	30	416

## Sheet: Figure 2f
Figure 2f
		HUVECs
		Norm. Counts
		TEAD1	TEAD2	TEAD3	TEAD4
		1942	1989	45	1252
		2356	1670	38	1114
		2251	1646	34	1134

## Sheet: Figure 2i
Figure 2i
		EC area (%)			EC number/field			EC proliferation (%)
		Ctrl	Tead1/2/4 iECKO		Ctrl	Tead1/2/4 iECKO		Ctrl	Tead1/2/4 iECKO
		39.53	29.63		58.5	45.25		45.64	29.48
		53.93	33.18		70.43	50.88		43.96	27.49
		47.41	26.24		60.67	41.83		58.36	25.73
		41.62	23.14		55.57	40.2		41.13	33.4
		37.99	28.3		66.3	41.9		37.54	26.1
		33.77	26.4		63.7			43.9
		45.8						46.1
		44.5
								Column B	Tead1/2/4 iECKO
		Table Analyzed	EC area (%)		Table Analyzed	EC number/field		vs.	vs,
								Column A	Ctrl
		Column B	Tead1/2/4 iECKO		Column B	Tead1/2/4 iECKO
		vs.	vs,		vs.	vs,		Unpaired t test
		Column A	Ctrl		Column A	Ctrl		P value	0.0003
								P value summary	***
		Unpaired t test			Unpaired t test			Significantly different (P < 0.05)?	Yes
		P value	0.0002		P value	0.0002		One- or two-tailed P value?	Two-tailed
		P value summary	***		P value summary	***		t, df	t=5,307, df=10
		Significantly different (P < 0.05)?	Yes		Significantly different (P < 0.05)?	Yes
		One- or two-tailed P value?	Two-tailed		One- or two-tailed P value?	Two-tailed		How big is the difference?
		t, df	t=5,371, df=12		t, df	t=6,205, df=9		Mean of column A	45.23
								Mean of column B	28.44
		How big is the difference?			How big is the difference?			Difference between means (B - A) ± SEM	-16,79 ± 3,164
		Mean of column A	43.07		Mean of column A	62.53		95% confidence interval	-23,84 to -9,742
		Mean of column B	27.82		Mean of column B	44.01		R squared (eta squared)	0.738
		Difference between means (B - A) ± SEM	-15,25 ± 2,840		Difference between means (B - A) ± SEM	-18,52 ± 2,984
		95% confidence interval	-21,44 to -9,066		95% confidence interval	-25,27 to -11,77		F test to compare variances
		R squared (eta squared)	0.7062		R squared (eta squared)	0.8105		F, DFn, Dfd	4,274, 6, 4
								P value	0.1811
		F test to compare variances			F test to compare variances			P value summary	ns
		F, DFn, Dfd	3,327, 7, 5		F, DFn, Dfd	1,614, 5, 4		Significantly different (P < 0.05)?	No
		P value	0.2044		P value	0.6635
		P value summary	ns		P value summary	ns		Data analyzed
		Significantly different (P < 0.05)?	No		Significantly different (P < 0.05)?	No		Sample size, column A	7
								Sample size, column B	5
		Data analyzed			Data analyzed
		Sample size, column A	8		Sample size, column A	6
		Sample size, column B	6		Sample size, column B	5
