# Supplementary material for: A YAP/TAZ-TEAD signalling module links endothelial nutrient acquisition to angiogenic growth
Source: Nat Metab. 2022 Jun 20;4(6):672–82. doi: 10.1038/s42255-022-00584-y (PMC9236904; doi:10.1038/s42255-022-00584-y)
Supplement: Supplementary file 2 — Proteins interacting with YAPS127A and TAZS89A in HUVECs (n = 3 independent samples). A two-tailed unpaired t-test was used to calculate P values. [file 42255_2022_584_MOESM2_ESM.xlsx]

## Sheet: YAP S127A interactome
Protein name	Gene name	log2 FC_YAP S127A/Ctrl	-log10 p-value_YAP S127A/Ctrl
Angiomotin-like protein 2	AMOTL2	15.4212	6.7638
Collagen alpha-1(XVIII) chain;Endostatin	COL18A1	12.3006	7.32033
Angiomotin-like protein 1	AMOTL1	12.0248	5.86283
Tyrosine-protein phosphatase non-receptor type 14	PTPN14	11.2205	2.57426
MAGUK p55 subfamily member 5	MPP5	9.4814	4.65609
Multiple PDZ domain protein	MPDZ	8.70231	3.76773
Serine/threonine-protein kinase LATS1	LATS1	8.47535	3.80135
Angiomotin	AMOT	8.03069	3.37989
Yorkie homolog	YAP1	7.8759	6.36497
14-3-3 protein eta	YWHAH	7.2009	3.89887
Major vault protein	MVP	6.9895	2.53014
14-3-3 protein zeta/delta	YWHAZ	6.87827	2.79267
Protein WWC2	WWC2	6.84003	4.62811
Transcriptional enhancer factor TEF-3	TEAD4	6.45668	3.10068
Poly [ADP-ribose] polymerase 4	PARP4	6.44653	3.95707
14-3-3 protein theta	YWHAQ	6.16522	4.19975
Protein lin-7 homolog C	LIN7C	6.073	3.66685
14-3-3 protein gamma;14-3-3 protein gamma, N-terminally processed	YWHAG	6.01188	3.0577
Protein tweety homolog 3	TTYH3	5.82658	3.83062
14-3-3 protein beta/alpha;14-3-3 protein beta/alpha, N-terminally processed	YWHAB	5.69729	2.0455
Na(+)/H(+) exchange regulatory cofactor NHE-RF2	SLC9A3R2	5.64522	4.55271
Protein WWC3	WWC3	5.48208	2.01592
WW domain-binding protein 2	WBP2	4.9934	2.38329
14-3-3 protein epsilon	YWHAE	4.90097	5.2488
Merlin	NF2	4.71111	5.06138
Transcriptional enhancer factor TEF-1;Transcriptional enhancer factor TEF-5	TEAD1;TEAD3	4.34725	3.12101
Uveal autoantigen with coiled-coil domains and ankyrin repeats	UACA	4.17422	4.31552
Apoptosis-stimulating of p53 protein 2	TP53BP2	3.96615	4.18411
Rap guanine nucleotide exchange factor 2	RAPGEF2	3.74937	2.19249
Angiomotin-like protein 1	AMOTL2	3.72117	2.88488
Heat shock 70 kDa protein 1A/1B	HSPA1A	3.7052	3.86745
Cysteine-rich motor neuron 1 protein;Processed cysteine-rich motor neuron 1 protein	CRIM1	3.66554	1.92423
Ras association domain-containing protein 8	RASSF8	3.56127	1.93677
NEDD4 family-interacting protein 1	NDFIP1	3.34328	1.87063
Junctional protein associated with coronary artery disease	KIAA1462	3.2094	2.77449
Activator of 90 kDa heat shock protein ATPase homolog 1	AHSA1	3.20392	3.57231
Heat shock protein 105 kDa	HSPH1	2.88284	2.79749
Replication protein A 14 kDa subunit	RPA3	2.87366	1.89025
TRIO and F-actin-binding protein	TRIOBP	2.81638	2.52982
Heat shock cognate 71 kDa protein	HSPA8	2.54005	4.44732
Tight junction protein ZO-1	TJP1	2.48321	1.41623
Fatty acid desaturase 3	FADS3	2.36212	2.20231
Nucleolar protein 16	NOP16	2.29058	2.0656
Ceramide glucosyltransferase	UGCG	2.27522	1.84108
PDZ and LIM domain protein 5	PDLIM5	2.2507	2.68319
Protein-lysine 6-oxidase	LOX	2.17254	3.55571
Sequestosome-1	SQSTM1	2.1617	1.35386
Mesoderm-specific transcript homolog protein	MEST	2.14492	1.30642
Spartin	SPG20	2.00603	1.59907
Multifunctional methyltransferase subunit TRM112-like protein	TRMT112	1.96337	1.37812
Putative ubiquitin-conjugating enzyme E2 N-like;Ubiquitin-conjugating enzyme E2 N	UBE2NL;UBE2N	1.94853	1.38952
SWI/SNF complex subunit SMARCC2	SMARCC2	1.9467	1.47911
Syntenin-1	SDCBP	1.94005	2.32203
SRSF protein kinase 1	SRPK1	1.93505	1.64399
Ras GTPase-activating-like protein IQGAP3	IQGAP3	1.9196	1.98045
Prolactin-inducible protein	PIP	1.87214	2.09757
CD63 antigen	CD63	1.84887	3.12073
Plakophilin-2	PKP2	1.73465	2.26956
78 kDa glucose-regulated protein	HSPA5	1.72572	3.28452
Transmembrane and coiled-coil domain-containing protein 1	TMCO1	1.67828	1.32797
Cell division cycle protein 20 homolog	CDC20	1.602	2.1336
Eukaryotic translation initiation factor 4 gamma 1	EIF4G1	1.58693	2.5357
EGF-containing fibulin-like extracellular matrix protein 1	EFEMP1	1.57483	1.40317
Serine/threonine-protein kinase LATS2	LATS2	1.5549	1.4787
Tropomyosin alpha-1 chain	TPM1	1.55195	1.4025
Myc target protein 1	MYCT1	1.3434	1.8284
NEDD4-like E3 ubiquitin-protein ligase WWP2	WWP2	1.33779	1.73004
Connective tissue growth factor	CTGF	1.31594	3.17402
Palmitoyltransferase ZDHHC13	ZDHHC13	1.30408	2.16326
Actin filament-associated protein 1	AFAP1	1.26238	1.32817
TNF receptor-associated factor 4	TRAF4	1.25916	3.35559
26S protease regulatory subunit 6B	PSMC4	1.21751	1.30769
SWI/SNF complex subunit SMARCC1	SMARCC1	1.21	2.78856
F-box/WD repeat-containing protein 11	FBXW11	1.18938	2.91873
Tight junction protein ZO-2	TJP2	1.18294	3.63437
Phospholipid scramblase 4	PLSCR4	1.13765	1.46051
26S protease regulatory subunit 6A	PSMC3	1.04472	2.44267
Proteasome subunit alpha type-1	PSMA1	1.01721	2.22419
DNA replication licensing factor MCM4	MCM4	1.00818	1.41734

## Sheet: TAZ S89A interactome
Protein name	Gene name	log2 FC_TAZ S89A/Ctrl	-log10 p-value_TAZ S89A/Ctrl
WW domain-containing transcription regulator protein 1	WWTR1	12.9978	2.93547
Angiomotin-like protein 2	AMOTL2	12.9626	5.92181
MAGUK p55 subfamily member 5	MPP5	10.5494	4.61582
Multiple PDZ domain protein	MPDZ	9.98364	4.1124
Angiomotin-like protein 1	AMOTL1	9.55815	3.45424
Angiomotin	AMOT	8.09457	3.36366
Protein lin-7 homolog C	LIN7C	6.93036	3.80647
Transcriptional enhancer factor TEF-3	TEAD4	5.92592	2.9732
F-box/WD repeat-containing protein 1A	BTRC;DKFZp781N011	4.21937	3.1591
Merlin	NF2	4.20241	4.22227
Transcriptional enhancer factor TEF-4	TEAD2	4.18925	5.30071
Na(+)/H(+) exchange regulatory cofactor NHE-RF2	SLC9A3R2	4.16643	3.09003
14-3-3 protein eta	YWHAH	3.83339	3.36246
Cysteine-rich motor neuron 1 protein;Processed cysteine-rich motor neuron 1 protein	CRIM1	3.6385	2.01173
S-phase kinase-associated protein 1	SKP1	3.56437	2.14101
14-3-3 protein zeta/delta	YWHAZ	3.53318	1.75491
Transcriptional enhancer factor TEF-1;Transcriptional enhancer factor TEF-5	TEAD1;TEAD3	3.48681	2.38221
F-box/WD repeat-containing protein 11	FBXW11	3.45215	4.47921
WW domain-binding protein 2	WBP2	3.38478	1.76394
Putative ubiquitin-conjugating enzyme E2 N-like;Ubiquitin-conjugating enzyme E2 N	UBE2NL;UBE2N	3.32003	2.14614
Profilin-1	PFN1	3.12853	1.47351
Cullin-1	CUL1	3.08189	2.87823
Replication protein A 14 kDa subunit	RPA3	3.08029	2.26727
Myosin light chain 1/3, skeletal muscle isoform	MYL1	3.02554	1.41108
Ceramide glucosyltransferase	UGCG	2.93331	2.58119
14-3-3 protein gamma;14-3-3 protein gamma, N-terminally processed	YWHAG	2.82383	1.84718
Apoptosis-stimulating of p53 protein 2	TP53BP2	2.81612	2.59801
Ras GTPase-activating-like protein IQGAP3	IQGAP3	2.72821	2.13589
Polynucleotide 5-hydroxyl-kinase NOL9	NOL9	2.69559	1.35606
Elongation factor 1-beta	EEF1B2	2.66527	1.38922
Protein MGARP	MGARP	2.57264	1.46911
Protein diaphanous homolog 3	DIAPH3	2.55075	2.66085
14-3-3 protein epsilon	YWHAE	2.50678	2.95589
Transcription initiation factor TFIID subunit 4	TAF4	2.42625	1.62152
Phosphatidylserine synthase 1	PTDSS1	2.39881	2.32513
Protein mago nashi homolog;Protein mago nashi homolog 2	MAGOHB;MAGOH	2.26316	2.19355
14-3-3 protein theta	YWHAQ	2.19429	2.07063
Plakophilin-2	PKP2	2.18695	3.30477
Retinoic acid-induced protein 3	GPRC5A	2.14496	3.13597
Claudin-11;Claudin	CLDN11	2.06645	1.9112
PDZ and LIM domain protein 5	PDLIM5	2.04197	2.62819
Transmembrane and coiled-coil domain-containing protein 1	TMCO1	2.02648	1.88303
EGF-containing fibulin-like extracellular matrix protein 1	EFEMP1	2.00237	1.60141
Serine/threonine-protein kinase LATS1	LATS1	1.88	1.45009
Myosin light polypeptide 6	MYL6;PDE6H	1.83904	2.03676
Actin filament-associated protein 1	AFAP1	1.81631	2.06988
Multifunctional methyltransferase subunit TRM112-like protein	TRMT112	1.77559	1.34997
Retinoblastoma-binding protein 5	RBBP5	1.76292	1.97724
Uncharacterized protein NCBP2-AS2	NCBP2-AS2	1.75783	1.82601
Myosin regulatory light chain 12A	MYL12A	1.71674	1.36751
S-adenosylmethionine synthase isoform type-2	MAT2A	1.66986	4.23614
RING finger protein 219	RNF219	1.66795	3.2965
Cell division cycle protein 20 homolog	CDC20	1.65883	2.37853
Myosin-9	MYH9	1.63886	1.37371
RNA-binding protein 8A	RBM8A	1.61545	1.51008
Heat shock protein 105 kDa	HSPH1	1.58927	2.38816
Connective tissue growth factor	CTGF	1.5755	5.83551
Glioma tumor suppressor candidate region gene 2 protein	GLTSCR2	1.48611	1.5666
Serine/threonine-protein kinase PLK1	PLK1	1.46973	1.69465
Tropomyosin alpha-1 chain	TPM1	1.45946	1.41032
Phospholipid scramblase 4	PLSCR4	1.45323	2.25603
Kinesin-like protein KIF2C	KIF2C	1.44336	3.11462
Protein-lysine 6-oxidase	LOX	1.43145	2.11055
Replication initiator 1	REPIN1	1.41361	1.532
Ribonuclease P protein subunit p20	POP7	1.40237	1.80016
Heat shock cognate 71 kDa protein	HSPA8	1.39427	4.28483
SRA stem-loop-interacting RNA-binding protein, mitochondrial	SLIRP	1.38486	1.80731
Biogenesis of lysosome-related organelles complex 1 subunit 2	BLOC1S2	1.36899	1.55428
Probable ATP-dependent RNA helicase DDX47	DDX47	1.36173	3.26198
Survival motor neuron protein	SMN1	1.35414	1.36563
Trinucleotide repeat-containing gene 6B protein	TNRC6B	1.32315	1.63147
Tight junction protein ZO-2	TJP2	1.28997	3.4983
Small nuclear ribonucleoprotein Sm D2	SNRPD2	1.20455	1.93166
V-type proton ATPase 116 kDa subunit a isoform 2	ATP6V0A2	1.17549	1.37036
Protein S100-A10	S100A10	1.17198	2.22228
Kinesin-like protein KIF11	KIF11	1.09174	1.95309
40S ribosomal protein S27	RPS27	1.07714	1.36273
Tropomyosin alpha-3 chain	TPM3	1.06242	1.75851
Probable ATP-dependent RNA helicase DHX37	DHX37	1.05058	1.95397
Lysyl oxidase homolog 2	LOXL2	1.01233	3.20177
Keratin, type I cytoskeletal 18	KRT18	1.00809	1.32658
