# Supplementary material for: A YAP/TAZ-TEAD signalling module links endothelial nutrient acquisition to angiogenic growth
Source: Nat Metab. 2022 Jun 20;4(6):672–82. doi: 10.1038/s42255-022-00584-y (PMC9236904; doi:10.1038/s42255-022-00584-y)
Supplement: Supplementary file 3 — Differentially expressed genes in HUVECs expressing YAPS127A and TAZS89A (n = 3 independent samples). The Wald test was used to calculate P values. [file 42255_2022_584_MOESM3_ESM.xlsx]

## Sheet: YAP S127A_upregulated
Ensembl gene ID	Ensembl gene	log2(YAP S127A/Ctrl)	-log10(P value)
ENSG00000137693	YAP1	6.35185	0
ENSG00000128510	CPA4	6.29467	71.7575
ENSG00000160255	ITGB2	5.86696	33.8147
ENSG00000138356	AOX1	5.38026	127.629
ENSG00000176532	PRR15	5.35904	59.1739
ENSG00000189068	VSTM1	4.84043	8.61574
ENSG00000152779	SLC16A12	4.81725	17.8519
ENSG00000188783	PRELP	4.67366	12.5342
ENSG00000158246	TENT5B	4.55473	45.9392
ENSG00000105929	ATP6V0A4	4.39152	23.6136
ENSG00000092969	TGFB2	4.29253	276.522
ENSG00000185761	ADAMTSL5	4.11123	6.58861
ENSG00000188112	C6orf132	4.07335	35.1581
ENSG00000140284	SLC27A2	4.05264	8.15498
ENSG00000075223	SEMA3C	3.99746	10.2205
ENSG00000132561	MATN2	3.98066	0
ENSG00000043591	ADRB1	3.89182	10.8815
ENSG00000154319	FAM167A	3.80268	13.4866
ENSG00000057294	PKP2	3.79555	85.2252
ENSG00000109193	SULT1E1	3.78584	21.5917
ENSG00000189410	SH2D5	3.72653	29.9692
ENSG00000176697	BDNF	3.67946	150.696
ENSG00000198121	LPAR1	3.63073	4.71241
ENSG00000168952	STXBP6	3.62863	7.23395
ENSG00000023608	SNAPC1	3.59442	0
ENSG00000070159	PTPN3	3.56806	5.68244
ENSG00000126562	WNK4	3.55795	34.1932
ENSG00000123977	DAW1	3.55059	167.393
ENSG00000117152	RGS4	3.43329	0
ENSG00000171385	KCND3	3.41169	5.59344
ENSG00000120337	TNFSF18	3.40149	0
ENSG00000134363	FST	3.397	23.9774
ENSG00000004776	HSPB6	3.39382	52.785
ENSG00000113578	FGF1	3.38999	7.875
ENSG00000099822	HCN2	3.36065	122.034
ENSG00000156510	HKDC1	3.34203	14.2019
ENSG00000163661	PTX3	3.31592	0
ENSG00000248905	FMN1	3.30132	41.6331
ENSG00000133169	BEX1	3.29303	7.80785
ENSG00000166897	ELFN2	3.28846	73.2051
ENSG00000180332	KCTD4	3.28838	9.51572
ENSG00000133107	TRPC4	3.27484	79.0137
ENSG00000184838	PRR16	3.2066	20.4345
ENSG00000225940	C5orf67	3.18957	4.34608
ENSG00000118432	CNR1	3.17813	18.2536
ENSG00000107165	TYRP1	3.15451	11.9672
ENSG00000198846	TOX	3.15176	0
ENSG00000123342	MMP19	3.14123	62.1579
ENSG00000183023	SLC8A1	3.1298	52.5814
ENSG00000183760	ACP7	3.10795	3.88508
ENSG00000106484	MEST	3.06384	0
ENSG00000163347	CLDN1	3.04982	13.5859
ENSG00000146374	RSPO3	3.00452	41.6011
ENSG00000183287	CCBE1	2.97121	251.859
ENSG00000162614	NEXN	2.91246	0
ENSG00000070404	FSTL3	2.88392	245.422
ENSG00000146281	PM20D2	2.85216	200.161
ENSG00000162444	RBP7	2.77464	5.38405
ENSG00000010310	GIPR	2.77396	9.97795
ENSG00000123689	G0S2	2.74355	10.5601
ENSG00000173227	SYT12	2.69936	3.20981
ENSG00000090530	P3H2	2.69632	130.148
ENSG00000162267	ITIH3	2.68284	5.26092
ENSG00000140044	JDP2	2.67279	98.4737
ENSG00000013588	GPRC5A	2.66831	0
ENSG00000124479	NDP	2.66089	15.2221
ENSG00000137463	MGARP	2.65351	294.56
ENSG00000111799	COL12A1	2.64372	0
ENSG00000135480	KRT7	2.63748	0
ENSG00000152078	TMEM56	2.63037	6.5347
ENSG00000146122	DAAM2	2.61442	7.66476
ENSG00000163293	NIPAL1	2.57911	47.2326
ENSG00000120756	PLS1	2.54228	119.177
ENSG00000137573	SULF1	2.524	169.654
ENSG00000095383	TBC1D2	2.50322	103.856
ENSG00000146674	IGFBP3	2.49684	75.7372
ENSG00000178752	ERFE	2.49014	8.20043
ENSG00000240694	PNMA2	2.39777	0
ENSG00000145861	C1QTNF2	2.37071	5.29027
ENSG00000113645	WWC1	2.36745	7.63812
ENSG00000146555	SDK1	2.34709	32.0203
ENSG00000107984	DKK1	2.34624	0
ENSG00000148677	ANKRD1	2.33098	0
ENSG00000182901	RGS7	2.32269	2.50808
ENSG00000162039	MEIOB	2.32222	6.3668
ENSG00000013293	SLC7A14	2.32058	14.9897
ENSG00000161544	CYGB	2.29794	3.36072
ENSG00000144959	NCEH1	2.28564	0
ENSG00000142871	CYR61	2.27986	0
ENSG00000130751	NPAS1	2.25898	5.41608
ENSG00000178031	ADAMTSL1	2.24423	215.877
ENSG00000070669	ASNS	2.2385	7.0702
ENSG00000144583	MARCH4	2.23244	199.698
ENSG00000185697	MYBL1	2.21763	72.5695
ENSG00000163975	MELTF	2.21107	25.1163
ENSG00000167601	AXL	2.20895	0
ENSG00000105376	ICAM5	2.20797	2.619
ENSG00000138131	LOXL4	2.20161	16.9864
ENSG00000169933	FRMPD4	2.19066	3.68189
ENSG00000154127	UBASH3B	2.17038	280.408
ENSG00000185860	CCDC190	2.16964	53.3214
ENSG00000154678	PDE1C	2.16855	220.715
ENSG00000135069	PSAT1	2.15592	265.132
ENSG00000157168	NRG1	2.15118	245.713
ENSG00000113739	STC2	2.13848	264.685
ENSG00000097096	SYDE2	2.13452	32.3551
ENSG00000067798	NAV3	2.13286	253.457
ENSG00000188958	UTS2B	2.12866	6.78117
ENSG00000139734	DIAPH3	2.10634	246.211
ENSG00000197971	MBP	2.09019	73.1024
ENSG00000168811	IL12A	2.08406	8.11123
ENSG00000146648	EGFR	2.08264	142.685
ENSG00000123095	BHLHE41	2.08241	6.71068
ENSG00000078081	LAMP3	2.08022	121.253
ENSG00000106366	SERPINE1	2.05812	0
ENSG00000179242	CDH4	2.05684	7.81843
ENSG00000058085	LAMC2	2.04968	25.0352
ENSG00000187123	LYPD6	2.04951	43.7185
ENSG00000146678	IGFBP1	2.04899	10.5753
ENSG00000162687	KCNT2	2.03984	18.581
ENSG00000170017	ALCAM	2.03699	300.481
ENSG00000101333	PLCB4	2.02584	77.3751
ENSG00000103257	SLC7A5	2.0244	128.302
ENSG00000118523	CTGF	2.02122	0
ENSG00000166073	GPR176	2.01699	206.114
ENSG00000167767	KRT80	2.00937	121.581
ENSG00000133106	EPSTI1	2.00752	17.3213
ENSG00000117143	UAP1	1.98822	0
ENSG00000152056	AP1S3	1.98168	31.9209
ENSG00000171126	KCNG3	1.97774	3.19358
ENSG00000128965	CHAC1	1.97448	27.1246
ENSG00000073737	DHRS9	1.95805	5.0167
ENSG00000173597	SULT1B1	1.95593	185.043
ENSG00000151414	NEK7	1.94903	201.227
ENSG00000101680	LAMA1	1.94873	2.36075
ENSG00000100206	DMC1	1.9435	6.53433
ENSG00000079841	RIMS1	1.94327	8.248
ENSG00000138685	FGF2	1.92828	163.643
ENSG00000153993	SEMA3D	1.91422	72.0969
ENSG00000013297	CLDN11	1.91354	267.779
ENSG00000120129	DUSP1	1.91151	184.39
ENSG00000128165	ADM2	1.9086	14.0006
ENSG00000047365	ARAP2	1.90607	4.24801
ENSG00000178882	RFLNA	1.90534	147.664
ENSG00000124134	KCNS1	1.89474	5.02003
ENSG00000113083	LOX	1.88567	272.487
ENSG00000122420	PTGFR	1.88547	11.1447
ENSG00000172731	LRRC20	1.87464	83.4831
ENSG00000129474	AJUBA	1.87231	178.043
ENSG00000116299	KIAA1324	1.86316	36.0033
ENSG00000108852	MPP2	1.8611	9.71832
ENSG00000092621	PHGDH	1.8474	87.9715
ENSG00000168505	GBX2	1.84661	30.3555
ENSG00000143367	TUFT1	1.82891	41.2258
ENSG00000154734	ADAMTS1	1.81834	123.979
ENSG00000160838	LRRC71	1.81529	7.64728
ENSG00000099860	GADD45B	1.81252	123.284
ENSG00000158258	CLSTN2	1.8057	3.51058
ENSG00000285043	AC093512.2	1.8027	7.27082
ENSG00000145431	PDGFC	1.79437	83.6053
ENSG00000127325	BEST3	1.77967	9.16046
ENSG00000109738	GLRB	1.7794	54.5389
ENSG00000149948	HMGA2	1.7765	261.304
ENSG00000165730	STOX1	1.76702	3.42083
ENSG00000165046	LETM2	1.76692	41.4379
ENSG00000170498	KISS1	1.75926	2.30502
ENSG00000244588	RAD21L1	1.75751	9.18566
ENSG00000103067	ESRP2	1.74985	2.56445
ENSG00000162706	CADM3	1.74489	5.18036
ENSG00000198721	ECI2	1.74208	210.184
ENSG00000109846	CRYAB	1.7395	3.51947
ENSG00000011426	ANLN	1.73861	303.683
ENSG00000140937	CDH11	1.73239	174.932
ENSG00000112246	SIM1	1.7292	5.2953
ENSG00000169594	BNC1	1.72617	169.257
ENSG00000167653	PSCA	1.72486	2.84217
ENSG00000142910	TINAGL1	1.70865	135.438
ENSG00000170396	ZNF804A	1.7056	86.5421
ENSG00000270885	RASL10B	1.7036	2.83068
ENSG00000159708	LRRC36	1.68466	4.7871
ENSG00000138771	SHROOM3	1.67858	19.8025
ENSG00000178343	SHISA3	1.67024	25.9135
ENSG00000121690	DEPDC7	1.66914	5.64544
ENSG00000006327	TNFRSF12A	1.66837	148.367
ENSG00000160886	LY6K	1.66269	10.0735
ENSG00000175592	FOSL1	1.65588	152.219
ENSG00000111057	KRT18	1.65581	273.193
ENSG00000151364	KCTD14	1.65547	1.88013
ENSG00000026508	CD44	1.65433	251.355
ENSG00000269964	MEI4	1.64691	5.38418
ENSG00000164442	CITED2	1.64654	210.77
ENSG00000150281	CTF1	1.63048	3.51663
ENSG00000152952	PLOD2	1.63022	210.463
ENSG00000113356	POLR3G	1.62936	94.1195
ENSG00000143320	CRABP2	1.62694	3.90112
ENSG00000168676	KCTD19	1.62202	3.71304
ENSG00000147697	GSDMC	1.61973	15.002
ENSG00000144810	COL8A1	1.61602	257.137
ENSG00000204856	FAM216A	1.60866	94.8068
ENSG00000094804	CDC6	1.60633	155.596
ENSG00000145242	EPHA5	1.60278	3.27174
ENSG00000081052	COL4A4	1.60203	2.37718
ENSG00000151150	ANK3	1.60104	45.7417
ENSG00000155875	SAXO1	1.60062	2.36737
ENSG00000143153	ATP1B1	1.59392	126.216
ENSG00000160013	PTGIR	1.59264	9.42002
ENSG00000065911	MTHFD2	1.58887	199.874
ENSG00000130164	LDLR	1.58178	160.047
ENSG00000138772	ANXA3	1.57265	170.424
ENSG00000149591	TAGLN	1.57212	30.7892
ENSG00000073464	CLCN4	1.57088	114.984
ENSG00000272031	ANKRD34A	1.56984	7.80793
ENSG00000101335	MYL9	1.54763	115.073
ENSG00000157470	FAM81A	1.54507	1.60048
ENSG00000230453	ANKRD18B	1.5388	38.4981
ENSG00000178821	TMEM52	1.53871	4.53575
ENSG00000136244	IL6	1.53851	22.5321
ENSG00000196196	HRCT1	1.53499	14.0158
ENSG00000117472	TSPAN1	1.53241	2.47105
ENSG00000163739	CXCL1	1.53073	83.2638
ENSG00000174669	SLC29A2	1.52102	6.92366
ENSG00000164023	SGMS2	1.52033	141.247
ENSG00000169429	CXCL8	1.51468	129.886
ENSG00000170743	SYT9	1.51374	6.05866
ENSG00000154188	ANGPT1	1.51317	47.7989
ENSG00000115009	CCL20	1.51272	1.85948
ENSG00000003989	SLC7A2	1.50184	114.162
ENSG00000146530	VWDE	1.49585	4.00316
ENSG00000143375	CGN	1.4915	11.6539
ENSG00000196876	SCN8A	1.49073	141.602
ENSG00000153930	ANKFN1	1.49069	3.53003
ENSG00000102452	NALCN	1.48998	58.4615
ENSG00000165244	ZNF367	1.48335	56.7776
ENSG00000186480	INSIG1	1.47823	115.654
ENSG00000121753	ADGRB2	1.47648	15.1529
ENSG00000226742	HSBP1L1	1.47619	38.5924
ENSG00000242732	RTL5	1.47262	12.4874
ENSG00000143228	NUF2	1.4697	129.511
ENSG00000100473	COCH	1.46574	4.19616
ENSG00000007866	TEAD3	1.46136	14.0392
ENSG00000213694	S1PR3	1.4611	175.183
ENSG00000006047	YBX2	1.46036	2.053
ENSG00000172260	NEGR1	1.45691	86.5744
ENSG00000155970	MICU3	1.45472	29.8938
ENSG00000118515	SGK1	1.44847	212.365
ENSG00000007968	E2F2	1.44236	15.3899
ENSG00000117586	TNFSF4	1.43576	152.149
ENSG00000136010	ALDH1L2	1.43222	40.8419
ENSG00000140379	BCL2A1	1.43217	6.0442
ENSG00000149201	CCDC81	1.4291	3.87679
ENSG00000074416	MGLL	1.42387	131.435
ENSG00000138134	STAMBPL1	1.42327	8.02933
ENSG00000101412	E2F1	1.41502	42.5419
ENSG00000166938	DIS3L	1.41492	103.763
ENSG00000177054	ZDHHC13	1.41457	154.58
ENSG00000174175	SELP	1.41376	20.4332
ENSG00000124145	SDC4	1.41236	112.562
ENSG00000136826	KLF4	1.41162	10.1161
ENSG00000131969	ABHD12B	1.40213	1.74172
ENSG00000145358	DDIT4L	1.39669	14.195
ENSG00000156802	ATAD2	1.39188	111.576
ENSG00000165887	ANKRD2	1.3855	4.09949
ENSG00000147082	CCNB3	1.38217	4.71045
ENSG00000114646	CSPG5	1.38088	4.30044
ENSG00000057019	DCBLD2	1.37981	166.881
ENSG00000021645	NRXN3	1.3771	13.0001
ENSG00000182752	PAPPA	1.37618	4.18307
ENSG00000159216	RUNX1	1.37607	68.1346
ENSG00000166165	CKB	1.37571	7.03759
ENSG00000140416	TPM1	1.37221	154.902
ENSG00000166833	NAV2	1.36981	92.5682
ENSG00000074966	TXK	1.36949	4.51413
ENSG00000163884	KLF15	1.36773	9.42759
ENSG00000170577	SIX2	1.36743	4.78757
ENSG00000179546	HTR1D	1.36726	21.542
ENSG00000166402	TUB	1.36673	13.656
ENSG00000164291	ARSK	1.36619	42.7239
ENSG00000151882	CCL28	1.3659	4.73467
ENSG00000176454	LPCAT4	1.3652	71.6055
ENSG00000006576	PHTF2	1.36473	92.5085
ENSG00000100889	PCK2	1.36137	40.2628
ENSG00000050344	NFE2L3	1.35715	176.794
ENSG00000184368	MAP7D2	1.35684	6.39005
ENSG00000153044	CENPH	1.35421	46.6649
ENSG00000169252	ADRB2	1.3507	9.43565
ENSG00000148082	SHC3	1.35	39.6701
ENSG00000111863	ADTRP	1.34954	44.742
ENSG00000135604	STX11	1.34839	58.9397
ENSG00000196517	SLC6A9	1.34194	3.00601
ENSG00000104881	PPP1R13L	1.34032	72.2097
ENSG00000215784	FAM72D	1.33816	4.34217
ENSG00000114019	AMOTL2	1.33779	153.157
ENSG00000132031	MATN3	1.33557	36.2472
ENSG00000164236	ANKRD33B	1.33263	63.5432
ENSG00000134198	TSPAN2	1.33144	2.32067
ENSG00000134480	CCNH	1.3312	102.662
ENSG00000175643	RMI2	1.33042	31.4195
ENSG00000172244	C5orf34	1.32984	22.5492
ENSG00000129173	E2F8	1.3272	78.0442
ENSG00000184785	SMIM10	1.32567	10.896
ENSG00000180336	MEIOC	1.32443	4.83899
ENSG00000071967	CYBRD1	1.31957	90.3873
ENSG00000081913	PHLPP1	1.3193	61.2452
ENSG00000164211	STARD4	1.31803	101.801
ENSG00000163810	TGM4	1.31628	1.5722
ENSG00000174137	FAM53A	1.3159	4.01375
ENSG00000172927	MYEOV	1.31575	5.73382
ENSG00000175745	NR2F1	1.31406	136.316
ENSG00000123975	CKS2	1.31229	93.9248
ENSG00000137193	PIM1	1.31194	18.7031
ENSG00000198431	TXNRD1	1.31162	182.998
ENSG00000125148	MT2A	1.30539	104.312
ENSG00000253304	TMEM200B	1.30432	1.60933
ENSG00000161888	SPC24	1.29993	66.3705
ENSG00000204516	MICB	1.29749	98.0375
ENSG00000138182	KIF20B	1.29714	104.108
ENSG00000186603	HPDL	1.2968	5.15454
ENSG00000149177	PTPRJ	1.29591	102.079
ENSG00000164142	FAM160A1	1.2958	2.23837
ENSG00000124171	PARD6B	1.29558	1.89187
ENSG00000135045	C9orf40	1.29287	23.8861
ENSG00000114346	ECT2	1.29112	106.362
ENSG00000179833	SERTAD2	1.29109	93.6295
ENSG00000188042	ARL4C	1.29097	33.8879
ENSG00000167536	DHRS13	1.28982	3.2848
ENSG00000134250	NOTCH2	1.28883	135.505
ENSG00000091622	PITPNM3	1.28836	12.8392
ENSG00000171848	RRM2	1.28817	120.216
ENSG00000107954	NEURL1	1.28481	1.73168
ENSG00000149548	CCDC15	1.28475	13.4246
ENSG00000276043	UHRF1	1.28158	45.8209
ENSG00000073734	ABCB11	1.28016	4.13893
ENSG00000168140	VASN	1.27914	3.59356
ENSG00000249992	TMEM158	1.27737	4.19275
ENSG00000156675	RAB11FIP1	1.27686	18.4685
ENSG00000138675	FGF5	1.27016	3.05019
ENSG00000205309	NT5M	1.26825	3.0144
ENSG00000065361	ERBB3	1.2652	1.66364
ENSG00000169715	MT1E	1.26431	78.7386
ENSG00000117479	SLC19A2	1.26004	37.8923
ENSG00000073111	MCM2	1.25776	72.7511
ENSG00000141198	TOM1L1	1.25698	9.91824
ENSG00000118985	ELL2	1.25583	78.7559
ENSG00000164949	GEM	1.25548	3.65657
ENSG00000128944	KNSTRN	1.25316	86.8115
ENSG00000130956	HABP4	1.25157	40.4391
ENSG00000125746	EML2	1.25073	36.2341
ENSG00000205362	MT1A	1.24899	2.12827
ENSG00000198363	ASPH	1.24866	121.004
ENSG00000137807	KIF23	1.24858	123.497
ENSG00000072958	AP1M1	1.24836	84.2218
ENSG00000102554	KLF5	1.24566	12.4429
ENSG00000163453	IGFBP7	1.24447	152.147
ENSG00000113721	PDGFRB	1.24436	1.95868
ENSG00000182263	FIGN	1.24288	41.5417
ENSG00000145681	HAPLN1	1.24198	7.41645
ENSG00000139874	SSTR1	1.23865	6.98701
ENSG00000143674	MAP3K21	1.23697	7.82113
ENSG00000109674	NEIL3	1.23356	25.6488
ENSG00000039139	DNAH5	1.23267	2.71973
ENSG00000053747	LAMA3	1.22793	58.3821
ENSG00000151572	ANO4	1.22576	3.17496
ENSG00000147394	ZNF185	1.22376	121.851
ENSG00000167900	TK1	1.22292	60.7528
ENSG00000164509	IL31RA	1.22234	13.3222
ENSG00000115295	CLIP4	1.22083	64.5307
ENSG00000052802	MSMO1	1.21468	84.3544
ENSG00000104611	SH2D4A	1.21206	5.6308
ENSG00000164649	CDCA7L	1.21193	128.957
ENSG00000105011	ASF1B	1.211	58.1596
ENSG00000173706	HEG1	1.21087	155.141
ENSG00000145386	CCNA2	1.20972	121.119
ENSG00000073670	ADAM11	1.20873	3.46476
ENSG00000161800	RACGAP1	1.20801	86.0571
ENSG00000179148	ALOXE3	1.20758	1.73247
ENSG00000180535	BHLHA15	1.20696	1.82352
ENSG00000123485	HJURP	1.20674	84.0244
ENSG00000183779	ZNF703	1.20409	29.9219
ENSG00000164109	MAD2L1	1.20315	75.8059
ENSG00000112186	CAP2	1.20309	23.0209
ENSG00000144152	FBLN7	1.19907	2.97104
ENSG00000029639	TFB1M	1.19733	29.2088
ENSG00000101057	MYBL2	1.19132	86.4781
ENSG00000235162	C12orf75	1.19084	62.2787
ENSG00000100162	CENPM	1.18902	14.0585
ENSG00000008256	CYTH3	1.18874	60.99
ENSG00000171476	HOPX	1.18856	5.31397
ENSG00000167779	IGFBP6	1.18472	17.5508
ENSG00000011201	ANOS1	1.18441	7.55776
ENSG00000166451	CENPN	1.18321	51.4902
ENSG00000149929	HIRIP3	1.17802	27.8743
ENSG00000067064	IDI1	1.17739	73.7434
ENSG00000132563	REEP2	1.17737	15.8984
ENSG00000131153	GINS2	1.17687	48.7984
ENSG00000188211	NCR3LG1	1.17051	32.1922
ENSG00000123219	CENPK	1.17041	43.7059
ENSG00000179348	GATA2	1.17026	88.3228
ENSG00000156509	FBXO43	1.1689	7.18915
ENSG00000164611	PTTG1	1.16854	109.756
ENSG00000115758	ODC1	1.16724	137.507
ENSG00000104884	ERCC2	1.16649	60.1322
ENSG00000173207	CKS1B	1.16396	39.0526
ENSG00000145287	PLAC8	1.16373	5.50405
ENSG00000051341	POLQ	1.15996	45.6096
ENSG00000076003	MCM6	1.1592	95.0941
ENSG00000142494	SLC47A1	1.15875	21.278
ENSG00000159399	HK2	1.15848	67.3957
ENSG00000073792	IGF2BP2	1.15799	164.132
ENSG00000157224	CLDN12	1.15752	51.1642
ENSG00000180340	FZD2	1.1574	10.7645
ENSG00000093009	CDC45	1.15613	57.2712
ENSG00000120437	ACAT2	1.1559	58.7572
ENSG00000146267	FAXC	1.15547	2.21376
ENSG00000127564	PKMYT1	1.15498	12.1644
ENSG00000072571	HMMR	1.15102	84.776
ENSG00000101307	SIRPB1	1.14941	1.70801
ENSG00000163918	RFC4	1.14846	44.2814
ENSG00000168685	IL7R	1.14817	32.2309
ENSG00000138180	CEP55	1.14748	111.022
ENSG00000092470	WDR76	1.1471	51.2711
ENSG00000152465	NMT2	1.1462	106.186
ENSG00000122641	INHBA	1.14588	49.3838
ENSG00000150551	LYPD1	1.14495	7.16812
ENSG00000164176	EDIL3	1.14492	57.4344
ENSG00000150630	VEGFC	1.14482	66.665
ENSG00000145147	SLIT2	1.14442	78.7496
ENSG00000071539	TRIP13	1.1441	74.0956
ENSG00000077684	JADE1	1.14386	75.902
ENSG00000183856	IQGAP3	1.14264	82.421
ENSG00000040275	SPDL1	1.14148	86.7174
ENSG00000133256	PDE6B	1.14103	2.179
ENSG00000166912	MTMR10	1.14042	85.068
ENSG00000178773	CPNE7	1.13729	14.2443
ENSG00000101911	PRPS2	1.13683	50.5057
ENSG00000154229	PRKCA	1.13386	104.707
ENSG00000163923	RPL39L	1.1337	25.0859
ENSG00000168078	PBK	1.13349	59.9298
ENSG00000159200	RCAN1	1.13322	55.2865
ENSG00000151725	CENPU	1.1331	54.0893
ENSG00000115163	CENPA	1.13238	30.9071
ENSG00000132016	C19orf57	1.13097	2.1131
ENSG00000024526	DEPDC1	1.13079	66.3266
ENSG00000175591	P2RY2	1.12538	5.04022
ENSG00000136997	MYC	1.12199	89.3001
ENSG00000102466	FGF14	1.11846	1.75226
ENSG00000142731	PLK4	1.11825	71.1301
ENSG00000196526	AFAP1	1.11822	128.029
ENSG00000178038	ALS2CL	1.11749	23.0911
ENSG00000117155	SSX2IP	1.11523	30.6359
ENSG00000204767	INSYN2B	1.11404	26.3445
ENSG00000119514	GALNT12	1.11322	5.04795
ENSG00000146411	SLC2A12	1.11223	13.1102
ENSG00000198056	PRIM1	1.11211	18.3236
ENSG00000184445	KNTC1	1.11127	62.0941
ENSG00000112619	PRPH2	1.11099	2.1685
ENSG00000170312	CDK1	1.11094	96.4779
ENSG00000120738	EGR1	1.11001	27.5668
ENSG00000173145	NOC3L	1.10937	57.492
ENSG00000198826	ARHGAP11A	1.10911	64.391
ENSG00000099194	SCD	1.10837	134.297
ENSG00000177425	PAWR	1.10573	73.1022
ENSG00000144354	CDCA7	1.1052	54.2291
ENSG00000112210	RAB23	1.1037	29.0608
ENSG00000133119	RFC3	1.10272	44.3079
ENSG00000136982	DSCC1	1.10244	16.2846
ENSG00000165171	METTL27	1.10152	4.19702
ENSG00000116133	DHCR24	1.10027	72.4279
ENSG00000184347	SLIT3	1.09959	6.65272
ENSG00000126860	EVI2A	1.09927	1.7285
ENSG00000115902	SLC1A4	1.09857	37.1664
ENSG00000158296	SLC13A3	1.09802	1.65476
ENSG00000165480	SKA3	1.09779	58.3199
ENSG00000109255	NMU	1.0977	1.88273
ENSG00000068489	PRR11	1.09673	92.3779
ENSG00000085999	RAD54L	1.09619	18.7582
ENSG00000145088	EAF2	1.09618	3.77741
ENSG00000106006	HOXA6	1.09611	7.61029
ENSG00000187098	MITF	1.09586	16.5776
ENSG00000104738	MCM4	1.09456	87.2793
ENSG00000221968	FADS3	1.09265	62.5368
ENSG00000197343	ZNF655	1.09121	41.3244
ENSG00000067533	RRP15	1.09114	62.5029
ENSG00000186871	ERCC6L	1.0889	31.2671
ENSG00000176788	BASP1	1.08632	129.019
ENSG00000100526	CDKN3	1.08605	46.1607
ENSG00000205683	DPF3	1.08534	24.9181
ENSG00000132182	NUP210	1.0846	6.7494
ENSG00000138778	CENPE	1.08378	76.7493
ENSG00000121621	KIF18A	1.08181	52.8973
ENSG00000166741	NNMT	1.08092	86.79
ENSG00000100479	POLE2	1.07927	23.3451
ENSG00000171241	SHCBP1	1.07742	78.76
ENSG00000121152	NCAPH	1.07588	58.4653
ENSG00000165304	MELK	1.07546	84.8468
ENSG00000114529	C3orf52	1.07524	7.73991
ENSG00000239887	C1orf226	1.07453	20.7787
ENSG00000101542	CDH20	1.07262	1.67964
ENSG00000111247	RAD51AP1	1.07074	42.9705
ENSG00000171320	ESCO2	1.06888	32.7585
ENSG00000169679	BUB1	1.0685	98.304
ENSG00000185950	IRS2	1.06789	10.8388
ENSG00000170558	CDH2	1.06401	55.7582
ENSG00000154027	AK5	1.06339	19.6106
ENSG00000164087	POC1A	1.06278	22.5803
ENSG00000083067	TRPM3	1.06228	1.59557
ENSG00000198929	NOS1AP	1.06196	9.96349
ENSG00000122592	HOXA7	1.06027	17.3479
ENSG00000131773	KHDRBS3	1.05881	29.8791
ENSG00000154839	SKA1	1.05848	43.1348
ENSG00000158402	CDC25C	1.05836	29.8445
ENSG00000119326	CTNNAL1	1.05824	103.324
ENSG00000100401	RANGAP1	1.05719	71.283
ENSG00000132639	SNAP25	1.05591	1.67358
ENSG00000117650	NEK2	1.05515	44.9378
ENSG00000129810	SGO1	1.05411	26.1047
ENSG00000105997	HOXA3	1.05266	20.3554
ENSG00000181544	FANCB	1.05194	11.2381
ENSG00000161647	MPP3	1.0509	15.6365
ENSG00000187210	GCNT1	1.05088	62.1217
ENSG00000101003	GINS1	1.05078	39.5671
ENSG00000141384	TAF4B	1.05052	14.3903
ENSG00000159259	CHAF1B	1.05051	35.5687
ENSG00000113810	SMC4	1.04839	76.0135
ENSG00000066651	TRMT11	1.04777	26.2905
ENSG00000135046	ANXA1	1.04514	104.075
ENSG00000178999	AURKB	1.04387	44.0712
ENSG00000198814	GK	1.04364	11.0904
ENSG00000136158	SPRY2	1.04353	45.2488
ENSG00000048740	CELF2	1.04174	69.5446
ENSG00000100297	MCM5	1.03989	52.3303
ENSG00000147536	GINS4	1.03914	25.4272
ENSG00000106789	CORO2A	1.03774	8.34917
ENSG00000157214	STEAP2	1.03766	26.5166
ENSG00000131351	HAUS8	1.03743	18.9474
ENSG00000151718	WWC2	1.03602	74.0527
ENSG00000117477	CCDC181	1.03563	3.75913
ENSG00000070950	RAD18	1.0354	41.7758
ENSG00000077152	UBE2T	1.03416	33.1142
ENSG00000134548	SPX	1.03199	1.68176
ENSG00000156970	BUB1B	1.03171	81.0661
ENSG00000176678	FOXL1	1.02998	14.4731
ENSG00000117395	EBNA1BP2	1.02995	78.6077
ENSG00000151491	EPS8	1.02933	64.582
ENSG00000037965	HOXC8	1.0292	1.7217
ENSG00000169126	ARMC4	1.02852	7.99311
ENSG00000172167	MTBP	1.02608	25.6399
ENSG00000124875	CXCL6	1.02534	1.91102
ENSG00000117245	KIF17	1.02487	1.87286
ENSG00000165732	DDX21	1.02331	98.6824
ENSG00000165072	MAMDC2	1.02316	2.14545
ENSG00000156466	GDF6	1.02266	25.6883
ENSG00000167513	CDT1	1.02246	16.9491
ENSG00000116761	CTH	1.01928	8.80844
ENSG00000109743	BST1	1.01832	26.5384
ENSG00000141458	NPC1	1.01739	56.7353
ENSG00000014138	POLA2	1.01686	7.22947
ENSG00000157456	CCNB2	1.01677	68.3265
ENSG00000020577	SAMD4A	1.01614	78.0682
ENSG00000198947	DMD	1.01579	29.622
ENSG00000133863	TEX15	1.01567	13.3427
ENSG00000198542	ITGBL1	1.01473	9.52246
ENSG00000186166	CCDC84	1.01383	17.7781
ENSG00000185008	ROBO2	1.01192	3.4569
ENSG00000088325	TPX2	1.0116	116.591
ENSG00000142945	KIF2C	1.01142	58.9008
ENSG00000168765	GSTM4	1.01127	10.2345
ENSG00000142949	PTPRF	1.00995	71.2463
ENSG00000065328	MCM10	1.00704	41.4309
ENSG00000001460	STPG1	1.00492	18.3137
ENSG00000171451	DSEL	1.00462	20.128
ENSG00000185238	PRMT3	1.00228	41.2068
ENSG00000127423	AUNIP	1.00199	10.1401
ENSG00000169710	FASN	1.00189	9.71052

## Sheet: TAZ S89A_upregulated
Ensembl gene ID	Ensembl gene	log2(TAZ S89A/Ctrl)	-log10(P value)
ENSG00000128510	CPA4	6.29878	71.909
ENSG00000176532	PRR15	6.25617	84.3291
ENSG00000225940	C5orf67	5.74069	11.2666
ENSG00000092969	TGFB2	5.32581	0
ENSG00000184838	PRR16	5.00316	63.5549
ENSG00000198121	LPAR1	4.82023	7.77106
ENSG00000109193	SULT1E1	4.73025	36.3589
ENSG00000152779	SLC16A12	4.63956	16.9866
ENSG00000171385	KCND3	4.61343	9.91702
ENSG00000137573	SULF1	4.3646	0
ENSG00000134363	FST	4.20154	40.7649
ENSG00000013293	SLC7A14	4.0051	62.5861
ENSG00000182901	RGS7	3.93921	7.01071
ENSG00000043591	ADRB1	3.89717	10.4642
ENSG00000146374	RSPO3	3.88027	81.221
ENSG00000176697	BDNF	3.85268	167.978
ENSG00000120337	TNFSF18	3.68562	0
ENSG00000023608	SNAPC1	3.48944	0
ENSG00000160255	ITGB2	3.45893	10.4649
ENSG00000183287	CCBE1	3.4471	0
ENSG00000106484	MEST	3.38075	0
ENSG00000057294	PKP2	3.37252	61.1265
ENSG00000137463	MGARP	3.31575	0
ENSG00000189410	SH2D5	3.29991	20.5635
ENSG00000135480	KRT7	3.21267	0
ENSG00000198846	TOX	3.20281	0
ENSG00000163661	PTX3	3.13526	0
ENSG00000117152	RGS4	3.11661	0
ENSG00000133169	BEX1	3.08742	6.80553
ENSG00000140044	JDP2	3.08707	133.178
ENSG00000107984	DKK1	3.06357	0
ENSG00000128165	ADM2	3.06243	45.6451
ENSG00000090530	P3H2	3.04648	185.43
ENSG00000075223	SEMA3C	3.00086	5.5461
ENSG00000148677	ANKRD1	2.96942	0
ENSG00000188112	C6orf132	2.96931	14.7518
ENSG00000188783	PRELP	2.94668	4.85099
ENSG00000135069	PSAT1	2.90792	0
ENSG00000158246	TENT5B	2.90633	13.9948
ENSG00000166897	ELFN2	2.90126	52.1582
ENSG00000143869	GDF7	2.90104	33.1657
ENSG00000163347	CLDN1	2.8994	11.5911
ENSG00000179242	CDH4	2.89487	17.7689
ENSG00000133107	TRPC4	2.88694	55.4675
ENSG00000178882	RFLNA	2.84564	0
ENSG00000123977	DAW1	2.82966	91.7022
ENSG00000154319	FAM167A	2.80456	6.47637
ENSG00000169933	FRMPD4	2.7933	6.22421
ENSG00000189068	VSTM1	2.75752	3.4029
ENSG00000118432	CNR1	2.75432	12.64
ENSG00000162614	NEXN	2.71397	0
ENSG00000092621	PHGDH	2.65414	269.774
ENSG00000105929	ATP6V0A4	2.63171	6.4037
ENSG00000205362	MT1A	2.62301	12.1031
ENSG00000240694	PNMA2	2.62298	0
ENSG00000013588	GPRC5A	2.61683	0
ENSG00000070404	FSTL3	2.59212	176.779
ENSG00000140284	SLC27A2	2.56878	2.94593
ENSG00000146281	PM20D2	2.5592	179.52
ENSG00000070669	ASNS	2.54553	9.44216
ENSG00000156510	HKDC1	2.5318	7.02258
ENSG00000178752	ERFE	2.51582	8.13646
ENSG00000185860	CCDC190	2.50749	75.8565
ENSG00000157168	NRG1	2.50287	0
ENSG00000128965	CHAC1	2.50064	55.24
ENSG00000111799	COL12A1	2.49	0
ENSG00000248905	FMN1	2.48638	19.1647
ENSG00000107165	TYRP1	2.43969	6.61275
ENSG00000007350	TKTL1	2.41901	6.76757
ENSG00000004776	HSPB6	2.41554	20.5507
ENSG00000013297	CLDN11	2.40783	0
ENSG00000103257	SLC7A5	2.39588	214.521
ENSG00000163293	NIPAL1	2.38692	37.8703
ENSG00000099860	GADD45B	2.38676	255.454
ENSG00000185761	ADAMTSL5	2.35494	2.57792
ENSG00000146122	DAAM2	2.35066	5.75332
ENSG00000112246	SIM1	2.33502	10.8121
ENSG00000136010	ALDH1L2	2.33118	129.633
ENSG00000183023	SLC8A1	2.30614	22.5851
ENSG00000162706	CADM3	2.29279	10.0034
ENSG00000113739	STC2	2.25757	0
ENSG00000146555	SDK1	2.23395	27.9373
ENSG00000138685	FGF2	2.22354	249.201
ENSG00000095383	TBC1D2	2.21664	81.7463
ENSG00000196517	SLC6A9	2.20957	9.31512
ENSG00000153930	ANKFN1	2.20863	8.50097
ENSG00000117143	UAP1	2.20685	0
ENSG00000144583	MARCH4	2.20644	174.666
ENSG00000167601	AXL	2.20304	0
ENSG00000138356	AOX1	2.16017	11.8055
ENSG00000070159	PTPN3	2.15391	2.18001
ENSG00000154678	PDE1C	2.14337	225.14
ENSG00000185697	MYBL1	2.13023	71.5899
ENSG00000144810	COL8A1	2.1292	0
ENSG00000123342	MMP19	2.11657	20.1134
ENSG00000113645	WWC1	2.11346	5.16652
ENSG00000174669	SLC29A2	2.09409	14.8428
ENSG00000018408	WWTR1	2.07444	295.728
ENSG00000172260	NEGR1	2.06856	226.193
ENSG00000153993	SEMA3D	2.06345	75.7135
ENSG00000197971	MBP	2.04484	63.3314
ENSG00000173597	SULT1B1	2.02616	282.072
ENSG00000123689	G0S2	2.01598	4.76908
ENSG00000186480	INSIG1	2.01483	213.466
ENSG00000187123	LYPD6	2.0131	40.7023
ENSG00000118523	CTGF	2.00519	0
ENSG00000100889	PCK2	1.99218	127.067
ENSG00000170577	SIX2	1.99133	11.0349
ENSG00000151414	NEK7	1.97587	245.279
ENSG00000065911	MTHFD2	1.97299	255.621
ENSG00000129474	AJUBA	1.97039	230.871
ENSG00000106366	SERPINE1	1.96412	0
ENSG00000132561	MATN2	1.96183	50.3841
ENSG00000142871	CYR61	1.95073	0
ENSG00000122641	INHBA	1.94767	151.445
ENSG00000139734	DIAPH3	1.93621	228.247
ENSG00000138772	ANXA3	1.92724	239.657
ENSG00000162039	MEIOB	1.92313	4.00544
ENSG00000170017	ALCAM	1.91552	278.209
ENSG00000154027	AK5	1.91302	75.112
ENSG00000165323	FAT3	1.8937	5.00138
ENSG00000154175	ABI3BP	1.88798	195.296
ENSG00000120756	PLS1	1.87568	56.7544
ENSG00000167767	KRT80	1.87315	102.545
ENSG00000221916	C19orf73	1.86848	2.77169
ENSG00000148154	UGCG	1.86601	217.953
ENSG00000145287	PLAC8	1.85481	15.1247
ENSG00000138771	SHROOM3	1.85234	24.3035
ENSG00000113083	LOX	1.84494	255.826
ENSG00000166073	GPR176	1.84342	180.122
ENSG00000161544	CYGB	1.83279	2.10782
ENSG00000157470	FAM81A	1.8295	2.0564
ENSG00000198889	DCAF12L1	1.82269	7.64375
ENSG00000158258	CLSTN2	1.82189	3.48131
ENSG00000169715	MT1E	1.81964	201.201
ENSG00000081052	COL4A4	1.8191	3.11049
ENSG00000126562	WNK4	1.81762	6.40193
ENSG00000178343	SHISA3	1.81477	31.1632
ENSG00000178031	ADAMTSL1	1.80851	147.724
ENSG00000118515	SGK1	1.79006	0
ENSG00000142910	TINAGL1	1.7892	171.908
ENSG00000163884	KLF15	1.78846	16.9144
ENSG00000171126	KCNG3	1.78768	2.5848
ENSG00000164236	ANKRD33B	1.78691	132.124
ENSG00000166912	MTMR10	1.78628	255.86
ENSG00000172927	MYEOV	1.78357	11.3311
ENSG00000164442	CITED2	1.77432	232.898
ENSG00000163810	TGM4	1.74573	2.52533
ENSG00000169594	BNC1	1.74436	166.121
ENSG00000078081	LAMP3	1.74173	76.3378
ENSG00000186603	HPDL	1.72082	9.78904
ENSG00000116761	CTH	1.71682	28.359
ENSG00000136546	SCN7A	1.7161	2.34385
ENSG00000138675	FGF5	1.71256	5.78839
ENSG00000230453	ANKRD18B	1.7096	39.6259
ENSG00000124479	NDP	1.70664	5.04641
ENSG00000269964	MEI4	1.69988	5.71781
ENSG00000145358	DDIT4L	1.69974	21.4807
ENSG00000170396	ZNF804A	1.69579	82.2941
ENSG00000138131	LOXL4	1.68836	8.79277
ENSG00000148082	SHC3	1.68757	63.0669
ENSG00000113356	POLR3G	1.68491	109.794
ENSG00000213694	S1PR3	1.68186	238.84
ENSG00000073737	DHRS9	1.68102	3.46375
ENSG00000097096	SYDE2	1.67949	16.9373
ENSG00000137193	PIM1	1.67895	32.9118
ENSG00000144959	NCEH1	1.66758	231.296
ENSG00000074966	TXK	1.66495	6.63193
ENSG00000125965	GDF5	1.66306	1.90529
ENSG00000136244	IL6	1.66245	26.2354
ENSG00000111057	KRT18	1.66123	271.557
ENSG00000180535	BHLHA15	1.65628	3.68624
ENSG00000179546	HTR1D	1.65066	32.5698
ENSG00000081913	PHLPP1	1.64484	101.376
ENSG00000125148	MT2A	1.64199	31.2837
ENSG00000130164	LDLR	1.63729	187.365
ENSG00000152056	AP1S3	1.63373	19.4766
ENSG00000159708	LRRC36	1.62523	4.18935
ENSG00000132639	SNAP25	1.62172	3.54368
ENSG00000145431	PDGFC	1.62038	65.7861
ENSG00000123095	BHLHE41	1.61359	3.72458
ENSG00000154127	UBASH3B	1.61089	143.412
ENSG00000117586	TNFSF4	1.60883	168.058
ENSG00000188042	ARL4C	1.60465	62.2291
ENSG00000165171	METTL27	1.60384	9.4996
ENSG00000198431	TXNRD1	1.60222	225.904
ENSG00000205177	C11orf91	1.6	1.77815
ENSG00000183779	ZNF703	1.59134	49.951
ENSG00000168505	GBX2	1.5879	19.7949
ENSG00000099194	SCD	1.5802	304.705
ENSG00000168811	IL12A	1.57773	4.42371
ENSG00000177425	PAWR	1.57633	169.339
ENSG00000170498	KISS1	1.57444	1.82946
ENSG00000152952	PLOD2	1.5744	202.467
ENSG00000211448	DIO2	1.57089	4.6883
ENSG00000120129	DUSP1	1.56713	128.485
ENSG00000052802	MSMO1	1.56055	164.745
ENSG00000079841	RIMS1	1.55895	4.71794
ENSG00000104881	PPP1R13L	1.5501	78.7955
ENSG00000172731	LRRC20	1.54207	50.6426
ENSG00000146648	EGFR	1.54012	66.8749
ENSG00000167748	KLK1	1.5201	1.61491
ENSG00000100526	CDKN3	1.51287	86.9223
ENSG00000175592	FOSL1	1.51167	110.859
ENSG00000102466	FGF14	1.51164	3.04149
ENSG00000253304	TMEM200B	1.5047	1.97899
ENSG00000067064	IDI1	1.50199	128.617
ENSG00000136573	BLK	1.49539	2.22839
ENSG00000204856	FAM216A	1.49501	81.0898
ENSG00000143153	ATP1B1	1.49349	89.9777
ENSG00000125378	BMP4	1.48598	148.052
ENSG00000111863	ADTRP	1.48165	52.6849
ENSG00000133256	PDE6B	1.48063	3.58197
ENSG00000164611	PTTG1	1.48037	156.202
ENSG00000117395	EBNA1BP2	1.47421	174.42
ENSG00000143228	NUF2	1.46884	109.808
ENSG00000145242	EPHA5	1.46012	2.68418
ENSG00000178821	TMEM52	1.45973	3.94205
ENSG00000003989	SLC7A2	1.45217	122.714
ENSG00000169710	FASN	1.44433	33.2343
ENSG00000075213	SEMA3A	1.44399	57.5654
ENSG00000149948	HMGA2	1.44299	204.344
ENSG00000006327	TNFRSF12A	1.43937	119.599
ENSG00000011426	ANLN	1.43885	232.058
ENSG00000178773	CPNE7	1.43659	19.1851
ENSG00000153044	CENPH	1.43541	52.6295
ENSG00000100206	DMC1	1.43206	3.15029
ENSG00000072041	SLC6A15	1.43153	2.21841
ENSG00000117479	SLC19A2	1.42554	46.2145
ENSG00000244588	RAD21L1	1.417	5.37667
ENSG00000006576	PHTF2	1.41573	119.589
ENSG00000115963	RND3	1.41151	159.005
ENSG00000169252	ADRB2	1.41116	9.40121
ENSG00000074416	MGLL	1.40982	131.542
ENSG00000136826	KLF4	1.40744	9.79914
ENSG00000168843	FSTL5	1.40624	7.80248
ENSG00000152078	TMEM56	1.39945	1.69272
ENSG00000123975	CKS2	1.39799	84.0151
ENSG00000180332	KCTD4	1.39754	1.5934
ENSG00000156466	GDF6	1.39552	54.1387
ENSG00000048740	CELF2	1.38967	147.626
ENSG00000029639	TFB1M	1.38876	40.1546
ENSG00000123485	HJURP	1.38744	121.279
ENSG00000188211	NCR3LG1	1.38532	50.6599
ENSG00000112972	HMGCS1	1.38249	110.519
ENSG00000132915	PDE6A	1.37878	1.70959
ENSG00000152465	NMT2	1.37187	142.043
ENSG00000145386	CCNA2	1.37013	168.073
ENSG00000140416	TPM1	1.37003	209.05
ENSG00000091622	PITPNM3	1.35993	13.8451
ENSG00000115902	SLC1A4	1.35707	57.2636
ENSG00000183856	IQGAP3	1.35331	102.983
ENSG00000151012	SLC7A11	1.34767	126.192
ENSG00000146674	IGFBP3	1.34423	16.3045
ENSG00000160886	LY6K	1.34311	5.99652
ENSG00000136997	MYC	1.34001	122.626
ENSG00000159216	RUNX1	1.33996	64.261
ENSG00000170558	CDH2	1.33911	96.2613
ENSG00000073464	CLCN4	1.33717	91.4413
ENSG00000198947	DMD	1.33424	59.083
ENSG00000124134	KCNS1	1.33153	2.2759
ENSG00000108852	MPP2	1.33096	4.1912
ENSG00000196876	SCN8A	1.33029	99.6268
ENSG00000165046	LETM2	1.33009	19.3169
ENSG00000165175	MID1IP1	1.3268	46.7648
ENSG00000094804	CDC6	1.32627	102.256
ENSG00000149485	FADS1	1.32049	145.197
ENSG00000026508	CD44	1.31391	171.77
ENSG00000120437	ACAT2	1.31319	70.5895
ENSG00000100162	CENPM	1.31079	16.6736
ENSG00000171848	RRM2	1.31062	145.117
ENSG00000183010	PYCR1	1.30749	62.0857
ENSG00000182379	NXPH4	1.30706	2.01068
ENSG00000214517	PPME1	1.30688	114.18
ENSG00000128944	KNSTRN	1.30665	91.93
ENSG00000168676	KCTD19	1.30442	2.43397
ENSG00000154188	ANGPT1	1.30331	34.977
ENSG00000058085	LAMC2	1.29813	7.99734
ENSG00000198901	PRC1	1.29767	6.91018
ENSG00000164211	STARD4	1.29162	102.209
ENSG00000135604	STX11	1.29008	50.4665
ENSG00000172216	CEBPB	1.28958	27.5449
ENSG00000138182	KIF20B	1.28789	106.773
ENSG00000168078	PBK	1.28604	75.3598
ENSG00000109674	NEIL3	1.28602	21.7213
ENSG00000147697	GSDMC	1.28563	8.56217
ENSG00000127564	PKMYT1	1.28345	13.4567
ENSG00000198353	HOXC4	1.28119	1.89078
ENSG00000067798	NAV3	1.27509	79.725
ENSG00000188958	UTS2B	1.27249	2.21101
ENSG00000090861	AARS	1.26944	161.996
ENSG00000163453	IGFBP7	1.26518	160.24
ENSG00000106327	TFR2	1.26489	1.93795
ENSG00000173207	CKS1B	1.26266	45.0398
ENSG00000144354	CDCA7	1.2616	70.8136
ENSG00000130956	HABP4	1.26107	36.7073
ENSG00000176788	BASP1	1.26097	145.522
ENSG00000131153	GINS2	1.26086	54.474
ENSG00000135045	C9orf40	1.25823	19.2873
ENSG00000077152	UBE2T	1.25711	50.314
ENSG00000169679	BUB1	1.25478	139.36
ENSG00000150551	LYPD1	1.25297	8.84276
ENSG00000161800	RACGAP1	1.25277	97.4774
ENSG00000146678	IGFBP1	1.25206	3.06941
ENSG00000161888	SPC24	1.24939	59.1633
ENSG00000164109	MAD2L1	1.24654	72.8905
ENSG00000198298	ZNF485	1.24538	5.53174
ENSG00000117650	NEK2	1.23566	53.3091
ENSG00000101911	PRPS2	1.2354	57.3006
ENSG00000239887	C1orf226	1.23179	30.6178
ENSG00000143674	MAP3K21	1.2312	7.58582
ENSG00000104147	OIP5	1.23111	11.6663
ENSG00000017483	SLC38A5	1.23047	27.784
ENSG00000164649	CDCA7L	1.22778	132.85
ENSG00000117399	CDC20	1.22646	102.145
ENSG00000145088	EAF2	1.22528	4.54587
ENSG00000172893	DHCR7	1.2249	66.8079
ENSG00000121690	DEPDC7	1.22145	2.64797
ENSG00000102452	NALCN	1.22096	35.2908
ENSG00000143367	TUFT1	1.21954	15.3124
ENSG00000114346	ECT2	1.21857	88.3478
ENSG00000165244	ZNF367	1.21698	36.2023
ENSG00000115163	CENPA	1.21651	36.575
ENSG00000040275	SPDL1	1.21647	101.867
ENSG00000136158	SPRY2	1.21496	59.7205
ENSG00000106105	GARS	1.21417	197.426
ENSG00000109738	GLRB	1.2134	20.03
ENSG00000156802	ATAD2	1.21258	109.978
ENSG00000182199	SHMT2	1.21191	132.349
ENSG00000167900	TK1	1.21096	64.3533
ENSG00000134480	CCNH	1.21074	91.5719
ENSG00000105011	ASF1B	1.20995	57.4708
ENSG00000163739	CXCL1	1.20912	46.9835
ENSG00000021645	NRXN3	1.209	9.37659
ENSG00000118985	ELL2	1.20846	89.0679
ENSG00000121211	MND1	1.2061	15.4657
ENSG00000112208	BAG2	1.20594	43.0523
ENSG00000158402	CDC25C	1.20568	38.9007
ENSG00000166938	DIS3L	1.20513	73.3098
ENSG00000157456	CCNB2	1.20391	83.2991
ENSG00000196526	AFAP1	1.20337	147.224
ENSG00000039139	DNAH5	1.2027	2.37194
ENSG00000186193	SAPCD2	1.20202	32.4088
ENSG00000109084	TMEM97	1.20032	55.3524
ENSG00000120254	MTHFD1L	1.19982	114.535
ENSG00000132182	NUP210	1.19796	8.51075
ENSG00000071539	TRIP13	1.19583	80.5889
ENSG00000150630	VEGFC	1.19426	68.9351
ENSG00000075711	DLG1	1.19425	138.216
ENSG00000141384	TAF4B	1.19375	19.0149
ENSG00000140937	CDH11	1.19292	90.9042
ENSG00000101057	MYBL2	1.19214	86.6203
ENSG00000073734	ABCB11	1.19192	4.39519
ENSG00000131773	KHDRBS3	1.19075	35.3897
ENSG00000243710	CFAP57	1.1856	10.5423
ENSG00000175745	NR2F1	1.18529	112.224
ENSG00000182263	FIGN	1.18439	37.9762
ENSG00000050344	NFE2L3	1.18266	126.582
ENSG00000137135	ARHGEF39	1.18163	11.8972
ENSG00000189221	MAOA	1.17973	82.2893
ENSG00000205309	NT5M	1.17896	2.45422
ENSG00000067057	PFKP	1.17711	120.539
ENSG00000175591	P2RY2	1.17692	5.71106
ENSG00000091483	FH	1.17565	106.162
ENSG00000170743	SYT9	1.17479	3.40766
ENSG00000285043	AC093512.2	1.17225	2.85352
ENSG00000100401	RANGAP1	1.17142	102.07
ENSG00000166402	TUB	1.16913	8.91748
ENSG00000072571	HMMR	1.1664	76.4412
ENSG00000164176	EDIL3	1.16621	70.472
ENSG00000125454	SLC25A19	1.16289	12.0297
ENSG00000066651	TRMT11	1.16279	32.7003
ENSG00000077684	JADE1	1.16255	79.2995
ENSG00000138180	CEP55	1.16232	110.38
ENSG00000073008	PVR	1.16133	124.708
ENSG00000149929	HIRIP3	1.16104	26.1849
ENSG00000118596	SLC16A7	1.15947	30.0064
ENSG00000166741	NNMT	1.15927	91.0089
ENSG00000104549	SQLE	1.15644	98.8643
ENSG00000159399	HK2	1.1532	63.5562
ENSG00000154229	PRKCA	1.15313	114.614
ENSG00000116830	TTF2	1.15093	51.1761
ENSG00000111981	ULBP1	1.1486	13.2692
ENSG00000139428	MMAB	1.14821	30.0567
ENSG00000142949	PTPRF	1.14775	110.737
ENSG00000155970	MICU3	1.14715	18.0848
ENSG00000093009	CDC45	1.14515	56.8901
ENSG00000145220	LYAR	1.14366	62.6288
ENSG00000172244	C5orf34	1.14028	14.9277
ENSG00000116133	DHCR24	1.13991	79.7146
ENSG00000104884	ERCC2	1.1387	51.782
ENSG00000231767	AL136454.1	1.13853	2.79227
ENSG00000166986	MARS	1.13852	117.989
ENSG00000126860	EVI2A	1.13578	1.80142
ENSG00000024526	DEPDC1	1.13489	72.6448
ENSG00000184445	KNTC1	1.13167	66.8364
ENSG00000135312	HTR1B	1.13154	42.016
ENSG00000057019	DCBLD2	1.13153	117.292
ENSG00000122729	ACO1	1.1312	130.932
ENSG00000187840	EIF4EBP1	1.12855	53.323
ENSG00000120699	EXOSC8	1.12848	72.1344
ENSG00000166833	NAV2	1.12819	59.8625
ENSG00000152253	SPC25	1.12726	36.101
ENSG00000146530	VWDE	1.12627	2.1609
ENSG00000068489	PRR11	1.12616	100.852
ENSG00000187098	MITF	1.12606	16.7468
ENSG00000178999	AURKB	1.1243	54.6774
ENSG00000095739	BAMBI	1.12367	11.5353
ENSG00000073792	IGF2BP2	1.12318	120.508
ENSG00000174175	SELP	1.12312	11.437
ENSG00000176244	ACBD7	1.12197	5.26618
ENSG00000079459	FDFT1	1.12099	115.302
ENSG00000125746	EML2	1.11854	28.3874
ENSG00000225830	ERCC6	1.11849	84.1686
ENSG00000129810	SGO1	1.11726	30.1713
ENSG00000020577	SAMD4A	1.11668	87.8998
ENSG00000160200	CBS	1.11657	11.2363
ENSG00000249992	TMEM158	1.11571	3.05405
ENSG00000075702	WDR62	1.11561	26.8476
ENSG00000115758	ODC1	1.11288	133.176
ENSG00000134057	CCNB1	1.11279	114.077
ENSG00000196305	IARS	1.11204	148.446
ENSG00000164104	HMGB2	1.11196	128.688
ENSG00000074935	TUBE1	1.11136	41.2497
ENSG00000121152	NCAPH	1.11006	61.7545
ENSG00000164023	SGMS2	1.10859	78.2747
ENSG00000112186	CAP2	1.10776	18.555
ENSG00000198826	ARHGAP11A	1.10729	63.9942
ENSG00000067533	RRP15	1.10725	56.0826
ENSG00000007968	E2F2	1.1064	7.70917
ENSG00000184470	TXNRD2	1.10522	64.6414
ENSG00000175063	UBE2C	1.10074	64.808
ENSG00000154839	SKA1	1.09911	48.2377
ENSG00000115380	EFEMP1	1.09811	183.956
ENSG00000148773	MKI67	1.09805	91.1642
ENSG00000135451	TROAP	1.09704	35.9234
ENSG00000035499	DEPDC1B	1.09663	34.5573
ENSG00000198056	PRIM1	1.09587	17.5434
ENSG00000144320	LNPK	1.09219	33.4828
ENSG00000100479	POLE2	1.09113	25.5723
ENSG00000235162	C12orf75	1.0892	50.4404
ENSG00000149201	CCDC81	1.08888	2.24307
ENSG00000058063	ATP11B	1.08866	89.0331
ENSG00000051341	POLQ	1.08859	40.2948
ENSG00000176454	LPCAT4	1.08815	36.1764
ENSG00000163918	RFC4	1.08531	35.6473
ENSG00000156398	SFXN2	1.08428	22.1672
ENSG00000087586	AURKA	1.08389	78.0189
ENSG00000205726	ITSN1	1.08369	145.212
ENSG00000176678	FOXL1	1.08287	15.688
ENSG00000186523	FAM86B1	1.08262	5.11512
ENSG00000204767	INSYN2B	1.08187	23.3246
ENSG00000114646	CSPG5	1.08027	2.52129
ENSG00000165480	SKA3	1.07939	61.1323
ENSG00000169429	CXCL8	1.07775	71.884
ENSG00000184785	SMIM10	1.07717	6.52214
ENSG00000137807	KIF23	1.07662	96.3578
ENSG00000203760	CENPW	1.07496	21.9847
ENSG00000088325	TPX2	1.07493	137.029
ENSG00000137312	FLOT1	1.07481	83.0464
ENSG00000108106	UBE2S	1.07282	26.2444
ENSG00000121621	KIF18A	1.0725	48.1649
ENSG00000175643	RMI2	1.0702	18.7795
ENSG00000156509	FBXO43	1.06949	6.03879
ENSG00000198929	NOS1AP	1.06841	10.4097
ENSG00000008394	MGST1	1.0662	75.4679
ENSG00000203995	ZYG11A	1.06582	11.0952
ENSG00000185238	PRMT3	1.06453	41.8643
ENSG00000142731	PLK4	1.06072	60.3736
ENSG00000141198	TOM1L1	1.06018	6.60837
ENSG00000129173	E2F8	1.05622	43.4962
ENSG00000150782	IL18	1.05593	3.44531
ENSG00000270629	NBPF14	1.05592	7.81939
ENSG00000167513	CDT1	1.05589	17.241
ENSG00000133119	RFC3	1.05566	41.3137
ENSG00000139514	SLC7A1	1.05471	101.356
ENSG00000123219	CENPK	1.05406	34.7025
ENSG00000119900	OGFRL1	1.05398	61.1191
ENSG00000221968	FADS3	1.05332	50.2992
ENSG00000134684	YARS	1.05279	117.454
ENSG00000101412	E2F1	1.05239	21.0324
ENSG00000160838	LRRC71	1.05058	2.23857
ENSG00000179431	FJX1	1.05026	24.02
ENSG00000164291	ARSK	1.04962	25.621
ENSG00000170684	ZNF296	1.049	4.21276
ENSG00000185008	ROBO2	1.04708	3.39903
ENSG00000113810	SMC4	1.04525	91.3468
ENSG00000006634	DBF4	1.04467	42.6179
ENSG00000151150	ANK3	1.04222	15.7442
ENSG00000188610	FAM72B	1.04214	7.0904
ENSG00000146410	MTFR2	1.04117	15.9853
ENSG00000010278	CD9	1.04065	136.933
ENSG00000163923	RPL39L	1.03927	19.9077
ENSG00000151725	CENPU	1.03696	38.8591
ENSG00000127528	KLF2	1.03676	22.9543
ENSG00000073111	MCM2	1.03613	46.4635
ENSG00000142945	KIF2C	1.0357	62.1875
ENSG00000166851	PLK1	1.03243	42.8696
ENSG00000204516	MICB	1.03079	57.7563
ENSG00000076003	MCM6	1.02892	63.1578
ENSG00000117877	CD3EAP	1.02887	10.1249
ENSG00000205683	DPF3	1.026	20.8402
ENSG00000165732	DDX21	1.02526	101.344
ENSG00000050405	LIMA1	1.02318	103.536
ENSG00000135046	ANXA1	1.02258	103.315
ENSG00000150938	CRIM1	1.02235	117.113
ENSG00000104738	MCM4	1.02023	72.2022
ENSG00000173706	HEG1	1.02023	108.56
ENSG00000132196	HSD17B7	1.01946	12.8406
ENSG00000156970	BUB1B	1.01847	78.5728
ENSG00000106617	PRKAG2	1.01672	62.0677
ENSG00000164087	POC1A	1.01659	19.2091
ENSG00000102384	CENPI	1.01533	31.0346
ENSG00000196196	HRCT1	1.01494	5.35049
ENSG00000102554	KLF5	1.01286	7.69137
ENSG00000104728	ARHGEF10	1.01222	4.07899
ENSG00000140905	GCSH	1.01152	1.83814
ENSG00000138778	CENPE	1.00833	68.1725
ENSG00000179348	GATA2	1.0078	65.2317
ENSG00000166451	CENPN	1.00732	30.9351
ENSG00000163808	KIF15	1.00573	47.888
ENSG00000011201	ANOS1	1.00445	5.28744
ENSG00000206535	LNP1	1.00323	2.24544
ENSG00000271425	NBPF10	1.00266	3.64072
ENSG00000111665	CDCA3	1.0022	37.3948
ENSG00000169439	SDC2	1.00203	5.33333
ENSG00000145681	HAPLN1	1.00175	4.39312
ENSG00000128408	RIBC2	1.00014	1.96113

## Sheet: YAP S127A_downregulated
Ensembl gene ID	Ensembl gene	log2(YAP S127A/Ctrl)	-log10(P value)
ENSG00000141562	NARF	-1.00185	51.7274
ENSG00000135919	SERPINE2	-1.00197	8.98721
ENSG00000051128	HOMER3	-1.00327	38.558
ENSG00000087245	MMP2	-1.00399	115.691
ENSG00000129295	LRRC6	-1.00531	6.02388
ENSG00000185442	FAM174B	-1.00712	60.5333
ENSG00000177283	FZD8	-1.0082	11.7112
ENSG00000111145	ELK3	-1.00939	92.0086
ENSG00000171310	CHST11	-1.00971	43.7841
ENSG00000163132	MSX1	-1.00981	2.08095
ENSG00000110492	MDK	-1.01012	79.4255
ENSG00000183580	FBXL7	-1.01139	62.966
ENSG00000135914	HTR2B	-1.01171	2.1003
ENSG00000051620	HEBP2	-1.01238	57.1779
ENSG00000181444	ZNF467	-1.01361	15.8579
ENSG00000152284	TCF7L1	-1.014	30.7174
ENSG00000125089	SH3TC1	-1.01528	36.0377
ENSG00000133612	AGAP3	-1.01629	60.4669
ENSG00000056972	TRAF3IP2	-1.01646	30.2843
ENSG00000133874	RNF122	-1.01682	11.7913
ENSG00000187720	THSD4	-1.01713	60.5586
ENSG00000123636	BAZ2B	-1.01831	60.933
ENSG00000010810	FYN	-1.01891	95.2625
ENSG00000214562	NUTM2D	-1.02002	1.62165
ENSG00000113448	PDE4D	-1.02106	27.216
ENSG00000104290	FZD3	-1.02117	8.46001
ENSG00000156298	TSPAN7	-1.02424	8.41701
ENSG00000108947	EFNB3	-1.02509	12.4939
ENSG00000158528	PPP1R9A	-1.02602	5.6304
ENSG00000275152	CCL16	-1.02665	2.73567
ENSG00000176771	NCKAP5	-1.02731	2.4714
ENSG00000104967	NOVA2	-1.02768	59.0533
ENSG00000123933	MXD4	-1.02851	57.6972
ENSG00000115129	TP53I3	-1.03102	42.8416
ENSG00000117525	F3	-1.03127	3.49449
ENSG00000137821	LRRC49	-1.03146	19.4234
ENSG00000198794	SCAMP5	-1.03156	30.9487
ENSG00000141505	ASGR1	-1.03208	6.34283
ENSG00000100234	TIMP3	-1.03394	2.87962
ENSG00000146242	TPBG	-1.03505	27.2827
ENSG00000069020	MAST4	-1.0355	75.7041
ENSG00000133083	DCLK1	-1.03705	2.77937
ENSG00000170681	CAVIN4	-1.03736	5.15321
ENSG00000013016	EHD3	-1.03859	6.86533
ENSG00000152953	STK32B	-1.03873	17.5725
ENSG00000180573	HIST1H2AC	-1.04164	6.18015
ENSG00000258947	TUBB3	-1.04351	2.44315
ENSG00000078018	MAP2	-1.04386	36.1915
ENSG00000118473	SGIP1	-1.04415	14.2946
ENSG00000115525	ST3GAL5	-1.04421	38.3367
ENSG00000119866	BCL11A	-1.04501	2.32546
ENSG00000198513	ATL1	-1.04619	3.71806
ENSG00000185352	HS6ST3	-1.04624	2.05697
ENSG00000130653	PNPLA7	-1.04643	3.17311
ENSG00000143630	HCN3	-1.04737	3.97207
ENSG00000178150	ZNF114	-1.04788	1.99709
ENSG00000129951	PLPPR3	-1.05063	2.05014
ENSG00000100490	CDKL1	-1.05121	5.92752
ENSG00000151690	MFSD6	-1.05431	20.7501
ENSG00000111275	ALDH2	-1.05432	72.0221
ENSG00000158373	HIST1H2BD	-1.05466	1.95314
ENSG00000163513	TGFBR2	-1.05579	109.201
ENSG00000134780	DAGLA	-1.05588	13.1519
ENSG00000186105	LRRC70	-1.0561	9.62685
ENSG00000006118	TMEM132A	-1.05624	41.5523
ENSG00000141837	CACNA1A	-1.05727	1.64562
ENSG00000145819	ARHGAP26	-1.05782	39.8049
ENSG00000076555	ACACB	-1.05883	6.75199
ENSG00000090339	ICAM1	-1.05898	12.2346
ENSG00000139182	CLSTN3	-1.06089	68.7951
ENSG00000168016	TRANK1	-1.06112	30.3774
ENSG00000225828	FAM229A	-1.06127	3.92954
ENSG00000161955	TNFSF13	-1.06271	3.07723
ENSG00000141519	CCDC40	-1.06478	4.60144
ENSG00000164403	SHROOM1	-1.0652	13.3153
ENSG00000246922	UBAP1L	-1.06559	3.13838
ENSG00000066056	TIE1	-1.06578	78.2901
ENSG00000183578	TNFAIP8L3	-1.06637	45.6205
ENSG00000184916	JAG2	-1.06786	52.7034
ENSG00000147180	ZNF711	-1.06816	11.6518
ENSG00000198435	NRARP	-1.06965	17.9723
ENSG00000130508	PXDN	-1.07327	124.635
ENSG00000137841	PLCB2	-1.07327	4.42465
ENSG00000149380	P4HA3	-1.07327	50.6353
ENSG00000203722	RAET1G	-1.07485	2.12775
ENSG00000198844	ARHGEF15	-1.07579	71.6313
ENSG00000148814	LRRC27	-1.07617	15.7754
ENSG00000174718	KIAA1551	-1.07694	65.8536
ENSG00000109046	WSB1	-1.07719	84.3365
ENSG00000107099	DOCK8	-1.0775	8.28798
ENSG00000204248	COL11A2	-1.07815	2.27698
ENSG00000163219	ARHGAP25	-1.0786	3.47275
ENSG00000143387	CTSK	-1.07952	11.809
ENSG00000144560	VGLL4	-1.08004	63.0582
ENSG00000198945	L3MBTL3	-1.08135	91.4606
ENSG00000106100	NOD1	-1.08239	37.8418
ENSG00000120875	DUSP4	-1.08315	70.9794
ENSG00000137878	GCOM1	-1.08474	10.8587
ENSG00000170989	S1PR1	-1.08592	111.678
ENSG00000204442	FAM155A	-1.08674	25.9674
ENSG00000120885	CLU	-1.08684	109.745
ENSG00000165246	NLGN4Y	-1.08829	37.2202
ENSG00000004139	SARM1	-1.08964	3.42658
ENSG00000177191	B3GNT8	-1.09014	5.0584
ENSG00000235109	ZSCAN31	-1.09072	14.8917
ENSG00000177409	SAMD9L	-1.09201	47.8694
ENSG00000166046	TCP11L2	-1.09318	15.454
ENSG00000181634	TNFSF15	-1.09366	46.8443
ENSG00000152661	GJA1	-1.09371	108.965
ENSG00000167100	SAMD14	-1.09409	14.7167
ENSG00000101670	LIPG	-1.09466	36.809
ENSG00000144821	MYH15	-1.09574	2.9252
ENSG00000262576	PCDHGA4	-1.09596	5.80236
ENSG00000154639	CXADR	-1.09702	21.6748
ENSG00000167578	RAB4B	-1.09783	2.21869
ENSG00000106025	TSPAN12	-1.10006	42.9957
ENSG00000028277	POU2F2	-1.10009	10.1944
ENSG00000064989	CALCRL	-1.10011	71.824
ENSG00000148700	ADD3	-1.10014	70.6147
ENSG00000169756	LIMS1	-1.10025	58.3843
ENSG00000117122	MFAP2	-1.10042	39.1332
ENSG00000166147	FBN1	-1.10045	115.845
ENSG00000015133	CCDC88C	-1.1005	66.4766
ENSG00000134323	MYCN	-1.10091	1.81906
ENSG00000107611	CUBN	-1.10173	27.2148
ENSG00000145675	PIK3R1	-1.10251	48.5322
ENSG00000104894	CD37	-1.1034	3.70053
ENSG00000164220	F2RL2	-1.10387	46.8489
ENSG00000137968	SLC44A5	-1.10661	16.187
ENSG00000140945	CDH13	-1.10987	48.6334
ENSG00000148180	GSN	-1.11063	72.8298
ENSG00000118292	C1orf54	-1.11082	25.6832
ENSG00000159388	BTG2	-1.1113	76.6539
ENSG00000197208	SLC22A4	-1.11198	6.43199
ENSG00000168672	FAM84B	-1.11217	30.1021
ENSG00000010327	STAB1	-1.11361	53.4406
ENSG00000141579	ZNF750	-1.11479	2.05379
ENSG00000133466	C1QTNF6	-1.11535	46.8689
ENSG00000163131	CTSS	-1.11709	17.2184
ENSG00000091137	SLC26A4	-1.11746	2.1651
ENSG00000149781	FERMT3	-1.11831	43.0636
ENSG00000168758	SEMA4C	-1.11894	36.3177
ENSG00000171502	COL24A1	-1.11984	1.75538
ENSG00000165716	FAM69B	-1.12097	40.5809
ENSG00000158825	CDA	-1.12203	1.70459
ENSG00000110799	VWF	-1.12256	85.6887
ENSG00000165029	ABCA1	-1.12332	21.6441
ENSG00000167771	RCOR2	-1.12485	2.37988
ENSG00000089692	LAG3	-1.12552	2.08989
ENSG00000174514	MFSD4A	-1.12663	2.35573
ENSG00000074219	TEAD2	-1.12902	72.97
ENSG00000105519	CAPS	-1.13112	3.86685
ENSG00000104361	NIPAL2	-1.13129	11.2045
ENSG00000177294	FBXO39	-1.13182	5.49722
ENSG00000261934	PCDHGA9	-1.13207	2.93798
ENSG00000132510	KDM6B	-1.13474	46.5882
ENSG00000197077	KIAA1671	-1.13505	92.1081
ENSG00000090238	YPEL3	-1.13587	27.7896
ENSG00000049769	PPP1R3F	-1.13768	4.3738
ENSG00000196693	ZNF33B	-1.14012	40.3771
ENSG00000173890	GPR160	-1.14075	7.56412
ENSG00000138678	GPAT3	-1.14377	13.6497
ENSG00000092068	SLC7A8	-1.1444	16.1376
ENSG00000176435	CLEC14A	-1.14588	134.919
ENSG00000146859	TMEM140	-1.14616	24.3725
ENSG00000196562	SULF2	-1.14745	86.4134
ENSG00000106070	GRB10	-1.14749	123.691
ENSG00000130158	DOCK6	-1.14849	66.9164
ENSG00000108679	LGALS3BP	-1.15135	1.76698
ENSG00000171533	MAP6	-1.15272	3.96562
ENSG00000197093	GAL3ST4	-1.15293	10.1511
ENSG00000163380	LMOD3	-1.15806	1.69502
ENSG00000127863	TNFRSF19	-1.15843	4.51002
ENSG00000106714	CNTNAP3	-1.15874	40.795
ENSG00000156711	MAPK13	-1.16027	9.81277
ENSG00000148935	GAS2	-1.16138	3.76337
ENSG00000047346	FAM214A	-1.1645	67.1579
ENSG00000011105	TSPAN9	-1.16656	77.2874
ENSG00000138172	CALHM2	-1.16656	32.3036
ENSG00000197321	SVIL	-1.16982	111.625
ENSG00000101842	VSIG1	-1.17002	5.09437
ENSG00000165434	PGM2L1	-1.17154	75.2524
ENSG00000203780	FANK1	-1.17182	6.857
ENSG00000086300	SNX10	-1.17283	3.00743
ENSG00000158887	MPZ	-1.17386	6.49376
ENSG00000185070	FLRT2	-1.17782	97.7127
ENSG00000168939	SPRY3	-1.17865	13.4373
ENSG00000004399	PLXND1	-1.17872	117.553
ENSG00000173598	NUDT4	-1.1788	67.8703
ENSG00000163590	PPM1L	-1.18054	11.9845
ENSG00000117461	PIK3R3	-1.1813	41.4201
ENSG00000075826	SEC31B	-1.18206	30.2893
ENSG00000102934	PLLP	-1.18315	8.8419
ENSG00000166387	PPFIBP2	-1.18359	6.48499
ENSG00000176907	TCIM	-1.18459	19.1256
ENSG00000137507	LRRC32	-1.1849	72.1859
ENSG00000136378	ADAMTS7	-1.18508	49.9273
ENSG00000112182	BACH2	-1.18524	5.66184
ENSG00000085465	OVGP1	-1.1856	2.79147
ENSG00000072786	STK10	-1.18668	72.511
ENSG00000152402	GUCY1A2	-1.18849	5.53304
ENSG00000110002	VWA5A	-1.18861	54.266
ENSG00000156453	PCDH1	-1.18896	95.1466
ENSG00000276409	CCL14	-1.19014	6.07947
ENSG00000105642	KCNN1	-1.19064	2.67437
ENSG00000128567	PODXL	-1.19372	132
ENSG00000196411	EPHB4	-1.19544	88.8455
ENSG00000164850	GPER1	-1.19666	6.93815
ENSG00000167772	ANGPTL4	-1.19916	30.1018
ENSG00000175779	C15orf53	-1.19975	2.68649
ENSG00000109265	KIAA1211	-1.19988	33.9448
ENSG00000181031	RPH3AL	-1.20062	9.87803
ENSG00000088882	CPXM1	-1.20175	9.54778
ENSG00000174370	C11orf45	-1.20345	3.68016
ENSG00000023902	PLEKHO1	-1.2037	60.3618
ENSG00000128203	ASPHD2	-1.20596	16.5972
ENSG00000104951	IL4I1	-1.20665	3.34932
ENSG00000160325	CACFD1	-1.20677	12.6422
ENSG00000081853	PCDHGA2	-1.20689	4.20722
ENSG00000182179	UBA7	-1.20807	41.9121
ENSG00000285816	AP000944.2	-1.2107	2.27968
ENSG00000107731	UNC5B	-1.21071	9.36505
ENSG00000175938	ORAI3	-1.21209	12.8283
ENSG00000081189	MEF2C	-1.21324	84.5146
ENSG00000085831	TTC39A	-1.21504	5.86556
ENSG00000101115	SALL4	-1.21523	2.61307
ENSG00000196407	THEM5	-1.21541	2.48711
ENSG00000107443	CCNJ	-1.21611	67.1407
ENSG00000169926	KLF13	-1.21626	60.5199
ENSG00000026103	FAS	-1.21764	18.5348
ENSG00000197872	FAM49A	-1.21902	98.3507
ENSG00000131398	KCNC3	-1.21922	4.57535
ENSG00000140931	CMTM3	-1.22075	69.2581
ENSG00000185215	TNFAIP2	-1.22088	24.793
ENSG00000133639	BTG1	-1.22149	73.0308
ENSG00000168916	ZNF608	-1.22493	59.7204
ENSG00000143341	HMCN1	-1.22501	37.0469
ENSG00000105204	DYRK1B	-1.2254	38.3492
ENSG00000068615	REEP1	-1.22577	3.57892
ENSG00000006451	RALA	-1.22638	99.3955
ENSG00000161791	FMNL3	-1.22745	117.085
ENSG00000140557	ST8SIA2	-1.22938	3.37263
ENSG00000271447	MMP28	-1.2296	3.52396
ENSG00000168918	INPP5D	-1.22972	78.0192
ENSG00000196338	NLGN3	-1.23038	2.23135
ENSG00000126950	TMEM35A	-1.23045	19.4598
ENSG00000177076	ACER2	-1.23219	14.2079
ENSG00000164342	TLR3	-1.23311	18.4295
ENSG00000125945	ZNF436	-1.23417	60.3274
ENSG00000183638	RP1L1	-1.23533	4.87673
ENSG00000129675	ARHGEF6	-1.2354	31.5138
ENSG00000072201	LNX1	-1.23855	8.6725
ENSG00000256061	DNAAF4	-1.2391	3.05123
ENSG00000165895	ARHGAP42	-1.23916	15.1842
ENSG00000101850	GPR143	-1.24183	20.7203
ENSG00000171680	PLEKHG5	-1.24641	66.204
ENSG00000119938	PPP1R3C	-1.24822	9.60466
ENSG00000166341	DCHS1	-1.24893	90.7564
ENSG00000143878	RHOB	-1.25009	164.276
ENSG00000019991	HGF	-1.2503	2.42666
ENSG00000187942	LDLRAD2	-1.25193	5.98421
ENSG00000146950	SHROOM2	-1.25299	76.9965
ENSG00000187498	COL4A1	-1.25458	192.204
ENSG00000213420	GPC2	-1.25689	9.05925
ENSG00000142798	HSPG2	-1.25854	14.675
ENSG00000198753	PLXNB3	-1.25937	35.586
ENSG00000164604	GPR85	-1.25977	2.57318
ENSG00000168646	AXIN2	-1.25992	8.053
ENSG00000136383	ALPK3	-1.25997	67.4348
ENSG00000129757	CDKN1C	-1.26032	3.33591
ENSG00000148400	NOTCH1	-1.26124	75.5382
ENSG00000118407	FILIP1	-1.26176	6.83908
ENSG00000078804	TP53INP2	-1.26225	101.265
ENSG00000103490	PYCARD	-1.26375	7.85552
ENSG00000225968	ELFN1	-1.26449	5.3888
ENSG00000147174	GCNA	-1.26731	6.08131
ENSG00000089127	OAS1	-1.26946	27.2279
ENSG00000165152	TMEM246	-1.26996	5.25195
ENSG00000182118	FAM89A	-1.27049	11.7927
ENSG00000120594	PLXDC2	-1.27213	2.72418
ENSG00000140511	HAPLN3	-1.27382	30.4536
ENSG00000130052	STARD8	-1.27491	39.6438
ENSG00000099953	MMP11	-1.27638	17.3656
ENSG00000154016	GRAP	-1.2785	5.74081
ENSG00000102048	ASB9	-1.27855	14.1112
ENSG00000128594	LRRC4	-1.27922	11.7005
ENSG00000182541	LIMK2	-1.27941	108.841
ENSG00000243364	EFNA4	-1.27963	27.125
ENSG00000008513	ST3GAL1	-1.2798	120.257
ENSG00000114796	KLHL24	-1.28012	58.3833
ENSG00000173482	PTPRM	-1.28081	95.8553
ENSG00000171105	INSR	-1.28125	41.7272
ENSG00000107957	SH3PXD2A	-1.28282	56.0217
ENSG00000158859	ADAMTS4	-1.28295	64.0833
ENSG00000163346	PBXIP1	-1.2837	97.9744
ENSG00000213462	ERV3-1	-1.28441	59.2889
ENSG00000091844	RGS17	-1.2845	14.5643
ENSG00000114654	EFCC1	-1.28469	1.89834
ENSG00000253873	PCDHGA11	-1.28754	33.15
ENSG00000172348	RCAN2	-1.28755	3.60661
ENSG00000185909	KLHDC8B	-1.28825	37.6507
ENSG00000205502	C2CD4B	-1.28846	3.57072
ENSG00000114812	VIPR1	-1.28872	6.22191
ENSG00000183018	SPNS2	-1.28946	34.3344
ENSG00000019549	SNAI2	-1.29081	1.77326
ENSG00000187944	C2orf66	-1.29271	2.66665
ENSG00000170748	RBMXL2	-1.29713	3.1293
ENSG00000116396	KCNC4	-1.29765	51.5589
ENSG00000111834	RSPH4A	-1.298	1.80436
ENSG00000147119	CHST7	-1.3003	19.1923
ENSG00000165757	JCAD	-1.3015	121.25
ENSG00000135636	DYSF	-1.3017	99.2041
ENSG00000160111	CPAMD8	-1.30226	6.90305
ENSG00000154262	ABCA6	-1.30262	55.2259
ENSG00000158769	F11R	-1.30292	116.093
ENSG00000141338	ABCA8	-1.30468	87.8013
ENSG00000141655	TNFRSF11A	-1.30994	38.9936
ENSG00000057657	PRDM1	-1.31092	8.22484
ENSG00000185339	TCN2	-1.31097	125.164
ENSG00000137509	PRCP	-1.313	167.636
ENSG00000135678	CPM	-1.31652	4.02725
ENSG00000163637	PRICKLE2	-1.31699	26.7594
ENSG00000196074	SYCP2	-1.31783	3.60342
ENSG00000114115	RBP1	-1.31929	3.98378
ENSG00000108984	MAP2K6	-1.3193	27.7474
ENSG00000196358	NTNG2	-1.32201	1.72626
ENSG00000154118	JPH3	-1.32212	5.16028
ENSG00000196782	MAML3	-1.32238	76.5967
ENSG00000196169	KIF19	-1.32488	3.56982
ENSG00000167984	NLRC3	-1.32765	6.18801
ENSG00000173200	PARP15	-1.32807	4.89125
ENSG00000162654	GBP4	-1.32823	23.759
ENSG00000146197	SCUBE3	-1.32997	13.2859
ENSG00000071575	TRIB2	-1.33087	39.0661
ENSG00000139946	PELI2	-1.33155	39.7848
ENSG00000162849	KIF26B	-1.33165	1.99195
ENSG00000188559	RALGAPA2	-1.33194	102.003
ENSG00000156535	CD109	-1.33546	128.283
ENSG00000168314	MOBP	-1.33629	3.18273
ENSG00000151117	TMEM86A	-1.33789	7.10842
ENSG00000171227	TMEM37	-1.33849	16.8804
ENSG00000274750	HIST1H3E	-1.33851	8.34098
ENSG00000118257	NRP2	-1.3392	205.174
ENSG00000111886	GABRR2	-1.34029	2.22207
ENSG00000158813	EDA	-1.34162	5.92801
ENSG00000129596	CDO1	-1.345	7.60501
ENSG00000134070	IRAK2	-1.34531	48.8663
ENSG00000103034	NDRG4	-1.34741	67.8488
ENSG00000101017	CD40	-1.35141	36.1145
ENSG00000176809	LRRC37A3	-1.35573	13.1467
ENSG00000152926	ZNF117	-1.35728	105.385
ENSG00000143772	ITPKB	-1.35896	84.9377
ENSG00000162511	LAPTM5	-1.35913	118.088
ENSG00000139508	SLC46A3	-1.365	28.6965
ENSG00000099204	ABLIM1	-1.36556	148.32
ENSG00000144214	LYG1	-1.36602	1.6174
ENSG00000198795	ZNF521	-1.36848	133.903
ENSG00000105639	JAK3	-1.37225	3.93376
ENSG00000104763	ASAH1	-1.37383	34.0298
ENSG00000023171	GRAMD1B	-1.37396	23.4634
ENSG00000095370	SH2D3C	-1.37736	72.6179
ENSG00000185527	PDE6G	-1.37753	3.17436
ENSG00000164736	SOX17	-1.37805	26.288
ENSG00000162415	ZSWIM5	-1.37813	9.76697
ENSG00000132530	XAF1	-1.37834	8.81219
ENSG00000188158	NHS	-1.37844	1.86741
ENSG00000170835	CEL	-1.37969	2.88822
ENSG00000173894	CBX2	-1.38001	43.2665
ENSG00000103044	HAS3	-1.38049	7.82612
ENSG00000068001	HYAL2	-1.38097	99.3079
ENSG00000111335	OAS2	-1.38102	25.0488
ENSG00000154025	SLC5A10	-1.38174	2.12152
ENSG00000093072	ADA2	-1.38196	7.13877
ENSG00000174130	TLR6	-1.38692	21.9535
ENSG00000137809	ITGA11	-1.38797	10.8672
ENSG00000112852	PCDHB2	-1.38874	3.1725
ENSG00000205403	CFI	-1.39058	23.599
ENSG00000155849	ELMO1	-1.39234	93.0922
ENSG00000172602	RND1	-1.39548	7.182
ENSG00000099282	TSPAN15	-1.39561	79.5735
ENSG00000265972	TXNIP	-1.39574	100.11
ENSG00000154721	JAM2	-1.39962	2.36773
ENSG00000257108	NHLRC4	-1.40307	2.34675
ENSG00000160712	IL6R	-1.4032	31.2591
ENSG00000183615	FAM167B	-1.40552	2.44611
ENSG00000154162	CDH12	-1.40681	6.983
ENSG00000126785	RHOJ	-1.40725	234.443
ENSG00000149212	SESN3	-1.40897	54.4687
ENSG00000075275	CELSR1	-1.41032	9.15102
ENSG00000178718	RPP25	-1.41575	67.1623
ENSG00000148123	PLPPR1	-1.41664	14.3494
ENSG00000196628	TCF4	-1.41667	194.963
ENSG00000146409	SLC18B1	-1.41677	35.3897
ENSG00000163762	TM4SF18	-1.41713	102.061
ENSG00000182568	SATB1	-1.41738	33.1471
ENSG00000011523	CEP68	-1.41935	95.9481
ENSG00000184588	PDE4B	-1.41974	164.551
ENSG00000137486	ARRB1	-1.41988	96.4182
ENSG00000254245	PCDHGA3	-1.42027	2.8021
ENSG00000151136	BTBD11	-1.42074	3.34587
ENSG00000227051	C14orf132	-1.42137	17.9236
ENSG00000128641	MYO1B	-1.42147	139.219
ENSG00000154258	ABCA9	-1.42511	14.3052
ENSG00000150636	CCDC102B	-1.42522	5.97556
ENSG00000109458	GAB1	-1.42726	66.5059
ENSG00000085117	CD82	-1.43102	47.6342
ENSG00000005187	ACSM3	-1.43134	22.5144
ENSG00000163171	CDC42EP3	-1.43137	163.174
ENSG00000187796	CARD9	-1.43441	2.55665
ENSG00000162944	RFTN2	-1.43578	37.9363
ENSG00000114315	HES1	-1.43916	66.1765
ENSG00000175048	ZDHHC14	-1.44054	68.4622
ENSG00000213626	LBH	-1.4498	5.25882
ENSG00000129646	QRICH2	-1.45015	10.5818
ENSG00000205129	C4orf47	-1.45024	2.09975
ENSG00000144339	TMEFF2	-1.45057	2.54062
ENSG00000102802	MEDAG	-1.45109	37.0101
ENSG00000254087	LYN	-1.45194	116.641
ENSG00000115252	PDE1A	-1.45452	4.38624
ENSG00000188070	C11orf95	-1.45494	94.0214
ENSG00000133800	LYVE1	-1.45608	98.6141
ENSG00000185630	PBX1	-1.45619	48.8007
ENSG00000174348	PODN	-1.45895	3.56521
ENSG00000163638	ADAMTS9	-1.4613	197.287
ENSG00000120328	PCDHB12	-1.46248	2.02698
ENSG00000168675	LDLRAD4	-1.46257	8.43971
ENSG00000102755	FLT1	-1.46308	185.086
ENSG00000117707	PROX1	-1.46328	32.1723
ENSG00000175130	MARCKSL1	-1.46396	173.526
ENSG00000147113	CXorf36	-1.47004	186.204
ENSG00000146469	VIP	-1.47052	3.04027
ENSG00000197385	ZNF860	-1.47059	11.6764
ENSG00000187556	NANOS3	-1.47101	1.65338
ENSG00000004468	CD38	-1.47104	2.43607
ENSG00000094755	GABRP	-1.47498	2.69597
ENSG00000167992	VWCE	-1.47509	10.8319
ENSG00000160179	ABCG1	-1.47627	41.3034
ENSG00000066735	KIF26A	-1.47636	25.2595
ENSG00000136732	GYPC	-1.47674	8.91314
ENSG00000108342	CSF3	-1.47721	5.30247
ENSG00000127920	GNG11	-1.47743	126.239
ENSG00000280537	AC068946.1	-1.48101	2.36575
ENSG00000154930	ACSS1	-1.48141	17.2969
ENSG00000109501	WFS1	-1.48369	107.394
ENSG00000068831	RASGRP2	-1.48438	3.63174
ENSG00000175274	TP53I11	-1.48583	136.924
ENSG00000163947	ARHGEF3	-1.48654	101.279
ENSG00000169291	SHE	-1.48685	181.425
ENSG00000171496	OR1L8	-1.48688	4.18876
ENSG00000136490	LIMD2	-1.48798	40.7083
ENSG00000129538	RNASE1	-1.49102	124.748
ENSG00000154928	EPHB1	-1.49106	2.37546
ENSG00000251322	SHANK3	-1.49122	83.1898
ENSG00000171729	TMEM51	-1.49276	42.7935
ENSG00000183111	ARHGEF37	-1.50027	44.5559
ENSG00000204131	NHSL2	-1.50031	142.244
ENSG00000146094	DOK3	-1.50075	10.9731
ENSG00000164938	TP53INP1	-1.50236	137.272
ENSG00000136161	RCBTB2	-1.50368	49.2936
ENSG00000164867	NOS3	-1.50516	97.8107
ENSG00000173269	MMRN2	-1.50799	228.316
ENSG00000138449	SLC40A1	-1.50952	97.3736
ENSG00000196468	FGF16	-1.50989	18.3068
ENSG00000157510	AFAP1L1	-1.51053	148.353
ENSG00000137266	SLC22A23	-1.5116	45.2115
ENSG00000111052	LIN7A	-1.51213	19.9021
ENSG00000152760	TCTEX1D1	-1.51599	19.4145
ENSG00000135299	ANKRD6	-1.51748	15.5826
ENSG00000158077	NLRP14	-1.51898	7.58023
ENSG00000155530	LRGUK	-1.5259	1.56746
ENSG00000165091	TMC1	-1.53072	2.3906
ENSG00000196611	MMP1	-1.53251	0
ENSG00000126759	CFP	-1.5371	4.07225
ENSG00000166265	CYYR1	-1.53834	74.7823
ENSG00000170271	FAXDC2	-1.5392	28.2876
ENSG00000124140	SLC12A5	-1.54036	2.23753
ENSG00000136630	HLX	-1.54106	18.2619
ENSG00000189184	PCDH18	-1.54143	13.6787
ENSG00000100100	PIK3IP1	-1.54364	29.0454
ENSG00000177374	HIC1	-1.54473	56.6822
ENSG00000110852	CLEC2B	-1.54617	20.8876
ENSG00000115008	IL1A	-1.54625	7.63639
ENSG00000183307	TMEM121B	-1.54648	4.00694
ENSG00000203727	SAMD5	-1.54868	78.1341
ENSG00000110900	TSPAN11	-1.54961	32.0523
ENSG00000107551	RASSF4	-1.55076	69.0447
ENSG00000102935	ZNF423	-1.55162	16.2335
ENSG00000125266	EFNB2	-1.55376	102.628
ENSG00000072952	MRVI1	-1.55393	8.11855
ENSG00000128833	MYO5C	-1.55624	53.2693
ENSG00000204381	LAYN	-1.56254	4.01611
ENSG00000185291	IL3RA	-1.56274	15.1294
ENSG00000065534	MYLK	-1.56281	53.1882
ENSG00000129467	ADCY4	-1.56283	90.8778
ENSG00000197142	ACSL5	-1.56667	25.7651
ENSG00000124766	SOX4	-1.56724	147.819
ENSG00000198732	SMOC1	-1.57019	5.63152
ENSG00000138435	CHRNA1	-1.57388	17.5867
ENSG00000156049	GNA14	-1.5767	17.0215
ENSG00000157873	TNFRSF14	-1.57897	35.5659
ENSG00000115828	QPCT	-1.5811	51.4727
ENSG00000008283	CYB561	-1.58164	81.4122
ENSG00000106688	SLC1A1	-1.58468	139.438
ENSG00000240583	AQP1	-1.58494	25.4763
ENSG00000105246	EBI3	-1.58814	2.167
ENSG00000146021	KLHL3	-1.58889	92.0663
ENSG00000253537	PCDHGA7	-1.58994	5.84839
ENSG00000215788	TNFRSF25	-1.59066	33.4185
ENSG00000120549	KIAA1217	-1.59227	13.6117
ENSG00000164932	CTHRC1	-1.59459	30.8347
ENSG00000122644	ARL4A	-1.59637	63.0186
ENSG00000213203	GIMAP1	-1.59719	59.9578
ENSG00000175899	A2M	-1.59896	9.51492
ENSG00000128872	TMOD2	-1.60087	16.1486
ENSG00000063127	SLC6A16	-1.60135	5.35735
ENSG00000185737	NRG3	-1.60545	42.7835
ENSG00000149256	TENM4	-1.60549	5.37945
ENSG00000091428	RAPGEF4	-1.60576	40.4432
ENSG00000162407	PLPP3	-1.60631	91.243
ENSG00000136960	ENPP2	-1.60666	3.11266
ENSG00000143127	ITGA10	-1.60699	109.496
ENSG00000164056	SPRY1	-1.60719	16.9684
ENSG00000160271	RALGDS	-1.60757	31.1453
ENSG00000102996	MMP15	-1.60761	59.3583
ENSG00000164125	FAM198B	-1.60796	150.104
ENSG00000169122	FAM110B	-1.60859	2.97815
ENSG00000087237	CETP	-1.61084	10.5963
ENSG00000158856	DMTN	-1.61217	55.5272
ENSG00000174502	SLC26A9	-1.61541	1.60785
ENSG00000170873	MTSS1	-1.61569	150.878
ENSG00000253731	PCDHGA6	-1.61663	13.7965
ENSG00000166257	SCN3B	-1.61884	12.2201
ENSG00000151276	MAGI1	-1.62124	138.764
ENSG00000091879	ANGPT2	-1.62131	178.057
ENSG00000143344	RGL1	-1.62375	180.321
ENSG00000140009	ESR2	-1.62738	2.30147
ENSG00000085871	MGST2	-1.628	93.2001
ENSG00000133710	SPINK5	-1.6284	14.7533
ENSG00000169242	EFNA1	-1.62868	77.6503
ENSG00000163701	IL17RE	-1.62891	2.26289
ENSG00000198355	PIM3	-1.63043	120.715
ENSG00000065618	COL17A1	-1.6307	5.45235
ENSG00000128284	APOL3	-1.63585	69.6604
ENSG00000180730	SHISA2	-1.63602	15.1435
ENSG00000011347	SYT7	-1.63854	2.18532
ENSG00000151388	ADAMTS12	-1.6424	1.80142
ENSG00000126882	FAM78A	-1.6448	122.126
ENSG00000164035	EMCN	-1.64489	159.664
ENSG00000106560	GIMAP2	-1.64686	79.9152
ENSG00000198075	SULT1C4	-1.64793	40.2594
ENSG00000272636	DOC2B	-1.65233	1.70764
ENSG00000120324	PCDHB10	-1.65368	3.25811
ENSG00000141753	IGFBP4	-1.6572	260.559
ENSG00000183496	MEX3B	-1.65899	45.5165
ENSG00000139970	RTN1	-1.66104	2.69895
ENSG00000037280	FLT4	-1.66421	90.8779
ENSG00000160145	KALRN	-1.66461	73.9042
ENSG00000086205	FOLH1	-1.66472	1.9564
ENSG00000047617	ANO2	-1.66622	21.7554
ENSG00000162643	WDR63	-1.6676	1.75777
ENSG00000187513	GJA4	-1.66806	35.3196
ENSG00000057704	TMCC3	-1.67445	171.294
ENSG00000135063	FAM189A2	-1.68235	6.26285
ENSG00000175874	CREG2	-1.68406	16.7978
ENSG00000124406	ATP8A1	-1.68409	14.4304
ENSG00000133321	RARRES3	-1.68659	3.44764
ENSG00000131477	RAMP2	-1.68894	12.4606
ENSG00000073849	ST6GAL1	-1.69019	296.542
ENSG00000179981	TSHZ1	-1.69022	108.844
ENSG00000143434	SEMA6C	-1.69318	73.7007
ENSG00000177685	CRACR2B	-1.69685	13.0995
ENSG00000139329	LUM	-1.69717	14.2991
ENSG00000090776	EFNB1	-1.69919	107.399
ENSG00000172578	KLHL6	-1.69921	93.432
ENSG00000184497	TMEM255B	-1.70192	89.3888
ENSG00000272674	PCDHB16	-1.70625	2.77707
ENSG00000158458	NRG2	-1.70777	3.15663
ENSG00000196460	RFX8	-1.7096	3.19049
ENSG00000164683	HEY1	-1.71089	15.6591
ENSG00000106852	LHX6	-1.71726	11.1537
ENSG00000143554	SLC27A3	-1.72057	41.1265
ENSG00000059377	TBXAS1	-1.72207	6.93168
ENSG00000155093	PTPRN2	-1.72322	10.7808
ENSG00000119630	PGF	-1.72417	181.982
ENSG00000173535	TNFRSF10C	-1.72766	112.134
ENSG00000187134	AKR1C1	-1.72793	5.98181
ENSG00000111962	UST	-1.72881	6.69044
ENSG00000204385	SLC44A4	-1.73027	4.74365
ENSG00000151692	RNF144A	-1.73202	84.1399
ENSG00000165194	PCDH19	-1.73209	16.2425
ENSG00000101096	NFATC2	-1.73436	106.527
ENSG00000158555	GDPD5	-1.73819	81.3355
ENSG00000137673	MMP7	-1.74323	3.3597
ENSG00000138378	STAT4	-1.74583	3.49659
ENSG00000035664	DAPK2	-1.74835	8.27356
ENSG00000159167	STC1	-1.75516	41.1809
ENSG00000136859	ANGPTL2	-1.7573	119.311
ENSG00000253305	PCDHGB6	-1.75768	10.3505
ENSG00000198719	DLL1	-1.76073	15.5391
ENSG00000170537	TMC7	-1.76169	27.0528
ENSG00000038945	MSR1	-1.76852	2.81967
ENSG00000196139	AKR1C3	-1.78018	35.0883
ENSG00000181804	SLC9A9	-1.78114	14.3342
ENSG00000181885	CLDN7	-1.78648	36.3111
ENSG00000135218	CD36	-1.78716	13.3252
ENSG00000188993	LRRC66	-1.78888	3.82634
ENSG00000167861	HID1	-1.79246	110.837
ENSG00000159640	ACE	-1.79384	82.5626
ENSG00000197261	C6orf141	-1.79414	12.0586
ENSG00000121966	CXCR4	-1.79489	143.138
ENSG00000005108	THSD7A	-1.79602	100.406
ENSG00000174600	CMKLR1	-1.79983	2.25953
ENSG00000261371	PECAM1	-1.80174	0
ENSG00000205085	FAM71F2	-1.81336	3.28203
ENSG00000113248	PCDHB15	-1.81516	6.31135
ENSG00000159314	ARHGAP27	-1.81519	86.2738
ENSG00000224982	TMEM233	-1.81589	5.5129
ENSG00000162490	DRAXIN	-1.81768	17.4559
ENSG00000188897	AC099489.1	-1.81987	4.20536
ENSG00000088756	ARHGAP28	-1.82193	112.161
ENSG00000127152	BCL11B	-1.822	2.77002
ENSG00000170962	PDGFD	-1.82314	61.7968
ENSG00000133056	PIK3C2B	-1.82958	143.77
ENSG00000144476	ACKR3	-1.83031	46.0988
ENSG00000153885	KCTD15	-1.83571	130.165
ENSG00000185477	GPRIN3	-1.84767	29.586
ENSG00000164687	FABP5	-1.84983	137.902
ENSG00000174004	NRROS	-1.85059	30.5423
ENSG00000169432	SCN9A	-1.85667	36.5027
ENSG00000157404	KIT	-1.85744	141.785
ENSG00000124772	CPNE5	-1.86112	34.4429
ENSG00000183346	CABCOCO1	-1.86207	5.57713
ENSG00000178695	KCTD12	-1.86589	180.578
ENSG00000186377	CYP4X1	-1.86651	4.65902
ENSG00000091972	CD200	-1.86893	62.5261
ENSG00000161940	BCL6B	-1.87707	283.645
ENSG00000002587	HS3ST1	-1.87909	6.47463
ENSG00000181652	ATG9B	-1.87976	12.1406
ENSG00000182575	NXPH3	-1.88171	6.73345
ENSG00000074211	PPP2R2C	-1.88771	2.39269
ENSG00000180884	ZNF792	-1.88835	84.813
ENSG00000163083	INHBB	-1.8951	10.3053
ENSG00000121797	CCRL2	-1.8955	32.8115
ENSG00000150540	HNMT	-1.89742	49.5237
ENSG00000162645	GBP2	-1.89946	188.914
ENSG00000196209	SIRPB2	-1.90296	29.6504
ENSG00000114200	BCHE	-1.9035	46.1906
ENSG00000186994	KANK3	-1.90515	38.7621
ENSG00000196932	TMEM26	-1.90562	4.2468
ENSG00000187372	PCDHB13	-1.90821	10.6916
ENSG00000171860	C3AR1	-1.90857	5.83243
ENSG00000106537	TSPAN13	-1.91059	76.0801
ENSG00000164116	GUCY1A1	-1.91125	2.91587
ENSG00000165071	TMEM71	-1.91173	34.0936
ENSG00000140678	ITGAX	-1.91199	5.38055
ENSG00000178175	ZNF366	-1.92045	19.3246
ENSG00000262209	PCDHGB3	-1.92164	4.86369
ENSG00000087303	NID2	-1.9333	154.073
ENSG00000155465	SLC7A7	-1.93482	56.1851
ENSG00000141431	ASXL3	-1.93502	5.87795
ENSG00000154864	PIEZO2	-1.93542	234.326
ENSG00000178947	SMIM10L2A	-1.93828	5.51153
ENSG00000184574	LPAR5	-1.94461	2.19253
ENSG00000101695	RNF125	-1.94475	23.7176
ENSG00000135324	MRAP2	-1.95865	50.9177
ENSG00000008517	IL32	-1.96605	41.4789
ENSG00000069122	ADGRF5	-1.9714	204.007
ENSG00000226979	LTA	-1.97891	2.99
ENSG00000178538	CA8	-1.98266	19.627
ENSG00000163491	NEK10	-1.98478	20.8054
ENSG00000253846	PCDHGA10	-1.9852	19.475
ENSG00000255690	TRIL	-1.98591	4.16755
ENSG00000135074	ADAM19	-1.99314	221.335
ENSG00000151322	NPAS3	-1.99519	2.27564
ENSG00000204956	PCDHGA1	-1.99555	3.37357
ENSG00000168961	LGALS9	-2.00177	53.5868
ENSG00000169860	P2RY1	-2.00507	11.2063
ENSG00000120327	PCDHB14	-2.00984	10.3289
ENSG00000185614	INKA1	-2.01022	18.0662
ENSG00000196421	C20orf204	-2.01109	14.191
ENSG00000159307	SCUBE1	-2.01438	14.4338
ENSG00000185585	OLFML2A	-2.01597	6.92974
ENSG00000108551	RASD1	-2.0182	12.4932
ENSG00000153822	KCNJ16	-2.02077	4.16754
ENSG00000143603	KCNN3	-2.02235	31.6013
ENSG00000133574	GIMAP4	-2.0225	0
ENSG00000155324	GRAMD2B	-2.02965	3.40862
ENSG00000101265	RASSF2	-2.03097	246.84
ENSG00000103528	SYT17	-2.03528	6.49773
ENSG00000125810	CD93	-2.03721	0
ENSG00000203883	SOX18	-2.03858	32.5251
ENSG00000130307	USHBP1	-2.04611	26.4048
ENSG00000133805	AMPD3	-2.04794	14.5845
ENSG00000189058	APOD	-2.05083	17.0464
ENSG00000152217	SETBP1	-2.063	50.6734
ENSG00000155962	CLIC2	-2.07243	23.8015
ENSG00000169413	RNASE6	-2.07465	4.2771
ENSG00000235750	KIAA0040	-2.08127	169.883
ENSG00000092421	SEMA6A	-2.08291	35.1165
ENSG00000113209	PCDHB5	-2.08916	5.35398
ENSG00000171236	LRG1	-2.08999	2.93248
ENSG00000165507	DEPP1	-2.09253	0
ENSG00000071246	VASH1	-2.0968	292.66
ENSG00000198336	MYL4	-2.09764	5.26761
ENSG00000175264	CHST1	-2.09788	123.908
ENSG00000081237	PTPRC	-2.10704	4.57148
ENSG00000128052	KDR	-2.10889	0
ENSG00000125878	TCF15	-2.11413	6.29462
ENSG00000157551	KCNJ15	-2.12616	9.9261
ENSG00000143816	WNT9A	-2.13078	22.523
ENSG00000135362	PRR5L	-2.13599	26.1542
ENSG00000139679	LPAR6	-2.14763	143.6
ENSG00000133561	GIMAP6	-2.15073	0
ENSG00000145794	MEGF10	-2.15654	4.19586
ENSG00000173801	JUP	-2.15711	262.457
ENSG00000064042	LIMCH1	-2.1584	127.573
ENSG00000172159	FRMD3	-2.16221	20.6896
ENSG00000100336	APOL4	-2.17741	7.07625
ENSG00000004799	PDK4	-2.18098	65.9994
ENSG00000243232	PCDHAC2	-2.18108	18.6814
ENSG00000131634	TMEM204	-2.1834	33.5378
ENSG00000146006	LRRTM2	-2.18527	6.80722
ENSG00000069812	HES2	-2.18791	70.563
ENSG00000136160	EDNRB	-2.1899	47.3558
ENSG00000064692	SNCAIP	-2.19585	54.9163
ENSG00000169248	CXCL11	-2.19758	24.5746
ENSG00000142405	NLRP12	-2.1982	4.35848
ENSG00000158869	FCER1G	-2.20048	3.57837
ENSG00000169247	SH3TC2	-2.21793	32.9311
ENSG00000135643	KCNMB4	-2.22687	21.0571
ENSG00000166670	MMP10	-2.2296	106.242
ENSG00000164929	BAALC	-2.23285	7.64555
ENSG00000197245	FAM110D	-2.23802	6.31147
ENSG00000163554	SPTA1	-2.24191	9.12621
ENSG00000130300	PLVAP	-2.24586	18.5832
ENSG00000121858	TNFSF10	-2.24662	144.224
ENSG00000186479	RGS7BP	-2.25711	94.2573
ENSG00000204301	NOTCH4	-2.25766	154.144
ENSG00000113532	ST8SIA4	-2.25847	87.9835
ENSG00000127533	F2RL3	-2.25888	14.1801
ENSG00000164440	TXLNB	-2.25967	4.00533
ENSG00000169744	LDB2	-2.2662	282.014
ENSG00000276644	DACH1	-2.28049	108.672
ENSG00000153094	BCL2L11	-2.28387	63.7942
ENSG00000124019	FAM124B	-2.28823	267.437
ENSG00000135363	LMO2	-2.2907	157.493
ENSG00000145911	N4BP3	-2.29405	125.351
ENSG00000179144	GIMAP7	-2.3031	193.538
ENSG00000116574	RHOU	-2.30567	7.3302
ENSG00000138185	ENTPD1	-2.31053	128.089
ENSG00000186469	GNG2	-2.31149	25.3981
ENSG00000172031	EPHX4	-2.32459	34.892
ENSG00000139187	KLRG1	-2.3274	30.768
ENSG00000107719	PALD1	-2.33117	147.159
ENSG00000266094	RASSF5	-2.34357	5.84469
ENSG00000007908	SELE	-2.35796	10.1551
ENSG00000104081	BMF	-2.3602	28.6414
ENSG00000147408	CSGALNACT1	-2.36171	165.296
ENSG00000070526	ST6GALNAC1	-2.36644	3.72543
ENSG00000254122	PCDHGB7	-2.38061	70.0902
ENSG00000029534	ANK1	-2.38235	3.28199
ENSG00000077943	ITGA8	-2.38531	4.85922
ENSG00000105852	PON3	-2.40009	3.50445
ENSG00000175556	LONRF3	-2.40117	22.1913
ENSG00000137033	IL33	-2.40346	22.6624
ENSG00000196329	GIMAP5	-2.4059	2.4034
ENSG00000129521	EGLN3	-2.41618	3.71422
ENSG00000157570	TSPAN18	-2.42953	0
ENSG00000120278	PLEKHG1	-2.44166	0
ENSG00000166960	CCDC178	-2.44643	9.60875
ENSG00000274736	CCL23	-2.45072	4.48185
ENSG00000007129	CEACAM21	-2.45176	16.1818
ENSG00000164330	EBF1	-2.45607	3.5692
ENSG00000119686	FLVCR2	-2.45725	21.9789
ENSG00000101445	PPP1R16B	-2.46212	0
ENSG00000110077	MS4A6A	-2.4729	24.1211
ENSG00000169418	NPR1	-2.4752	65.3816
ENSG00000103489	XYLT1	-2.47813	28.509
ENSG00000158683	PKD1L1	-2.48034	24.9002
ENSG00000283632	EXOC3L2	-2.48809	3.07173
ENSG00000198535	C2CD4A	-2.49074	4.43419
ENSG00000179044	EXOC3L1	-2.49748	26.6871
ENSG00000054219	LY75	-2.52046	44.3929
ENSG00000172349	IL16	-2.5222	7.34289
ENSG00000152213	ARL11	-2.52955	4.73326
ENSG00000182326	C1S	-2.53507	6.49855
ENSG00000182022	CHST15	-2.5587	269.356
ENSG00000010319	SEMA3G	-2.58912	59.1092
ENSG00000188404	SELL	-2.60953	22.8328
ENSG00000186642	PDE2A	-2.61444	240.625
ENSG00000171115	GIMAP8	-2.6213	0
ENSG00000124749	COL21A1	-2.63069	24.3077
ENSG00000137225	CAPN11	-2.6362	12.0969
ENSG00000070182	SPTB	-2.63658	5.27405
ENSG00000103647	CORO2B	-2.64511	52.8205
ENSG00000079385	CEACAM1	-2.64638	22.93
ENSG00000152689	RASGRP3	-2.66339	192.479
ENSG00000184113	CLDN5	-2.6971	52.7402
ENSG00000113555	PCDH12	-2.70236	298.494
ENSG00000101331	CCM2L	-2.72083	45.7944
ENSG00000126838	PZP	-2.75321	6.26512
ENSG00000134215	VAV3	-2.76059	19.5294
ENSG00000170323	FABP4	-2.76236	91.162
ENSG00000006210	CX3CL1	-2.76499	5.25569
ENSG00000141293	SKAP1	-2.78137	5.8392
ENSG00000106003	LFNG	-2.82274	28.4869
ENSG00000136842	TMOD1	-2.83419	15.8385
ENSG00000118777	ABCG2	-2.85064	106.187
ENSG00000169129	AFAP1L2	-2.86144	6.81119
ENSG00000049249	TNFRSF9	-2.86754	3.34008
ENSG00000104938	CLEC4M	-2.89157	4.14977
ENSG00000102575	ACP5	-2.96101	7.33362
ENSG00000167037	SGSM1	-3.11755	11.6246
ENSG00000214814	FER1L6	-3.15388	4.98617
ENSG00000130755	GMFG	-3.177	60.6694
ENSG00000128917	DLL4	-3.26104	201.196
ENSG00000116690	PRG4	-3.37047	4.54574
ENSG00000015413	DPEP1	-3.6513	5.05106
ENSG00000137474	MYO7A	-3.67442	54.9207
ENSG00000204161	TMEM273	-3.76101	23.0827
ENSG00000123500	COL10A1	-3.79631	7.89199
ENSG00000184344	GDF3	-4.55142	17.7709

## Sheet: TAZ S89A_downregulated
Ensembl gene ID	Ensembl gene	log2(TAZ S89A/Ctrl)	-log10(P value)
ENSG00000258947	TUBB3	-1.00195	2.28299
ENSG00000170776	AKAP13	-1.00267	64.7628
ENSG00000166046	TCP11L2	-1.00287	14.2729
ENSG00000144369	FAM171B	-1.0035	40.5483
ENSG00000134780	DAGLA	-1.00352	11.1607
ENSG00000185133	INPP5J	-1.00414	2.24031
ENSG00000162654	GBP4	-1.00417	14.043
ENSG00000132879	FBXO44	-1.00429	19.0227
ENSG00000107611	CUBN	-1.00534	22.2934
ENSG00000185507	IRF7	-1.0055	8.17103
ENSG00000205593	DENND6B	-1.00623	3.59615
ENSG00000138336	TET1	-1.00641	2.60292
ENSG00000185155	MIXL1	-1.00657	1.66753
ENSG00000103855	CD276	-1.00751	66.4239
ENSG00000120156	TEK	-1.00963	95.4912
ENSG00000182218	HHIPL1	-1.00976	3.56366
ENSG00000107443	CCNJ	-1.00991	55.672
ENSG00000101850	GPR143	-1.01006	14.2095
ENSG00000185386	MAPK11	-1.01176	29.3222
ENSG00000179855	GIPC3	-1.01192	13.8965
ENSG00000196693	ZNF33B	-1.01213	30.6303
ENSG00000134871	COL4A2	-1.01221	96.1476
ENSG00000145675	PIK3R1	-1.01359	49.7554
ENSG00000170801	HTRA3	-1.01372	13.7507
ENSG00000099937	SERPIND1	-1.01437	16.0878
ENSG00000115194	SLC30A3	-1.01615	4.5667
ENSG00000153246	PLA2R1	-1.01642	56.4447
ENSG00000115594	IL1R1	-1.0174	45.6281
ENSG00000092068	SLC7A8	-1.01749	12.8453
ENSG00000203780	FANK1	-1.01752	5.49189
ENSG00000158373	HIST1H2BD	-1.01755	1.93977
ENSG00000160588	MPZL3	-1.01833	16.7145
ENSG00000165886	UBTD1	-1.01845	29.5103
ENSG00000177283	FZD8	-1.01997	11.4472
ENSG00000138722	MMRN1	-1.02061	72.954
ENSG00000116711	PLA2G4A	-1.02145	38.455
ENSG00000181409	AATK	-1.02206	2.63632
ENSG00000166444	ST5	-1.02267	8.67426
ENSG00000143842	SOX13	-1.02318	34.7703
ENSG00000126460	PRRG2	-1.02735	2.54735
ENSG00000158106	RHPN1	-1.02761	17.7999
ENSG00000121895	TMEM156	-1.02842	16.2475
ENSG00000269858	EGLN2	-1.02948	11.3772
ENSG00000173598	NUDT4	-1.03097	57.724
ENSG00000221843	C2orf16	-1.03177	7.63206
ENSG00000120324	PCDHB10	-1.03234	1.76656
ENSG00000147100	SLC16A2	-1.03257	7.07447
ENSG00000108947	EFNB3	-1.0334	11.9667
ENSG00000139055	ERP27	-1.03469	2.05713
ENSG00000166147	FBN1	-1.03789	105.041
ENSG00000102057	KCND1	-1.03901	3.80788
ENSG00000114770	ABCC5	-1.04	41.035
ENSG00000101670	LIPG	-1.04204	32.8924
ENSG00000139946	PELI2	-1.04298	28.2672
ENSG00000095370	SH2D3C	-1.04311	42.775
ENSG00000213928	IRF9	-1.04318	3.97131
ENSG00000143570	SLC39A1	-1.04362	1.85766
ENSG00000187608	ISG15	-1.04544	9.85371
ENSG00000184307	ZDHHC23	-1.04629	12.218
ENSG00000112182	BACH2	-1.04649	4.45954
ENSG00000186105	LRRC70	-1.04685	9.3263
ENSG00000148935	GAS2	-1.04778	3.09703
ENSG00000130653	PNPLA7	-1.04908	3.17604
ENSG00000105519	CAPS	-1.04964	3.67841
ENSG00000137331	IER3	-1.05	62.8582
ENSG00000263155	MYZAP	-1.05058	6.86645
ENSG00000196139	AKR1C3	-1.05074	15.5905
ENSG00000148400	NOTCH1	-1.05109	61.6287
ENSG00000154016	GRAP	-1.05188	4.1864
ENSG00000187720	THSD4	-1.0519	58.3241
ENSG00000136383	ALPK3	-1.05292	55.1379
ENSG00000197077	KIAA1671	-1.05354	72.7143
ENSG00000083750	RRAGB	-1.05389	14.2195
ENSG00000168758	SEMA4C	-1.05416	30.9587
ENSG00000182179	UBA7	-1.05442	24.1228
ENSG00000138606	SHF	-1.05511	6.50163
ENSG00000109046	WSB1	-1.05516	74.4547
ENSG00000172594	SMPDL3A	-1.05518	11.627
ENSG00000120875	DUSP4	-1.05562	65.8448
ENSG00000173269	MMRN2	-1.05571	128.657
ENSG00000251247	ZNF345	-1.05745	6.7336
ENSG00000135919	SERPINE2	-1.05794	9.35368
ENSG00000198246	SLC29A3	-1.05977	8.8051
ENSG00000104936	DMPK	-1.06048	17.6782
ENSG00000054392	HHAT	-1.0617	4.4737
ENSG00000115129	TP53I3	-1.06199	43.6864
ENSG00000235863	B3GALT4	-1.06285	2.42203
ENSG00000141579	ZNF750	-1.06359	2.02434
ENSG00000267534	S1PR2	-1.06363	2.25169
ENSG00000188322	SBK1	-1.06539	2.24608
ENSG00000159917	ZNF235	-1.0664	6.5904
ENSG00000150764	DIXDC1	-1.06644	70.3004
ENSG00000162745	OLFML2B	-1.06685	3.38224
ENSG00000174718	KIAA1551	-1.06832	65.6487
ENSG00000152784	PRDM8	-1.06875	2.17019
ENSG00000115109	EPB41L5	-1.07108	66.6038
ENSG00000151690	MFSD6	-1.0711	20.3883
ENSG00000197208	SLC22A4	-1.07176	5.9809
ENSG00000171724	VAT1L	-1.07217	7.81376
ENSG00000105204	DYRK1B	-1.07273	30.5034
ENSG00000239521	CASTOR3	-1.07498	15.9365
ENSG00000197565	COL4A6	-1.07526	14.5754
ENSG00000126709	IFI6	-1.07573	12.6848
ENSG00000073910	FRY	-1.07584	66.9656
ENSG00000221890	NPTXR	-1.07608	8.06627
ENSG00000104290	FZD3	-1.07764	8.86134
ENSG00000128512	DOCK4	-1.07819	125.028
ENSG00000172915	NBEA	-1.07891	23.3857
ENSG00000110237	ARHGEF17	-1.07925	54.6348
ENSG00000124721	DNAH8	-1.07995	6.57223
ENSG00000049769	PPP1R3F	-1.07997	3.79838
ENSG00000196782	MAML3	-1.08142	58.6976
ENSG00000166780	C16orf45	-1.08272	32.8792
ENSG00000111145	ELK3	-1.08296	109.523
ENSG00000205502	C2CD4B	-1.0833	2.54115
ENSG00000102934	PLLP	-1.08535	7.1296
ENSG00000137877	SPTBN5	-1.08634	23.8931
ENSG00000113594	LIFR	-1.08682	54.8053
ENSG00000161791	FMNL3	-1.08731	94.0534
ENSG00000003436	TFPI	-1.08792	93.4011
ENSG00000276409	CCL14	-1.09165	5.08089
ENSG00000237172	B3GNT9	-1.09166	4.94802
ENSG00000158292	GPR153	-1.09452	8.96116
ENSG00000125266	EFNB2	-1.09513	58.8696
ENSG00000197245	FAM110D	-1.09522	2.18925
ENSG00000114796	KLHL24	-1.09739	40.2468
ENSG00000243364	EFNA4	-1.09765	19.3048
ENSG00000197632	SERPINB2	-1.09773	4.20915
ENSG00000066735	KIF26A	-1.09901	17.3129
ENSG00000181031	RPH3AL	-1.09923	8.30583
ENSG00000168918	INPP5D	-1.10078	63.8524
ENSG00000112294	ALDH5A1	-1.10107	3.46693
ENSG00000081148	IMPG2	-1.10225	2.12064
ENSG00000103888	CEMIP	-1.10268	1.69981
ENSG00000161664	ASB16	-1.10308	2.41054
ENSG00000156711	MAPK13	-1.10404	8.58643
ENSG00000196411	EPHB4	-1.10725	90.7876
ENSG00000188153	COL4A5	-1.10817	84.3758
ENSG00000173894	CBX2	-1.10879	28.1083
ENSG00000117114	ADGRL2	-1.10965	93.8729
ENSG00000175130	MARCKSL1	-1.10994	94.7347
ENSG00000041353	RAB27B	-1.11213	2.17764
ENSG00000163131	CTSS	-1.11289	16.2401
ENSG00000135828	RNASEL	-1.11307	11.7806
ENSG00000089472	HEPH	-1.11441	2.53849
ENSG00000169756	LIMS1	-1.1152	69.5521
ENSG00000047346	FAM214A	-1.11706	64.8625
ENSG00000161682	FAM171A2	-1.11905	18.6921
ENSG00000158869	FCER1G	-1.12107	1.56531
ENSG00000171105	INSR	-1.1228	31.7952
ENSG00000133466	C1QTNF6	-1.12333	45.7075
ENSG00000160180	TFF3	-1.12441	2.32914
ENSG00000174059	CD34	-1.12462	61.9849
ENSG00000172183	ISG20	-1.12488	8.50359
ENSG00000079691	CARMIL1	-1.12554	15.3792
ENSG00000133874	RNF122	-1.12572	13.3387
ENSG00000139182	CLSTN3	-1.1261	58.109
ENSG00000115267	IFIH1	-1.12627	19.3135
ENSG00000164867	NOS3	-1.12715	59.1246
ENSG00000163297	ANTXR2	-1.12901	115.635
ENSG00000078804	TP53INP2	-1.12965	84.1501
ENSG00000143341	HMCN1	-1.12975	35.0756
ENSG00000131398	KCNC3	-1.13065	4.02506
ENSG00000102048	ASB9	-1.13068	11.3111
ENSG00000128567	PODXL	-1.13154	120.651
ENSG00000177374	HIC1	-1.13291	32.5209
ENSG00000184922	FMNL1	-1.13358	4.72434
ENSG00000004399	PLXND1	-1.13605	100.525
ENSG00000163346	PBXIP1	-1.13618	99.4904
ENSG00000180537	RNF182	-1.13731	12.6072
ENSG00000198873	GRK5	-1.13741	83.8363
ENSG00000106025	TSPAN12	-1.14086	46.0282
ENSG00000139597	N4BP2L1	-1.14115	2.88278
ENSG00000184500	PROS1	-1.14137	39.9088
ENSG00000085465	OVGP1	-1.1433	2.58346
ENSG00000154639	CXADR	-1.1466	21.7135
ENSG00000140678	ITGAX	-1.15047	2.74323
ENSG00000271447	MMP28	-1.1507	2.92921
ENSG00000006451	RALA	-1.15077	97.2352
ENSG00000166387	PPFIBP2	-1.15264	5.88569
ENSG00000175040	CHST2	-1.15365	15.5244
ENSG00000157873	TNFRSF14	-1.15457	23.7226
ENSG00000163513	TGFBR2	-1.15474	153.376
ENSG00000136141	LRCH1	-1.1548	51.4963
ENSG00000120549	KIAA1217	-1.15494	8.33476
ENSG00000101384	JAG1	-1.15519	100.611
ENSG00000117122	MFAP2	-1.15567	41.254
ENSG00000246922	UBAP1L	-1.15609	3.33336
ENSG00000156103	MMP16	-1.16053	64.9064
ENSG00000136378	ADAMTS7	-1.16141	48.3377
ENSG00000086730	LAT2	-1.1623	2.23626
ENSG00000010818	HIVEP2	-1.1628	33.0465
ENSG00000119699	TGFB3	-1.16343	8.53931
ENSG00000164850	GPER1	-1.16413	6.60584
ENSG00000081853	PCDHGA2	-1.16444	3.7878
ENSG00000162241	SLC25A45	-1.16655	4.62162
ENSG00000170681	CAVIN4	-1.16817	6.19924
ENSG00000165246	NLGN4Y	-1.17071	38.627
ENSG00000159388	BTG2	-1.17362	89.3161
ENSG00000104763	ASAH1	-1.17492	25.6027
ENSG00000140945	CDH13	-1.17518	60.258
ENSG00000047648	ARHGAP6	-1.17629	6.90816
ENSG00000128203	ASPHD2	-1.17908	15.0394
ENSG00000059377	TBXAS1	-1.18003	3.85567
ENSG00000123570	RAB9B	-1.18047	1.60328
ENSG00000182568	SATB1	-1.18079	24.5364
ENSG00000155849	ELMO1	-1.18087	67.008
ENSG00000141655	TNFRSF11A	-1.18122	31.6591
ENSG00000123892	RAB38	-1.18193	4.50628
ENSG00000058668	ATP2B4	-1.18341	153.826
ENSG00000109654	TRIM2	-1.18476	26.6625
ENSG00000164736	SOX17	-1.18556	20.4518
ENSG00000130508	PXDN	-1.18744	156.706
ENSG00000133639	BTG1	-1.18748	64.9515
ENSG00000124593	AL365205.1	-1.18985	3.17719
ENSG00000168542	COL3A1	-1.1906	24.0013
ENSG00000144560	VGLL4	-1.19265	69.5652
ENSG00000204442	FAM155A	-1.19271	28.142
ENSG00000064989	CALCRL	-1.19663	88.5186
ENSG00000165091	TMC1	-1.19688	1.6514
ENSG00000138646	HERC5	-1.19744	3.36523
ENSG00000197142	ACSL5	-1.20274	16.3531
ENSG00000100342	APOL1	-1.20292	45.5942
ENSG00000197872	FAM49A	-1.20387	97.776
ENSG00000138080	EMILIN1	-1.20469	2.8149
ENSG00000154262	ABCA6	-1.20483	50.3205
ENSG00000158458	NRG2	-1.20651	2.04543
ENSG00000204131	NHSL2	-1.20829	109.99
ENSG00000115008	IL1A	-1.20866	5.55313
ENSG00000168016	TRANK1	-1.2098	38.5221
ENSG00000102935	ZNF423	-1.2101	10.8014
ENSG00000178150	ZNF114	-1.21122	2.22825
ENSG00000153885	KCTD15	-1.21259	73.0533
ENSG00000110852	CLEC2B	-1.21277	15.225
ENSG00000187796	CARD9	-1.21287	1.92564
ENSG00000163239	TDRD10	-1.21388	7.98772
ENSG00000115525	ST3GAL5	-1.21412	46.7452
ENSG00000205403	CFI	-1.21437	18.7087
ENSG00000112981	NME5	-1.21446	3.79229
ENSG00000182118	FAM89A	-1.21612	10.3679
ENSG00000054690	PLEKHH1	-1.21631	1.84737
ENSG00000253537	PCDHGA7	-1.21636	4.28104
ENSG00000116396	KCNC4	-1.21876	49.4921
ENSG00000130052	STARD8	-1.22311	38.7885
ENSG00000145687	SSBP2	-1.22446	28.849
ENSG00000188277	C15orf62	-1.22625	2.2022
ENSG00000140398	NEIL1	-1.22782	19.9924
ENSG00000110002	VWA5A	-1.2296	56.4859
ENSG00000198753	PLXNB3	-1.2297	34.6381
ENSG00000143772	ITPKB	-1.23027	74.6042
ENSG00000129467	ADCY4	-1.23038	51.3955
ENSG00000128641	MYO1B	-1.23096	111.748
ENSG00000138435	CHRNA1	-1.23145	11.8904
ENSG00000204385	SLC44A4	-1.23213	2.85364
ENSG00000213462	ERV3-1	-1.2326	48.913
ENSG00000249242	TMEM150C	-1.23485	19.8371
ENSG00000157613	CREB3L1	-1.23503	13.2305
ENSG00000072195	SPEG	-1.23666	4.36609
ENSG00000073756	PTGS2	-1.23745	20.7584
ENSG00000081189	MEF2C	-1.24024	86.5761
ENSG00000185339	TCN2	-1.24198	112.625
ENSG00000117525	F3	-1.24331	4.32037
ENSG00000156966	B3GNT7	-1.24356	3.11871
ENSG00000198513	ATL1	-1.24587	4.56742
ENSG00000162944	RFTN2	-1.24637	28.4637
ENSG00000013016	EHD3	-1.24769	8.49318
ENSG00000156298	TSPAN7	-1.24783	10.6989
ENSG00000112183	RBM24	-1.24916	7.24829
ENSG00000118292	C1orf54	-1.25136	29.5636
ENSG00000167306	MYO5B	-1.25247	4.92757
ENSG00000131477	RAMP2	-1.25272	8.38769
ENSG00000146950	SHROOM2	-1.25532	79.9524
ENSG00000068001	HYAL2	-1.25573	96.4758
ENSG00000196628	TCF4	-1.25655	129.021
ENSG00000197385	ZNF860	-1.2587	9.13596
ENSG00000178718	RPP25	-1.25936	50.5863
ENSG00000160325	CACFD1	-1.26109	12.18
ENSG00000008513	ST3GAL1	-1.26167	124.648
ENSG00000103528	SYT17	-1.26336	3.53037
ENSG00000181444	ZNF467	-1.26358	20.8814
ENSG00000186409	CCDC30	-1.26768	3.42338
ENSG00000138172	CALHM2	-1.26977	35.4301
ENSG00000257108	NHLRC4	-1.27051	1.88848
ENSG00000111052	LIN7A	-1.27061	14.877
ENSG00000169026	SLC49A3	-1.27099	2.03517
ENSG00000153707	PTPRD	-1.27149	29.3829
ENSG00000165449	SLC16A9	-1.27224	2.8289
ENSG00000182541	LIMK2	-1.27255	106.477
ENSG00000076555	ACACB	-1.27315	8.57743
ENSG00000135678	CPM	-1.27409	3.71388
ENSG00000146094	DOK3	-1.27431	8.11695
ENSG00000146242	TPBG	-1.27446	37.3496
ENSG00000127920	GNG11	-1.27493	106.987
ENSG00000132510	KDM6B	-1.27803	53.3136
ENSG00000148700	ADD3	-1.27961	103.099
ENSG00000047617	ANO2	-1.28058	15.2104
ENSG00000171462	DLK2	-1.28257	1.59238
ENSG00000164056	SPRY1	-1.28332	11.2929
ENSG00000198795	ZNF521	-1.28337	129.674
ENSG00000158813	EDA	-1.28859	5.54626
ENSG00000162511	LAPTM5	-1.28871	113.872
ENSG00000126950	TMEM35A	-1.28884	20.2331
ENSG00000183615	FAM167B	-1.29013	1.96613
ENSG00000198075	SULT1C4	-1.29032	27.5912
ENSG00000117461	PIK3R3	-1.29407	41.6784
ENSG00000099250	NRP1	-1.29632	171.306
ENSG00000075826	SEC31B	-1.29739	33.2266
ENSG00000173890	GPR160	-1.29782	8.78741
ENSG00000106714	CNTNAP3	-1.29893	48.3223
ENSG00000134070	IRAK2	-1.29932	44.8084
ENSG00000185215	TNFAIP2	-1.30018	28.6352
ENSG00000197321	SVIL	-1.301	153.303
ENSG00000133710	SPINK5	-1.30155	10.1355
ENSG00000114812	VIPR1	-1.30311	6.07419
ENSG00000140931	CMTM3	-1.30399	97.7695
ENSG00000137507	LRRC32	-1.30447	98.1645
ENSG00000171533	MAP6	-1.30471	4.41207
ENSG00000177409	SAMD9L	-1.30584	70.4098
ENSG00000072786	STK10	-1.31006	84.5993
ENSG00000075275	CELSR1	-1.31022	7.96182
ENSG00000099204	ABLIM1	-1.31282	135.04
ENSG00000142798	HSPG2	-1.31514	20.0219
ENSG00000143387	CTSK	-1.31575	14.1566
ENSG00000157551	KCNJ15	-1.31636	5.69256
ENSG00000133083	DCLK1	-1.31703	3.98444
ENSG00000140511	HAPLN3	-1.3199	30.6443
ENSG00000272899	ATP6V1FNB	-1.32014	1.64366
ENSG00000143469	SYT14	-1.32185	3.68484
ENSG00000099953	MMP11	-1.32579	16.7902
ENSG00000099282	TSPAN15	-1.32672	74.3239
ENSG00000004139	SARM1	-1.32811	4.34013
ENSG00000225828	FAM229A	-1.32937	5.0126
ENSG00000108342	CSF3	-1.33154	4.3173
ENSG00000100191	SLC5A4	-1.33398	3.38489
ENSG00000188559	RALGAPA2	-1.33749	93.2362
ENSG00000213626	LBH	-1.33857	4.39915
ENSG00000114115	RBP1	-1.33879	3.87852
ENSG00000126785	RHOJ	-1.34024	192.297
ENSG00000175048	ZDHHC14	-1.34107	59.179
ENSG00000085871	MGST2	-1.34169	65.2646
ENSG00000154118	JPH3	-1.34222	5.01844
ENSG00000120885	CLU	-1.3427	139.847
ENSG00000088053	GP6	-1.34417	1.65894
ENSG00000280537	AC068946.1	-1.34455	1.97154
ENSG00000137266	SLC22A23	-1.34497	39.7214
ENSG00000256061	DNAAF4	-1.34611	3.13923
ENSG00000163380	LMOD3	-1.3513	1.84975
ENSG00000107957	SH3PXD2A	-1.35191	65.7784
ENSG00000100100	PIK3IP1	-1.35238	24.4313
ENSG00000138642	HERC6	-1.35348	19.387
ENSG00000187942	LDLRAD2	-1.35524	7.41601
ENSG00000146859	TMEM140	-1.35544	30.7872
ENSG00000160678	S100A1	-1.35597	2.16153
ENSG00000151117	TMEM86A	-1.35768	7.06761
ENSG00000118257	NRP2	-1.3579	234.534
ENSG00000164946	FREM1	-1.35868	2.48105
ENSG00000148180	GSN	-1.35986	130.195
ENSG00000103034	NDRG4	-1.3599	65.5615
ENSG00000171729	TMEM51	-1.36249	37.4957
ENSG00000117643	MAN1C1	-1.36566	4.30152
ENSG00000170271	FAXDC2	-1.36791	22.0563
ENSG00000164938	TP53INP1	-1.36901	95.3056
ENSG00000251322	SHANK3	-1.36994	93.4248
ENSG00000137509	PRCP	-1.37322	208.624
ENSG00000170873	MTSS1	-1.37324	113.719
ENSG00000254087	LYN	-1.37387	126.798
ENSG00000187498	COL4A1	-1.3755	251.13
ENSG00000141431	ASXL3	-1.37554	3.59395
ENSG00000262576	PCDHGA4	-1.37559	7.58195
ENSG00000147113	CXorf36	-1.3761	157.768
ENSG00000185527	PDE6G	-1.37722	2.96994
ENSG00000226650	KIF4B	-1.37949	2.08522
ENSG00000196074	SYCP2	-1.38145	3.27803
ENSG00000167100	SAMD14	-1.38174	20.0118
ENSG00000150636	CCDC102B	-1.38324	5.13036
ENSG00000011347	SYT7	-1.38343	1.59464
ENSG00000183018	SPNS2	-1.38363	44.798
ENSG00000105639	JAK3	-1.38554	3.93307
ENSG00000175274	TP53I11	-1.38581	101.003
ENSG00000135636	DYSF	-1.38758	142.109
ENSG00000173918	C1QTNF1	-1.38911	7.13775
ENSG00000128342	LIF	-1.38945	1.67611
ENSG00000152926	ZNF117	-1.39053	98.8415
ENSG00000139971	ARMH4	-1.39109	5.24796
ENSG00000161921	CXCL16	-1.39166	31.3754
ENSG00000163171	CDC42EP3	-1.39371	154.314
ENSG00000102174	PHEX	-1.39485	12.7311
ENSG00000184497	TMEM255B	-1.39666	53.0049
ENSG00000136732	GYPC	-1.39787	7.75304
ENSG00000141338	ABCA8	-1.39912	99.4273
ENSG00000174125	TLR1	-1.40017	18.1269
ENSG00000171680	PLEKHG5	-1.40247	68.5731
ENSG00000185630	PBX1	-1.40465	46.1486
ENSG00000196407	THEM5	-1.40568	2.8188
ENSG00000188070	C11orf95	-1.40645	84.4542
ENSG00000112852	PCDHB2	-1.40647	3.12233
ENSG00000073849	ST6GAL1	-1.40742	220.245
ENSG00000011105	TSPAN9	-1.40754	112.056
ENSG00000166265	CYYR1	-1.40761	67.9268
ENSG00000163072	NOSTRIN	-1.40904	4.11679
ENSG00000143630	HCN3	-1.40969	6.0152
ENSG00000124766	SOX4	-1.4134	155.247
ENSG00000169242	EFNA1	-1.41495	65.2378
ENSG00000093072	ADA2	-1.41734	6.9029
ENSG00000129295	LRRC6	-1.41954	9.92917
ENSG00000125945	ZNF436	-1.42033	66.2709
ENSG00000156535	CD109	-1.42224	156.516
ENSG00000129538	RNASE1	-1.42319	114.48
ENSG00000198732	SMOC1	-1.42407	4.85617
ENSG00000154721	JAM2	-1.42538	2.30496
ENSG00000008283	CYB561	-1.42766	70.4848
ENSG00000128284	APOL3	-1.42772	49.0009
ENSG00000133321	RARRES3	-1.42847	2.78289
ENSG00000158077	NLRP14	-1.4291	7.46075
ENSG00000227051	C14orf132	-1.42943	14.0426
ENSG00000185291	IL3RA	-1.42979	12.8239
ENSG00000196468	FGF16	-1.43	15.9246
ENSG00000137809	ITGA11	-1.43044	10.2231
ENSG00000183578	TNFAIP8L3	-1.43127	104.871
ENSG00000158769	F11R	-1.4321	141.594
ENSG00000165029	ABCA1	-1.43444	30.2872
ENSG00000203727	SAMD5	-1.43473	57.9742
ENSG00000086205	FOLH1	-1.4372	1.65249
ENSG00000253305	PCDHGB6	-1.43859	7.45932
ENSG00000204248	COL11A2	-1.4406	3.15124
ENSG00000137673	MMP7	-1.44341	2.55478
ENSG00000164035	EMCN	-1.44361	147.328
ENSG00000011523	CEP68	-1.44439	91.0834
ENSG00000185909	KLHDC8B	-1.44439	46.4159
ENSG00000183638	RP1L1	-1.44582	5.90175
ENSG00000172348	RCAN2	-1.44721	3.59943
ENSG00000177076	ACER2	-1.44891	17.2374
ENSG00000146021	KLHL3	-1.45485	74.6536
ENSG00000106560	GIMAP2	-1.45541	64.4882
ENSG00000136367	ZFHX2	-1.45821	13.306
ENSG00000172403	SYNPO2	-1.4602	4.11151
ENSG00000167992	VWCE	-1.46447	9.70141
ENSG00000141965	FEM1A	-1.46873	5.85308
ENSG00000128872	TMOD2	-1.46876	14.2441
ENSG00000163762	TM4SF18	-1.46907	112.683
ENSG00000130307	USHBP1	-1.47072	16.8806
ENSG00000132530	XAF1	-1.47123	9.78669
ENSG00000136859	ANGPTL2	-1.47215	79.2143
ENSG00000205085	FAM71F2	-1.4727	2.51654
ENSG00000106688	SLC1A1	-1.47318	117.026
ENSG00000179981	TSHZ1	-1.47416	85.8336
ENSG00000135299	ANKRD6	-1.47465	14.6003
ENSG00000154258	ABCA9	-1.47572	12.604
ENSG00000119866	BCL11A	-1.47941	3.37905
ENSG00000109458	GAB1	-1.48004	76.7899
ENSG00000225968	ELFN1	-1.48128	6.18625
ENSG00000173482	PTPRM	-1.48205	105.953
ENSG00000163590	PPM1L	-1.48466	15.7866
ENSG00000175356	SCUBE2	-1.4847	2.68637
ENSG00000101605	MYOM1	-1.48655	2.02031
ENSG00000141519	CCDC40	-1.48965	6.88447
ENSG00000129675	ARHGEF6	-1.49434	37.8772
ENSG00000114923	SLC4A3	-1.49892	3.05789
ENSG00000117707	PROX1	-1.50043	32.503
ENSG00000137486	ARRB1	-1.50112	114.589
ENSG00000204381	LAYN	-1.50119	3.5699
ENSG00000158859	ADAMTS4	-1.50133	91.0126
ENSG00000068831	RASGRP2	-1.50347	3.54003
ENSG00000143344	RGL1	-1.5045	163.334
ENSG00000171227	TMEM37	-1.50619	18.9629
ENSG00000157510	AFAP1L1	-1.50637	149.84
ENSG00000094755	GABRP	-1.50685	2.44768
ENSG00000008517	IL32	-1.50714	26.5968
ENSG00000177294	FBXO39	-1.50884	7.90465
ENSG00000164604	GPR85	-1.51083	3.18565
ENSG00000196460	RFX8	-1.51232	2.73667
ENSG00000144821	MYH15	-1.51343	4.3599
ENSG00000174348	PODN	-1.51413	3.50358
ENSG00000198355	PIM3	-1.51448	142.519
ENSG00000143127	ITGA10	-1.51598	123.436
ENSG00000147119	CHST7	-1.51689	22.2577
ENSG00000124635	HIST1H2BJ	-1.51778	1.61474
ENSG00000169291	SHE	-1.51901	186.051
ENSG00000103044	HAS3	-1.51941	8.38548
ENSG00000171236	LRG1	-1.51992	1.95197
ENSG00000165949	IFI27	-1.52516	80.8256
ENSG00000171502	COL24A1	-1.5321	2.52489
ENSG00000184588	PDE4B	-1.53654	185.664
ENSG00000165071	TMEM71	-1.53662	24.2409
ENSG00000100234	TIMP3	-1.53726	4.51887
ENSG00000160179	ABCG1	-1.53775	42.3953
ENSG00000143369	ECM1	-1.53878	48.527
ENSG00000167772	ANGPTL4	-1.53983	44.9197
ENSG00000136490	LIMD2	-1.54044	45.4238
ENSG00000146197	SCUBE3	-1.54086	15.1087
ENSG00000155962	CLIC2	-1.54131	14.8693
ENSG00000171496	OR1L8	-1.5416	4.07175
ENSG00000061918	GUCY1B1	-1.54171	11.3724
ENSG00000038945	MSR1	-1.5463	2.37407
ENSG00000272674	PCDHB16	-1.54719	2.10762
ENSG00000187068	C3orf70	-1.54908	2.70873
ENSG00000116661	FBXO2	-1.55011	3.57552
ENSG00000116194	ANGPTL1	-1.55202	2.00181
ENSG00000137975	CLCA2	-1.55339	1.83837
ENSG00000168939	SPRY3	-1.55435	18.0083
ENSG00000197261	C6orf141	-1.55475	9.50245
ENSG00000165757	JCAD	-1.55543	182.617
ENSG00000181885	CLDN7	-1.55588	28.3781
ENSG00000131634	TMEM204	-1.55709	21.6926
ENSG00000137878	GCOM1	-1.55712	21.7247
ENSG00000133800	LYVE1	-1.55736	103.122
ENSG00000185955	C7orf61	-1.55747	3.13645
ENSG00000065534	MYLK	-1.55866	48.2599
ENSG00000180573	HIST1H2AC	-1.55867	11.3082
ENSG00000119917	IFIT3	-1.56059	18.8803
ENSG00000037280	FLT4	-1.56378	88.0185
ENSG00000173535	TNFRSF10C	-1.56384	63.6429
ENSG00000185352	HS6ST3	-1.56538	3.59787
ENSG00000114270	COL7A1	-1.56741	2.16727
ENSG00000181652	ATG9B	-1.5682	9.15622
ENSG00000140009	ESR2	-1.57046	1.9935
ENSG00000023171	GRAMD1B	-1.57173	27.2136
ENSG00000072201	LNX1	-1.5736	11.0831
ENSG00000172578	KLHL6	-1.57385	78.6303
ENSG00000164125	FAM198B	-1.5763	173.3
ENSG00000165152	TMEM246	-1.57917	7.14189
ENSG00000143036	SLC44A3	-1.57977	2.24878
ENSG00000172602	RND1	-1.58001	8.83142
ENSG00000185614	INKA1	-1.58338	12.7568
ENSG00000203883	SOX18	-1.58816	75.1251
ENSG00000156049	GNA14	-1.58989	16.1739
ENSG00000162849	KIF26B	-1.59059	2.12508
ENSG00000110900	TSPAN11	-1.59082	32.5314
ENSG00000196169	KIF19	-1.5935	4.1297
ENSG00000163637	PRICKLE2	-1.59678	34.1079
ENSG00000119938	PPP1R3C	-1.59848	12.5834
ENSG00000091428	RAPGEF4	-1.59874	38.0115
ENSG00000160712	IL6R	-1.59962	39.5819
ENSG00000111962	UST	-1.59984	5.70511
ENSG00000174130	TLR6	-1.60249	25.809
ENSG00000145794	MEGF10	-1.60376	3.05804
ENSG00000100336	APOL4	-1.60382	5.10416
ENSG00000008516	MMP25	-1.60624	1.86364
ENSG00000091844	RGS17	-1.6084	18.8753
ENSG00000240583	AQP1	-1.60869	21.1647
ENSG00000180730	SHISA2	-1.60879	13.812
ENSG00000105246	EBI3	-1.60972	2.10468
ENSG00000077943	ITGA8	-1.61024	2.95626
ENSG00000109501	WFS1	-1.61178	148.062
ENSG00000006210	CX3CL1	-1.61211	3.13276
ENSG00000171864	PRND	-1.61346	4.39758
ENSG00000166257	SCN3B	-1.61406	10.7234
ENSG00000183496	MEX3B	-1.61434	43.8729
ENSG00000189184	PCDH18	-1.6151	14.0571
ENSG00000138678	GPAT3	-1.61527	22.0156
ENSG00000154162	CDH12	-1.61692	7.86107
ENSG00000154025	SLC5A10	-1.6181	2.40624
ENSG00000005187	ACSM3	-1.6187	24.2935
ENSG00000151276	MAGI1	-1.61892	132.26
ENSG00000188897	AC099489.1	-1.61984	3.4267
ENSG00000158528	PPP1R9A	-1.62252	10.5015
ENSG00000178175	ZNF366	-1.62413	15.4031
ENSG00000118407	FILIP1	-1.62424	9.15136
ENSG00000176809	LRRC37A3	-1.62546	16.2257
ENSG00000129646	QRICH2	-1.62835	11.5567
ENSG00000164932	CTHRC1	-1.63156	32.5317
ENSG00000164687	FABP5	-1.63178	105.644
ENSG00000189058	APOD	-1.63215	12.2257
ENSG00000141753	IGFBP4	-1.63627	210.686
ENSG00000196358	NTNG2	-1.63671	2.14601
ENSG00000107551	RASSF4	-1.64103	71.3201
ENSG00000126882	FAM78A	-1.6412	129.163
ENSG00000167861	HID1	-1.6426	117.23
ENSG00000128833	MYO5C	-1.64361	55.969
ENSG00000183111	ARHGEF37	-1.64422	46.4667
ENSG00000255690	TRIL	-1.64782	3.37785
ENSG00000102755	FLT1	-1.64881	242.059
ENSG00000160271	RALGDS	-1.65025	30.3735
ENSG00000253731	PCDHGA6	-1.65039	13.3629
ENSG00000026103	FAS	-1.65093	28.0623
ENSG00000143434	SEMA6C	-1.65184	76.0395
ENSG00000136630	HLX	-1.65668	19.399
ENSG00000165895	ARHGAP42	-1.65711	21.8257
ENSG00000101017	CD40	-1.65761	47.3814
ENSG00000107282	APBA1	-1.65843	11.9136
ENSG00000114654	EFCC1	-1.66013	2.43004
ENSG00000196421	C20orf204	-1.6602	10.897
ENSG00000186377	CYP4X1	-1.66036	3.81363
ENSG00000159640	ACE	-1.66086	60.2279
ENSG00000140557	ST8SIA2	-1.66141	4.84811
ENSG00000158856	DMTN	-1.66302	56.439
ENSG00000162490	DRAXIN	-1.66357	14.5681
ENSG00000087237	CETP	-1.66602	10.4166
ENSG00000254245	PCDHGA3	-1.66661	3.21157
ENSG00000091879	ANGPT2	-1.66724	194.22
ENSG00000069812	HES2	-1.66768	46.2667
ENSG00000107731	UNC5B	-1.67273	14.9099
ENSG00000136960	ENPP2	-1.67584	3.19498
ENSG00000149212	SESN3	-1.67624	72.4717
ENSG00000168675	LDLRAD4	-1.6789	9.57244
ENSG00000174844	DNAH12	-1.68007	2.02614
ENSG00000089127	OAS1	-1.68167	40.2255
ENSG00000261371	PECAM1	-1.68284	0
ENSG00000177459	ERICH5	-1.68383	1.76058
ENSG00000127152	BCL11B	-1.68586	2.36513
ENSG00000185737	NRG3	-1.68715	44.0276
ENSG00000141527	CARD14	-1.68749	2.05099
ENSG00000274750	HIST1H3E	-1.70234	10.6236
ENSG00000120594	PLXDC2	-1.70452	4.0051
ENSG00000158406	HIST1H4H	-1.70713	4.09837
ENSG00000122644	ARL4A	-1.7075	67.8704
ENSG00000104894	CD37	-1.7079	6.64452
ENSG00000196209	SIRPB2	-1.71231	24.0664
ENSG00000180884	ZNF792	-1.71259	72.047
ENSG00000119630	PGF	-1.71314	193.091
ENSG00000057704	TMCC3	-1.71477	156.568
ENSG00000172349	IL16	-1.71945	4.47943
ENSG00000144339	TMEFF2	-1.7211	3.10471
ENSG00000163947	ARHGEF3	-1.72357	124.321
ENSG00000161940	BCL6B	-1.72361	219.865
ENSG00000090776	EFNB1	-1.72459	107.867
ENSG00000114200	BCHE	-1.72758	39.4739
ENSG00000115828	QPCT	-1.72782	52.3188
ENSG00000106852	LHX6	-1.72831	10.45
ENSG00000152760	TCTEX1D1	-1.73004	21.6875
ENSG00000160145	KALRN	-1.73159	75.1592
ENSG00000102996	MMP15	-1.73163	60.4572
ENSG00000148123	PLPPR1	-1.73609	18.9011
ENSG00000124772	CPNE5	-1.73655	27.863
ENSG00000170962	PDGFD	-1.737	57.339
ENSG00000129596	CDO1	-1.73943	10.4018
ENSG00000101695	RNF125	-1.74144	20.0755
ENSG00000162645	GBP2	-1.74476	163.511
ENSG00000019991	HGF	-1.74728	3.53156
ENSG00000173801	JUP	-1.74824	143.025
ENSG00000174004	NRROS	-1.7495	26.6321
ENSG00000139970	RTN1	-1.75276	2.81732
ENSG00000072952	MRVI1	-1.75571	8.77084
ENSG00000135063	FAM189A2	-1.7599	6.42031
ENSG00000162415	ZSWIM5	-1.76257	12.8877
ENSG00000165194	PCDH19	-1.76709	15.8443
ENSG00000170537	TMC7	-1.76776	25.4592
ENSG00000157404	KIT	-1.76904	142.703
ENSG00000226979	LTA	-1.76983	2.49725
ENSG00000177685	CRACR2B	-1.77282	12.854
ENSG00000135643	KCNMB4	-1.77411	15.0244
ENSG00000265972	TXNIP	-1.7778	135.282
ENSG00000196611	MMP1	-1.7798	0
ENSG00000213023	SYT3	-1.78192	2.50278
ENSG00000160111	CPAMD8	-1.78473	9.90103
ENSG00000146469	VIP	-1.78476	4.01181
ENSG00000057657	PRDM1	-1.78671	11.9782
ENSG00000085831	TTC39A	-1.78872	9.99702
ENSG00000146409	SLC18B1	-1.79259	47.6498
ENSG00000213203	GIMAP1	-1.79342	71.1174
ENSG00000035664	DAPK2	-1.79559	7.86051
ENSG00000143554	SLC27A3	-1.79582	43.0811
ENSG00000036530	CYP46A1	-1.79812	3.32677
ENSG00000138449	SLC40A1	-1.7987	126.601
ENSG00000174370	C11orf45	-1.80029	5.78561
ENSG00000175899	A2M	-1.80748	10.7168
ENSG00000120327	PCDHB14	-1.8097	8.68665
ENSG00000163701	IL17RE	-1.81295	2.4107
ENSG00000068615	REEP1	-1.81602	5.96587
ENSG00000253958	CLDN23	-1.8177	1.84212
ENSG00000215788	TNFRSF25	-1.81824	42.5928
ENSG00000128594	LRRC4	-1.81962	17.6766
ENSG00000253846	PCDHGA10	-1.8199	16.8093
ENSG00000087303	NID2	-1.8226	135.318
ENSG00000070526	ST6GALNAC1	-1.8234	2.79574
ENSG00000183307	TMEM121B	-1.82606	4.53288
ENSG00000101096	NFATC2	-1.82611	110.58
ENSG00000121966	CXCR4	-1.83254	145.924
ENSG00000113209	PCDHB5	-1.83633	4.55934
ENSG00000151692	RNF144A	-1.84317	91.118
ENSG00000136161	RCBTB2	-1.84431	64.137
ENSG00000185477	GPRIN3	-1.84436	26.8631
ENSG00000088756	ARHGAP28	-1.84622	107.54
ENSG00000126545	CSN1S1	-1.8478	1.85436
ENSG00000187513	GJA4	-1.84936	38.7019
ENSG00000133056	PIK3C2B	-1.85698	141.912
ENSG00000162407	PLPP3	-1.86046	123.157
ENSG00000113248	PCDHB15	-1.86108	6.52721
ENSG00000150540	HNMT	-1.86222	45.3058
ENSG00000164683	HEY1	-1.87111	16.4272
ENSG00000126759	CFP	-1.87253	4.78789
ENSG00000168646	AXIN2	-1.87384	12.5162
ENSG00000178947	SMIM10L2A	-1.88177	4.99614
ENSG00000248643	RBM14-RBM4	-1.88286	2.48891
ENSG00000091972	CD200	-1.88363	69.9864
ENSG00000155465	SLC7A7	-1.88699	52.1808
ENSG00000089199	CHGB	-1.89084	2.50469
ENSG00000175264	CHST1	-1.89445	96.3856
ENSG00000183346	CABCOCO1	-1.89727	5.83883
ENSG00000092421	SEMA6A	-1.89878	30.7697
ENSG00000124406	ATP8A1	-1.90206	17.018
ENSG00000139329	LUM	-1.90251	15.4313
ENSG00000142405	NLRP12	-1.90416	3.57684
ENSG00000188993	LRRC66	-1.90421	4.22141
ENSG00000138378	STAT4	-1.90591	3.9164
ENSG00000133574	GIMAP4	-1.90941	0
ENSG00000106537	TSPAN13	-1.91064	79.6678
ENSG00000135362	PRR5L	-1.91596	21.8971
ENSG00000240065	PSMB9	-1.91752	3.81937
ENSG00000173200	PARP15	-1.92137	7.47906
ENSG00000272636	DOC2B	-1.92627	2.07203
ENSG00000166960	CCDC178	-1.9265	7.53779
ENSG00000071246	VASH1	-1.92751	250.654
ENSG00000178695	KCTD12	-1.93008	238.161
ENSG00000187944	C2orf66	-1.93208	3.90969
ENSG00000113532	ST8SIA4	-1.93272	69.824
ENSG00000165272	AQP3	-1.93388	6.00032
ENSG00000159314	ARHGAP27	-1.93837	84.9708
ENSG00000163083	INHBB	-1.93978	9.33925
ENSG00000005108	THSD7A	-1.94252	109.243
ENSG00000196338	NLGN3	-1.94451	3.83503
ENSG00000175874	CREG2	-1.94644	18.2868
ENSG00000101265	RASSF2	-1.95892	232.463
ENSG00000182575	NXPH3	-1.95918	7.12388
ENSG00000181790	ADGRB1	-1.96531	1.94354
ENSG00000167646	DNAAF3	-1.96654	1.62269
ENSG00000186994	KANK3	-1.97437	35.9274
ENSG00000196932	TMEM26	-1.97903	3.9905
ENSG00000138185	ENTPD1	-1.99188	104.856
ENSG00000154864	PIEZO2	-1.99338	242.29
ENSG00000085117	CD82	-1.99548	74.1039
ENSG00000137033	IL33	-1.99658	15.7138
ENSG00000170835	CEL	-1.99903	4.4556
ENSG00000125878	TCF15	-2.00241	5.6273
ENSG00000198719	DLL1	-2.01835	17.1517
ENSG00000151322	NPAS3	-2.01915	2.12649
ENSG00000159167	STC1	-2.01925	47.2963
ENSG00000158555	GDPD5	-2.02047	115.853
ENSG00000139679	LPAR6	-2.02518	129.719
ENSG00000104361	NIPAL2	-2.02643	24.3817
ENSG00000206561	COLQ	-2.02731	2.25899
ENSG00000143851	PTPN7	-2.02822	3.56225
ENSG00000155093	PTPRN2	-2.03214	11.8702
ENSG00000125810	CD93	-2.0367	0
ENSG00000116574	RHOU	-2.03985	5.61947
ENSG00000121797	CCRL2	-2.04379	33.963
ENSG00000163638	ADAMTS9	-2.0486	0
ENSG00000254122	PCDHGB7	-2.04906	54.9259
ENSG00000110675	ELMOD1	-2.04943	28.2648
ENSG00000235750	KIAA0040	-2.05485	162.82
ENSG00000143603	KCNN3	-2.05711	30.9381
ENSG00000262209	PCDHGB3	-2.05881	4.95744
ENSG00000135363	LMO2	-2.06687	140.708
ENSG00000159307	SCUBE1	-2.06694	15.1472
ENSG00000276644	DACH1	-2.06736	89.8947
ENSG00000198336	MYL4	-2.06866	5.02235
ENSG00000168961	LGALS9	-2.06969	55.1279
ENSG00000074211	PPP2R2C	-2.0712	2.5706
ENSG00000204301	NOTCH4	-2.08214	139.783
ENSG00000170748	RBMXL2	-2.0838	5.12945
ENSG00000169248	CXCL11	-2.08385	21.9505
ENSG00000186451	SPATA12	-2.09195	3.02442
ENSG00000135074	ADAM19	-2.09217	223.168
ENSG00000186469	GNG2	-2.09294	6.86039
ENSG00000135218	CD36	-2.098	15.2773
ENSG00000064692	SNCAIP	-2.10397	50.031
ENSG00000185585	OLFML2A	-2.1046	6.9716
ENSG00000133561	GIMAP6	-2.10724	0
ENSG00000164440	TXLNB	-2.11781	3.55471
ENSG00000115252	PDE1A	-2.12267	1.61858
ENSG00000139187	KLRG1	-2.12285	29.0585
ENSG00000133805	AMPD3	-2.12873	14.1229
ENSG00000153822	KCNJ16	-2.12969	3.99249
ENSG00000169247	SH3TC2	-2.14023	30.1545
ENSG00000064042	LIMCH1	-2.14395	116.904
ENSG00000127533	F2RL3	-2.14657	12.6222
ENSG00000203722	RAET1G	-2.15481	4.72061
ENSG00000243232	PCDHAC2	-2.16123	17.3776
ENSG00000185745	IFIT1	-2.16983	8.66251
ENSG00000186642	PDE2A	-2.17418	187.168
ENSG00000187372	PCDHB13	-2.17663	11.673
ENSG00000105642	KCNN1	-2.17751	5.3401
ENSG00000106003	LFNG	-2.18302	21.4027
ENSG00000130300	PLVAP	-2.18347	17.5091
ENSG00000166670	MMP10	-2.18781	100.796
ENSG00000163491	NEK10	-2.18956	22.5261
ENSG00000007129	CEACAM21	-2.19432	13.4272
ENSG00000169418	NPR1	-2.19646	53.564
ENSG00000137959	IFI44L	-2.19974	24.7117
ENSG00000129521	EGLN3	-2.20429	3.15214
ENSG00000104081	BMF	-2.20598	24.5852
ENSG00000137225	CAPN11	-2.21195	9.40056
ENSG00000154928	EPHB1	-2.21642	4.0234
ENSG00000172159	FRMD3	-2.21734	20.8573
ENSG00000124019	FAM124B	-2.21857	256.417
ENSG00000110077	MS4A6A	-2.22038	21.178
ENSG00000145911	N4BP3	-2.22046	120.691
ENSG00000179144	GIMAP7	-2.22671	175.033
ENSG00000169413	RNASE6	-2.22828	4.61937
ENSG00000173805	HAP1	-2.23012	3.94601
ENSG00000188404	SELL	-2.23298	18.6593
ENSG00000123500	COL10A1	-2.23569	5.90034
ENSG00000169860	P2RY1	-2.24267	12.1813
ENSG00000069122	ADGRF5	-2.25832	271.121
ENSG00000172031	EPHX4	-2.26107	33.2541
ENSG00000155324	GRAMD2B	-2.27391	3.88691
ENSG00000164330	EBF1	-2.27626	3.19984
ENSG00000135324	MRAP2	-2.2776	57.7849
ENSG00000178538	CA8	-2.28221	22.0941
ENSG00000144476	ACKR3	-2.28465	55.8101
ENSG00000010319	SEMA3G	-2.29252	48.7413
ENSG00000175556	LONRF3	-2.29547	19.9656
ENSG00000081237	PTPRC	-2.30059	4.68115
ENSG00000169744	LDB2	-2.30235	286.006
ENSG00000007908	SELE	-2.31211	9.0398
ENSG00000101331	CCM2L	-2.31764	37.1721
ENSG00000171860	C3AR1	-2.32846	6.95956
ENSG00000165507	DEPP1	-2.33049	0
ENSG00000157570	TSPAN18	-2.33085	299.701
ENSG00000141497	ZMYND15	-2.33118	2.19925
ENSG00000105852	PON3	-2.33388	3.33761
ENSG00000204956	PCDHGA1	-2.33807	3.68121
ENSG00000134215	VAV3	-2.33951	15.5325
ENSG00000285816	AP000944.2	-2.34078	4.38743
ENSG00000136160	EDNRB	-2.34395	48.4544
ENSG00000198535	C2CD4A	-2.35849	4.30079
ENSG00000119922	IFIT2	-2.36312	25.9032
ENSG00000079385	CEACAM1	-2.36695	19.3222
ENSG00000121858	TNFSF10	-2.38162	166.22
ENSG00000004468	CD38	-2.38736	3.83748
ENSG00000157601	MX1	-2.39777	24.6294
ENSG00000049249	TNFRSF9	-2.39802	2.95008
ENSG00000128052	KDR	-2.40256	0
ENSG00000063127	SLC6A16	-2.40484	7.85751
ENSG00000107719	PALD1	-2.40521	151.159
ENSG00000164116	GUCY1A1	-2.40645	3.56135
ENSG00000147408	CSGALNACT1	-2.40875	163.602
ENSG00000179044	EXOC3L1	-2.41074	24.5611
ENSG00000139508	SLC46A3	-2.41672	57.9873
ENSG00000120278	PLEKHG1	-2.42013	261.287
ENSG00000113212	PCDHB7	-2.42267	2.4268
ENSG00000149256	TENM4	-2.42371	7.85566
ENSG00000151136	BTBD11	-2.42752	5.77067
ENSG00000274736	CCL23	-2.42903	4.33614
ENSG00000124749	COL21A1	-2.43107	21.2865
ENSG00000153094	BCL2L11	-2.43781	66.2169
ENSG00000167037	SGSM1	-2.44075	9.48006
ENSG00000106236	NPTX2	-2.44744	2.86508
ENSG00000181804	SLC9A9	-2.45426	19.1357
ENSG00000164929	BAALC	-2.46142	7.70628
ENSG00000146006	LRRTM2	-2.47022	7.34172
ENSG00000186479	RGS7BP	-2.47167	98.3906
ENSG00000182022	CHST15	-2.47245	261.294
ENSG00000002587	HS3ST1	-2.49438	8.48977
ENSG00000170323	FABP4	-2.49583	77.499
ENSG00000103489	XYLT1	-2.50469	27.8603
ENSG00000152217	SETBP1	-2.50601	55.8865
ENSG00000065618	COL17A1	-2.50931	8.04135
ENSG00000169432	SCN9A	-2.51793	47.6535
ENSG00000101445	PPP1R16B	-2.55598	0
ENSG00000152689	RASGRP3	-2.5778	179.704
ENSG00000171115	GIMAP8	-2.58135	0
ENSG00000054219	LY75	-2.59029	42.4056
ENSG00000004799	PDK4	-2.63469	73.8427
ENSG00000143816	WNT9A	-2.65513	26.4431
ENSG00000163554	SPTA1	-2.66787	2.37083
ENSG00000158683	PKD1L1	-2.67553	25.176
ENSG00000196329	GIMAP5	-2.69773	2.76387
ENSG00000113555	PCDH12	-2.7261	279.028
ENSG00000134326	CMPK2	-2.7305	2.91649
ENSG00000130755	GMFG	-2.74281	51.3043
ENSG00000119686	FLVCR2	-2.82113	23.0388
ENSG00000103647	CORO2B	-2.86038	54.1812
ENSG00000184113	CLDN5	-2.86737	151.83
ENSG00000136842	TMOD1	-2.88375	15.0209
ENSG00000266094	RASSF5	-2.88987	6.2742
ENSG00000118777	ABCG2	-2.92607	99.3474
ENSG00000169129	AFAP1L2	-2.93872	6.65621
ENSG00000214814	FER1L6	-2.94377	4.7421
ENSG00000111335	OAS2	-2.94514	61.6743
ENSG00000152213	ARL11	-2.94755	4.70076
ENSG00000283632	EXOC3L2	-3.05129	3.44994
ENSG00000128917	DLL4	-3.07431	188.617
ENSG00000126838	PZP	-3.0853	6.19693
ENSG00000015413	DPEP1	-3.18024	3.56873
ENSG00000102575	ACP5	-3.1837	6.95128
ENSG00000070182	SPTB	-3.44476	5.24385
ENSG00000204161	TMEM273	-3.50433	21.5458
ENSG00000104938	CLEC4M	-3.60279	4.31097
ENSG00000137474	MYO7A	-3.78247	51.5315
ENSG00000116690	PRG4	-4.23387	6.33827
ENSG00000184344	GDF3	-5.06698	13.5861
