# Supplementary material for: A YAP/TAZ-TEAD signalling module links endothelial nutrient acquisition to angiogenic growth
Source: Nat Metab. 2022 Jun 20;4(6):672–82. doi: 10.1038/s42255-022-00584-y (PMC9236904; doi:10.1038/s42255-022-00584-y)
Supplement: Supplementary file 4 — Genomic localization of YAP, TAZ and TEAD1 binding sites at the genomic loci of YAP/TAZ-regulated genes. [file 42255_2022_584_MOESM4_ESM.xlsx]

## Sheet: Sheet1
Gene Name	Full Name	TAZ ChIP-Seq Peaks Genomic Localization	YAP ChIP-Seq Peaks Genomic Localization	TEAD1 ChIP-Seq Peaks Genomic Localization
SLC1A4	Solute carrier family 1 member 4	chr2:64989355-64989791	Not detected	chr2:64998662-64998994
		chr2:64998763-64998989
SLC15A4	Solute carrier family 15 member 4	chr12:128794596-128795176	chr12:128794790-128795058	chr12:128794779-128795225
		chr12:128796182-128796378		chr12:128797297-128798080
		chr12:128796839-128798042		chr12:128801778-128802102
		chr12:128823548-128823790		chr12:128818679-128818887
SLC3A2	Solute carrier family 3 member 2	chr11:62855656-62856153	Not detected	chr11:62855796-62856233
		chr11:62880266-62880593		chr11:62889853-62890384
		chr11:62880809-62881570
SLC25A40	Solute carrier family 25 member 40	chr7:87875794-87876737	Not detected	chr7:87876063-87876272
SLC7A14	Solute carrier family 7 member 14	chr3:170585182-170585781	Not detected	chr3:170523310-170523563
				chr3:170564078-170564401
SLC1A5	Solute carrier family 1 member 5	chr19:46784618-46784814	Not detected	Not detected
		chr19:46786465-46786845
		chr19:46787309-46787952
		chr19:46788123-46788624
SLC8A1	Solute carrier family 8 member A1	chr2:40332623-40332835	chr2:40401972-40402206	chr2:40096391-40096706
		chr2:40401896-40402433		chr2:40168066-40168540
		chr2:40434733-40435336	chr2:40434868-40435306	chr2:40332449-40332982
		chr2:40435525-40435750		chr2:40352375-40352708
		chr2:40511722-40511949		chr2:40400623-40401027
				chr2:40401792-40402437
				chr2:40434713-40435429
				chr2:40511551-40512120
SLC7A5	Solute carrier family 7 member 5	chr16:87837163-87837858	chr16:87837342-87837592	chr16:87837197-87837721
		chr16:87869153-87869412		chr16:87840279-87840561
SLC9A3R1	Solute carrier family 9 member A3 regulator 1	chr17:74748667-74749638	Not detected	Not detected
SLC16A7	Solute carrier family 16 member 7	chr12:59596259-59596702	Not detected	chr12:59651483-59651821
		chr12:59596901-59597137
SLC7A11	Solute carrier family 7 member 11	chr4:138235653-138235930	chr4:138222286-138222527	chr4:138199522-138199992
				chr4:138221999-138222560
			chr4:138235661-138235871	chr4:138225480-138225821
				chr4:138235129-138236120
				chr4:138242258-138242692
SLC38A5	Solute carrier family 38 member 5	Not detected	Not detected	Not detected
SLC19A2	Solute carrier family 19 member 2	chr1:169485423-169486427	Not detected	chr1:169486094-169486543
SLC16A12	Solute carrier family 16 member 12	chr10:89458358-89458787	chr10:89458377-89458836	chr10:89452057-89452299
				chr10:89458142-89459150
				chr10:89466675-89467199
				chr10:89469526-89469871
				chr10:89481173-89482032
SLC7A1	Solute carrier family 7 member 1	chr13:29520768-29520976	chr13:29520820-29521035	chr13:29520648-29521183
				chr13:29547217-29547567
		chr13:29538213-29538412		chr13:29548797-29549107
		chr13:29548702-29548949		chr13:29563893-29564337
		chr13:29594768-29595367		chr13:29594324-29594579
SLC7A2	Solute carrier family 7 member 2	chr8:17497282-17497700	Not detected	Not detected
SLC6A9	Solute carrier family 6 member 9	chr1:44029908-44030305	Not detected	chr1:43991679-43991990
		chr1:44030590-44030983
SLC38A1	Solute carrier family 38 member 1	chr12:46209914-46210304	chr12:46219889-46220643	chr12:46209880-46210173
		chr12:46219778-46220697		chr12:46219779-46220814
		chr12:46267284-46268484		chr12:46221258-46222042
		chr12:46268578-46269567		chr12:46263218-46263543
SLCO4A1	Solute carrier organic anion transporter family member 4A1	chr20:62641892-62642524	Not detected	chr20:62652076-62652530
		chr20:62642737-62643206
		chr20:62652077-62652437
SLC39A14	Solute carrier family 39 member 14	chr8:22367496-22367921	Not detected	chr8:22383622-22384061
		chr8:22383559-22384176		chr8:22396558-22396866
SLC35G2	Solute carrier family 35 member G2	chr3:136818763-136819586	Not detected	chr3:136818293-136818524
				chr3:136838636-136839682
		chr3:136819989-136820504		chr3:136844795-136844998
ANKRD1	Ankyrin repeat domain 1	chr10:90920959-90921881	chr10:90921166-90921771	chr10:90917186-90917389
				chr10:90917533-90917808
				chr10:90918038-90918294
				chr10:90920871-90921773
CYR61 (CCN1)	Cellular communication network factor 1	chr1:85580567-85581692	chr1:85581894-85582623	chr1:85580435-85580887
				chr1:85581435-85581923
		chr1:85582030-85582462		chr1:85582862-85583313
CTGF (CCN2)	Cellular communication network factor 2	chr6:131949191-131949433	chr6:131949462-131949666	chr6:131948982-131949810
		chr6:131949988-131952062	chr6:131949879-131950097	chr6:131950429-131950703
			chr6:131951274-131951730	chr6:131951201-131952158
COL8A1	Collagen type VIII alpha 1 chain	chr3:99638320-99638701	chr3:99660052-99660284	chr3:99637027-99637230
				chr3:99637316-99637735
				chr3:99640529-99640840
				chr3:99647083-99647745
				chr3:99648104-99648345
				chr3:99651400-99651962
				chr3:99659148-99659380
				chr3:99659672-99660402
				chr3:99674508-99674765
				chr3:99678297-99678528
				chr3:99699761-99700260
				chr3:99700921-99701248
				chr3:99716647-99716949
				chr3:99747957-99748273
		chr3:99660049-99660277		chr3:99751642-99752219
AXL	AXL receptor tyrosine kinase	chr19:41218973-41219306	chr19:41223349-41223877	chr19:41220394-41220648
		chr19:41223009-41224033	chr19:41225836-41226438	chr19:41223262-41224042
		chr19:41225330-41226896	chr19:41262130-41262351	chr19:41225620-41226650
		chr19:41263898-41264991
