# Supplementary material for: A YAP/TAZ-TEAD signalling module links endothelial nutrient acquisition to angiogenic growth
Source: Nat Metab. 2022 Jun 20;4(6):672–82. doi: 10.1038/s42255-022-00584-y (PMC9236904; doi:10.1038/s42255-022-00584-y)
Supplement: Supplementary file 5 — Gene-specific siRNAs. [file 42255_2022_584_MOESM5_ESM.xlsx]

## Sheet: ON-TARGET sRNAs
ON-TARGETplus SMARTpool siRNAs	Source	Identifier
YAP	Dharmacon	#L-012200-00
TAZ	Dharmacon	#L-016083-00
TEAD1	Dharmacon	#L-012603-00-0020
TEAD2	Dharmacon	#L-012611-01-0020
TEAD4	Dharmacon	#L-019570-00-0020
SLC7A5	Dharmacon	#L-004953-01-0020
control siRNAs	Dharmacon	#D001810-10-15
