# Supplementary material for: A YAP/TAZ-TEAD signalling module links endothelial nutrient acquisition to angiogenic growth
Source: Nat Metab. 2022 Jun 20;4(6):672–82. doi: 10.1038/s42255-022-00584-y (PMC9236904; doi:10.1038/s42255-022-00584-y)
Supplement: Supplementary file 6 — Gene-specific gRNA sequences used for CRISPR–Cas9 genome editing studies in HUVECs. [file 42255_2022_584_MOESM6_ESM.xlsx]

## Sheet: Sheet1
Guide RNA (gRNA)	gRNA sequence
gCtrl 1	aaaaagcttccgcctgatgg
gCtrl 2	aaaacaggacgatgtgcggc
gCtrl 3	aaaacatcgaccgaaagcgt
gSLC7A5 1	cgactacgcctacatgctgg
gSLC7A5 2	catcacgctgctcaacggcg
gSLC7A5 3	aggacaggcccacgaagacg
gRRAGA 1	cgaaaacaagcacactccag
gRRAGA 2	ttattaccagtcgtgtctgg
gRRAGA 3	tgatttgggcaaaattcctg
gRRAGB 1	gacttccatactctggaaag
gRRAGB 2	tgttcgatttctgggaaacc
gRRAGB 3	taatttcagcaaaattcctt
