# Supplementary material for: A YAP/TAZ-TEAD signalling module links endothelial nutrient acquisition to angiogenic growth
Source: Nat Metab. 2022 Jun 20;4(6):672–82. doi: 10.1038/s42255-022-00584-y (PMC9236904; doi:10.1038/s42255-022-00584-y)
Supplement: Supplementary file 7 — Quantitative PCR with reverse transcription probes. [file 42255_2022_584_MOESM7_ESM.xlsx]

## Sheet: TaqMan probes
Gene Symbol	Dye	Assay ID	Source
ACTB	FAM-MGB	(Hs99999903_m1)	Applied Biosystems
ANKRD1	FAM-MGB	(Hs00923599_m1)	Applied Biosystems
CTGF	FAM-MGB	(Hs00170014_m1)	Applied Biosystems
CYR61	FAM-MGB	(Hs00155479_m1)	Applied Biosystems
WWTR1	FAM-MGB	(Hs00210007_m1)	Applied Biosystems
YAP	FAM-MGB	(Hs00371735_m1)	Applied Biosystems
Actb	FAM-MGB	(Mm02619580_g1)	Applied Biosystems
Ctgf	FAM-MGB	(Mm01192933_g1)	Applied Biosystems
Slc7a5	FAM-MGB	(Mm00441516_m1)	Applied Biosystems
