# Supplementary material for: A YAP/TAZ-TEAD signalling module links endothelial nutrient acquisition to angiogenic growth
Source: Nat Metab. 2022 Jun 20;4(6):672–82. doi: 10.1038/s42255-022-00584-y (PMC9236904; doi:10.1038/s42255-022-00584-y)
Supplement: Supplementary file 8 — Antibodies for western blotting and immunofluorescence. [file 42255_2022_584_MOESM8_ESM.xlsx]

## Sheet: Antibodies
Primary Antibodies for Western blot analysis	Source	Identifier	Dilution
ASCT2 (SLC1A5)	Cell Signaling Technology	#5345	1:1000
FLAG M2	Sigma	#F-3165	1:4000
GAPDH	Cell Signaling Technology	#2118	1:5000
GFP	Cell Signaling Technology	#2555	1:5000
LAT1 (SLC7A5)	Cell Signaling Technology	#5347	1:5000
mTOR	Cell Signaling Technology	#2983	1:1000
Pan-TEAD	Cell Signaling Technology	#13295	1:1000
phospho-4EB-P1 (Ser65)	Cell Signaling Technology	#9456	1:5000
phospho-p70 S6 kinase (Thr389)	Cell Signaling Technology	#9205	1:1000
p70 S6 kinase	Cell Signaling Technology	#9202	1:1000
phospho-S6 (Ser235/236) ribosomal protein	Cell Signaling Technology	#4857	1:5000
phospho-S6 (Ser240/244) ribosomal protein	Cell Signaling Technology	#2215	1:5000
RagA	Cell Signaling Technology	#4357	1:1000
RagB	Cell Signaling Technology	#8150	1:1000
S6 ribosomal protein	Cell Signaling Technology	#2217	1:5000
TAZ	Cell Signaling Technology	#4883	1:2000
TEAD4	Santa Cruz	#sc-101184	1:1000
TUBULIN	Cell Signaling Technology	#2148	1:5000
VEGFR2	Cell Signaling Technology	#2479	1:1000
YAP	Cell Signaling Technology	#4912	1:1000
YAP/TAZ	Cell Signaling Technology	#8418	1:1000
4E-BP1	Cell Signaling Technology	#9644	1:5000
Secondary Antibodies for Western blot analysis	Source	Identifier	Dilution
anti-rabbit HRP-conjugated	Jackson Immuno Reserach Labs	111-035-008	1:5000
anti-mouse HRP-conjugated	Jackson Immuno Reserach Labs	315-035-003	1:5000
anti-goat HRP-conjugated	Jackson Immuno Reserach Labs	305-036-008	1:5000
anti-rabbit TrueBlot antibodies	Rockland Immunochemicals	#18-8816-33	1:2000
Primary Antibodies for Immunofluorescence	Source	Identifier	Dilution
mTOR	Cell Signaling Technology	#2983	1:100
LAMP2	(Abcam	#Ab25631	1:100
GFP	Acris	#R1091P	1:500
ERG	Abcam	#ab92513	1:400
PECAM-1	R&D Biosystems	#AF3628	1:200
phospho-S6 (Ser235/236) ribosomal protein	Cell Signaling Technology,	#4857	1:150
phospho-S6 (Ser 240/244) ribosomal protein	Cell Signaling Technology,	#2215	1:100
TAZ	Sigma	#HPA007415	1:200
VE-cadherin	BD Biosciences	#555289	1:200
Secondary antibodies for Immunofluorescence	Source	Identifier	Dilution
Alexa-Fluor 488	Invitrogen	A21206; A-21208; A11055	1:400
Alexa-Fluor 555	Invitrogen	A-21432; A31572	1:400
Alexa-Fluor 594	Invitrogen	A-21207	1:400
Alexa-Fluor Cy3	Jackson ImmunoResearch	712-165-153	1:400
Alexa-Fluor 647	Invitrogen	A-21447; A31573; A32849	1:400
Alexa Fluor 647	Jackson ImmunoResearch	712-605-153	1:400
