# Supplementary material for: A YAP/TAZ-TEAD signalling module links endothelial nutrient acquisition to angiogenic growth
Source: Nat Metab. 2022 Jun 20;4(6):672–82. doi: 10.1038/s42255-022-00584-y (PMC9236904; doi:10.1038/s42255-022-00584-y)
Supplement: Supplementary file 9 — Genetic mouse models. [file 42255_2022_584_MOESM9_ESM.xlsx]

## Sheet: Sheet1
Allele(s)	Deleter	4OHT protocol	Analysis time points	Overall phenotype	Survival
Yap fl/fl	Pdgfb-CreERT2	P1-4	P6	No gross abnormalities	Unaffected
Taz fl/fl	Pdgfb-CreERT2	P1-4	P6	No gross abnormalities	Unaffected
Yap fl/fl;Taz fl/fl	Pdgfb-CreERT2	P1-4	P6, P21	No gross abnormalities	Unaffected
Taz tag/tag	N/a	N/a	P6	No gross abnormalities	Unaffected
Rosa26-Taz S89A fl/fl	Pdgfb-CreERT2	P1-4	P6, P21	No gross abnormalities	Unaffected
Yap fl/fl;Taz fl/fl;Rosa26-Taz S89A fl/+	Pdgfb-CreERT2	P1-4	P6	No gross abnormalities	Unaffected
Tead2 -/-	N/a	N/a	P6	No gross abnormalities	Unaffected
Tead4 fl/fl	Pdgfb-CreERT2	P1-4	P6	No gross abnormalities	Unaffected
Tead1fl/fl;Tead4 fl/fl	Pdgfb-CreERT2	P1-4	P6	No gross abnormalities	Unaffected
Tead1fl/fl;Tead2 -/-;Tead4 fl/fl	Pdgfb-CreERT2	P1-4	P6	No gross abnormalities	Unaffected
Slc7a5 fl/fl	Pdgfb-CreERT2	P1-4	P6	No gross abnormalities	Unaffected
RagA fl/fl;RagB fl/fl	Pdgfb-CreERT2	P1-4	P6	No gross abnormalities	Unaffected
RagA fl/fl;RagB fl/fl;Rosa26-Taz S89A fl/fl	Pdgfb-CreERT2	P1-4	P6	No gross abnormalities	Unaffected
